# Supplementary material for: Asian Indians Have Enhanced Skeletal Muscle Mitochondrial Capacity to Produce ATP in Association With Severe Insulin Resistance
Source: Oxford University Press journal article supplement (doi:10.2337/db07-1556), 2008-02-20
Supplement: db071556onlineappendixtable.xls [file db071556onlineappendixtable.xls]

## Sheet: Sheet1
Supplementary Table 1. Differentially expressed transcripts between non-diabetic (ND) and
diabetic Asian Indians (DM). P values were calculated using un-paired t-tests, and not adjusted
for multiple comparison errors. Annotations for each transcript were provided by Affymetrix
NetAffx Analysis Center.
probe set	Mean-ND	Mean-DM	Fold-Change (DM/ND)	Log2(DM/ND)	p-Values	Gene_Symbol	AC_number	gene_name	GO_Biological_Process	GO_Cell_Component	GO_Molecular_Function	Pathway
1562256_at	139.738	117.073	0.837805	-0.255314	2.74575e-06	NALP1	AL832400	NACHT, leucine rich repeat and PYD (pyrin domain) containing 1	6917 // induction of apoptosis // non-traceable author statement /// 6919 // caspase activation // non-traceable author statement /// 42829 // defense response to pathogen // inferred from electronic annotation /// 42981 // regulation of apoptosis // inferred from electronic annotation /// 6952 // defense response // inferred from electronic annotation /// 6915 // apoptosis // inferred from elect…	5622 // intracellular // Unknown /// 5622 // intracellular // inferred from electronic annotation	166 // nucleotide binding // inferred from electronic annotation /// 5524 // ATP binding // inferred from electronic annotation /// 8656 // caspase activator activity // non-traceable author statement /// 19899 // enzyme binding // inferred from physical interaction /// 5515 // protein binding // inferred from electronic annotation	---
207755_at	73.587	58.2827	0.792024	-0.336384	3.92864e-06	---	NM_025017	---	---	---	---	---
1563523_at	175.421	132.177	0.753486	-0.408348	4.86105e-06	---	AL832298	---	---	---	---	---
1554586_a_at	241.708	186.258	0.770588	-0.375968	9.62247e-06	RHOBTB2	BC034917	Rho-related BTB domain containing 2	7264 // small GTPase mediated signal transduction // inferred from electronic annotation	5622 // intracellular // inferred from electronic annotation /// 16020 // membrane // inferred from electronic annotation	166 // nucleotide binding // inferred from electronic annotation /// 5515 // protein binding // inferred from electronic annotation /// 5525 // GTP binding // inferred from electronic annotation	---
227686_at	174.548	143.802	0.823855	-0.279538	1.00156e-05	OXNAD1	BE465433	oxidoreductase NAD-binding domain containing 1	6118 // electron transport // inferred from electronic annotation	---	16491 // oxidoreductase activity // inferred from electronic annotation	---
219062_s_at	79.7726	115.876	1.45258	0.538616	1.35654e-05	ZCCHC2	NM_017742	zinc finger, CCHC domain containing 2	---	---	3676 // nucleic acid binding // inferred from electronic annotation /// 8270 // zinc ion binding // inferred from electronic annotation /// 46872 // metal ion binding // inferred from electronic annotation	---
226568_at	69.9513	57.2482	0.818401	-0.289121	1.6331e-05	FAM102B	AI478747	family with sequence similarity 102, member B	---	---	---	---
230168_at	86.9651	70.7347	0.813368	-0.298019	1.68357e-05	---	AI080614	Transcribed locus, moderately similar to XP_531878.2 PREDICTED: similar to zinc finger protein 91 (HPF7, HTF10) [Canis familiaris]	---	---	---	---
1559806_at	122.8	104.582	0.85165	-0.231667	2.23526e-05	---	BC039091	Homo sapiens, clone IMAGE:5166543, mRNA	---	---	---	---
237494_at	305.765	227.376	0.743629	-0.427345	2.24046e-05	---	AA625847	---	---	---	---	---
237695_at	119.439	98.0463	0.820889	-0.284741	2.54534e-05	---	BF197664	Transcribed locus	---	---	---	---
220479_at	77.7607	67.3391	0.865979	-0.207596	3.04857e-05	PRO0132	NM_014116	PRO0132 protein	---	---	---	---
242092_at	136.452	121.035	0.887017	-0.172967	3.06849e-05	---	AA019300	---	---	---	---	---
236961_at	65.2703	52.7457	0.808111	-0.307375	3.28162e-05	ATN1	AI539426	Atrophin 1	7417 // central nervous system development // traceable author statement	5634 // nucleus // traceable author statement /// 5737 // cytoplasm // traceable author statement	5515 // protein binding // inferred from physical interaction /// 5515 // protein binding // traceable author statement	---
1556737_at	233.959	189.891	0.811642	-0.301085	3.47792e-05	FLJ31222	AK055784	FLJ31222 protein	---	---	---	---
241490_s_at	146.87	119.583	0.814212	-0.296523	4.45096e-05	---	BE858544	---	---	---	---	---
1560474_at	123.908	105.987	0.855368	-0.225383	4.46123e-05	NIPBL	BM728509	Nipped-B homolog (Drosophila)	7049 // cell cycle // inferred from electronic annotation	5634 // nucleus // inferred from electronic annotation	5488 // binding // inferred from electronic annotation	---
235945_at	75.3802	59.7412	0.792532	-0.335459	4.47813e-05	---	AW975324	Transcribed locus	---	---	---	---
215930_s_at	582.398	461.743	0.79283	-0.334917	4.79922e-05	CTAGE5	U73682	CTAGE family, member 5	6396 // RNA processing // inferred from electronic annotation	---	175 // 3'-5'-exoribonuclease activity // inferred from electronic annotation /// 3723 // RNA binding // inferred from electronic annotation /// 5515 // protein binding // traceable author statement /// 8047 // enzyme activator activity // traceable author statement	---
241222_at	235.85	178.72	0.757767	-0.400173	5.76411e-05	---	AI827473	---	---	---	---	---
218685_s_at	298.432	237.592	0.796135	-0.328915	6.6619e-05	SMUG1	NM_014311	single-strand-selective monofunctional uracil-DNA glycosylase 1	5975 // carbohydrate metabolism // inferred from electronic annotation /// 6281 // DNA repair // inferred from electronic annotation /// 6974 // response to DNA damage stimulus // inferred from electronic annotation	5634 // nucleus // inferred from electronic annotation	3677 // DNA binding // inferred from electronic annotation /// 5515 // protein binding // inferred from physical interaction /// 16798 // hydrolase activity, acting on glycosyl bonds // inferred from electronic annotation /// 16787 // hydrolase activity // inferred from electronic annotation	---
224758_at	77.5987	98.5437	1.26991	0.344731	6.96771e-05	LOC641845 /// LOC647087	BG393032	hypothetical protein LOC641845 /// hypothetical protein LOC647087	---	---	---	---
223744_s_at	77.352	67.5438	0.8732	-0.195616	7.36371e-05	SIAE	AF300796	sialic acid acetylesterase	---	5764 // lysosome // inferred from electronic annotation	1681 // sialate O-acetylesterase activity // inferred from electronic annotation /// 4759 // serine esterase activity // inferred from electronic annotation /// 16787 // hydrolase activity // inferred from electronic annotation	---
202958_at	178.104	136.449	0.766119	-0.38436	7.70525e-05	PTPN9	NM_002833	protein tyrosine phosphatase, non-receptor type 9	6470 // protein amino acid dephosphorylation // traceable author statement /// 6810 // transport // inferred from electronic annotation /// 6470 // protein amino acid dephosphorylation // inferred from electronic annotation	5622 // intracellular // inferred from electronic annotation	4726 // non-membrane spanning protein tyrosine phosphatase activity // traceable author statement /// 5215 // transporter activity // inferred from electronic annotation /// 16787 // hydrolase activity // inferred from electronic annotation /// 4721 // phosphoprotein phosphatase activity // inferred from electronic annotation /// 4725 // protein tyrosine phosphatase activity // inferred from elec…	Cell adhesion molecules (CAMs) // KEGG /// Adherens junction // KEGG /// Jak-STAT signaling pathway // KEGG /// T cell receptor signaling pathway // KEGG /// B cell receptor signaling pathway // KEGG /// Leukocyte transendothelial migration // KEGG /// Insulin signaling pathway // KEGG /// Adipocytokine signaling pathway // KEGG /// Type I diabetes mellitus // KEGG /// Epithelial cell signaling i…
233610_at	87.1409	71.8488	0.824513	-0.278386	7.84311e-05	LOC645355	AI208607	Hypothetical protein LOC645355	---	---	---	---
1566500_at	84.5286	74.814	0.885074	-0.176131	9.1762e-05	---	AK000794	---	---	---	---	---
1570230_at	96.4111	76.2416	0.790796	-0.338622	9.38427e-05	FLJ13391	BC018659	Hypothetical protein FLJ13391	---	---	---	---
242236_at	96.3656	70.3421	0.729951	-0.454129	0.000101595	---	BE671519	---	---	---	---	---
1555486_a_at	130.025	107.562	0.827239	-0.273623	0.00010398	FLJ14213	BC008922	hypothetical protein FLJ14213	---	---	---	---
213376_at	141.534	173.741	1.22756	0.295789	0.000105431	ZBTB1	AI656706	zinc finger and BTB domain containing 1	6350 // transcription // inferred from electronic annotation /// 6355 // regulation of transcription, DNA-dependent // inferred from electronic annotation	5634 // nucleus // inferred from electronic annotation	3677 // DNA binding // inferred from electronic annotation /// 5515 // protein binding // inferred from electronic annotation /// 8270 // zinc ion binding // inferred from electronic annotation /// 46872 // metal ion binding // inferred from electronic annotation /// 3676 // nucleic acid binding // inferred from electronic annotation	---
237609_at	84.15	69.4769	0.825631	-0.27643	0.000116341	LOC643194	AI697532	Hypothetical protein LOC643194	---	---	---	---
215079_at	59.9279	46.2867	0.772373	-0.372631	0.000120598	---	AK026723	CDNA: FLJ23070 fis, clone LNG05629	---	---	---	---
205198_s_at	111.637	97.5628	0.873932	-0.194407	0.000126097	ATP7A	NM_000052	---	6825 // copper ion transport // inferred from electronic annotation /// 15694 // mercury ion transport // inferred from electronic annotation /// 30001 // metal ion transport // inferred from electronic annotation	16020 // membrane // inferred from electronic annotation	4008 // copper-exporting ATPase activity // inferred from electronic annotation /// 5507 // copper ion binding // inferred from electronic annotation /// 5524 // ATP binding // inferred from electronic annotation /// 15097 // mercury ion transporter activity // inferred from electronic annotation /// 46872 // metal ion binding // inferred from electronic annotation	---
232805_at	112.448	81.8928	0.728272	-0.45745	0.000126725	COL11A1	AW451645	Collagen, type XI, alpha 1	1502 // cartilage condensation // traceable author statement /// 6817 // phosphate transport // inferred from electronic annotation /// 7155 // cell adhesion // inferred from electronic annotation /// 7601 // visual perception // traceable author statement /// 7605 // sensory perception of sound // inferred from electronic annotation /// 16337 // cell-cell adhesion // non-traceable author stateme…	5581 // collagen // inferred from electronic annotation /// 5592 // collagen type XI // traceable author statement /// 5737 // cytoplasm // inferred from electronic annotation /// 5578 // extracellular matrix (sensu Metazoa) // inferred from electronic annotation /// 5578 // extracellular matrix (sensu Metazoa) // non-traceable author statement	5201 // extracellular matrix structural constituent // inferred from electronic annotation /// 5201 // extracellular matrix structural constituent // non-traceable author statement /// 30674 // protein binding, bridging // non-traceable author statement /// 5198 // structural molecule activity // inferred from electronic annotation	---
220747_at	170.325	139.953	0.821683	-0.283347	0.000129505	HSPC072	NM_014162	HSPC072 protein	---	---	---	---
1570070_at	156.741	122.959	0.78447	-0.350209	0.00013155	C20orf160	BC019892	chromosome 20 open reading frame 160	---	---	---	---
206524_at	148.399	132.061	0.889906	-0.168275	0.000133661	T	NM_003181	T, brachyury homolog (mouse)	6350 // transcription // inferred from electronic annotation /// 6355 // regulation of transcription, DNA-dependent // inferred from electronic annotation /// 6366 // transcription from RNA polymerase II promoter // not recorded /// 7165 // signal transduction // non-traceable author statement /// 7275 // development // inferred from electronic annotation /// 7498 // mesoderm development // trace…	5634 // nucleus // inferred from electronic annotation	3700 // transcription factor activity // non-traceable author statement /// 3677 // DNA binding // inferred from electronic annotation /// 3700 // transcription factor activity // inferred from electronic annotation	---
207710_at	77.2849	63.4988	0.82162	-0.283458	0.000134895	LCE2B	NM_014357	late cornified envelope 2B	8544 // epidermis development // non-traceable author statement /// 31424 // keratinization // inferred from electronic annotation	---	---	---
1556107_at	268.574	214.177	0.797461	-0.326514	0.000139757	---	AL832253	MRNA; cDNA DKFZp667C1617 (from clone DKFZp667C1617)	---	---	---	---
224070_at	62.4869	53.7902	0.860824	-0.21621	0.000144916	tAKR	AB037902	aldo-keto reductase, truncated	---	---	4033 // aldo-keto reductase activity // traceable author statement /// 16491 // oxidoreductase activity // inferred from electronic annotation	---
1556920_s_at	133.609	102.774	0.769216	-0.37854	0.000147483	LOC646168	AK093355	hypothetical protein LOC646167	---	---	---	---
223195_s_at	133.199	115.877	0.869955	-0.200988	0.000149638	SESN2	BF131886	sestrin 2	7050 // cell cycle arrest // inferred from electronic annotation	5634 // nucleus // inferred from electronic annotation	---	---
216678_at	125.823	110.144	0.875388	-0.192006	0.000151454	IFT122	AK000773	intraflagellar transport 122 homolog (Chlamydomonas)	---	---	5488 // binding // inferred from electronic annotation	---
236986_at	93.2841	79.7768	0.855202	-0.225663	0.000155649	---	AI732308	---	---	---	---	---
208179_x_at	154.749	125.664	0.812052	-0.300355	0.000156799	KIR2DL3	AF022048	killer cell immunoglobulin-like receptor, two domains, long cytoplasmic tail, 3	6955 // immune response // traceable author statement /// 6955 // immune response // inferred from sequence or structural similarity /// 6952 // defense response // non-traceable author statement /// 30102 // negative regulation of natural killer cell activity // non-traceable author statement	5887 // integral to plasma membrane // traceable author statement /// 16020 // membrane // inferred from electronic annotation /// 16021 // integral to membrane // inferred from sequence or structural similarity /// 16021 // integral to membrane // inferred from electronic annotation /// 16021 // integral to membrane // traceable author statement /// 5887 // integral to plasma membrane // non-tra…	3823 // antigen binding // traceable author statement /// 4872 // receptor activity // inferred from electronic annotation /// 4872 // receptor activity // traceable author statement /// 4872 // receptor activity // inferred from sequence or structural similarity /// 30110 // HLA-C specific inhibitory MHC class I receptor activity // non-traceable author statement /// 4872 // receptor activity //…	---
227986_at	115.107	94.9748	0.825097	-0.277365	0.000162019	ZNF343	AW014719	zinc finger protein 343	6350 // transcription // inferred from electronic annotation /// 6355 // regulation of transcription, DNA-dependent // inferred from electronic annotation	5634 // nucleus // inferred from electronic annotation /// 5622 // intracellular // inferred from electronic annotation	3677 // DNA binding // inferred from electronic annotation /// 8270 // zinc ion binding // inferred from electronic annotation /// 46872 // metal ion binding // inferred from electronic annotation /// 3676 // nucleic acid binding // inferred from electronic annotation	---
1561218_s_at	190.274	152.455	0.801237	-0.319699	0.00016487	ZDHHC20	BC034593	Zinc finger, DHHC-type containing 20 /// CDNA clone IMAGE:4837157	---	16020 // membrane // inferred from electronic annotation /// 16021 // integral to membrane // inferred from electronic annotation	8270 // zinc ion binding // inferred from electronic annotation /// 8415 // acyltransferase activity // inferred from electronic annotation /// 16740 // transferase activity // inferred from electronic annotation /// 46872 // metal ion binding // inferred from electronic annotation	---
244087_at	129.388	112.245	0.867504	-0.205058	0.000172253	AMPD3	AW444555	Adenosine monophosphate deaminase (isoform E)	6196 // AMP catabolism // traceable author statement /// 9117 // nucleotide metabolism // inferred from electronic annotation /// 9168 // purine ribonucleoside monophosphate biosynthesis // inferred from electronic annotation	---	3876 // AMP deaminase activity // traceable author statement /// 16787 // hydrolase activity // inferred from electronic annotation /// 3876 // AMP deaminase activity // inferred from electronic annotation /// 19239 // deaminase activity // inferred from electronic annotation	Purine metabolism // KEGG
226962_at	103.49	126.019	1.21769	0.284143	0.000176601	ZBTB41	AW299558	zinc finger and BTB domain containing 41	---	5634 // nucleus // inferred from electronic annotation	3676 // nucleic acid binding // inferred from electronic annotation /// 5515 // protein binding // inferred from electronic annotation /// 8270 // zinc ion binding // inferred from electronic annotation /// 46872 // metal ion binding // inferred from electronic annotation	---
232617_at	236.96	192.916	0.814132	-0.296665	0.000177642	CTSS	AK024855	cathepsin S	6508 // proteolysis // traceable author statement /// 6955 // immune response // traceable author statement /// 6508 // proteolysis // inferred from electronic annotation	5576 // extracellular region // non-traceable author statement /// 5764 // lysosome // non-traceable author statement /// 5764 // lysosome // inferred from electronic annotation /// 5764 // lysosome // not recorded	4218 // cathepsin S activity // traceable author statement /// 4197 // cysteine-type endopeptidase activity // inferred from electronic annotation /// 4218 // cathepsin S activity // inferred from electronic annotation /// 8233 // peptidase activity // inferred from electronic annotation /// 8234 // cysteine-type peptidase activity // inferred from electronic annotation /// 16787 // hydrolase act…	Antigen processing and presentation // KEGG
210652_s_at	72.8944	56.8819	0.780332	-0.357839	0.000179862	C1orf34	BC004399	chromosome 1 open reading frame 34	---	---	5488 // binding // inferred from electronic annotation	---
1556505_at	209.771	175.43	0.83629	-0.257925	0.00018467	---	BC035396	CDNA clone IMAGE:4826545	---	---	---	---
239156_at	69.763	60.1712	0.862509	-0.213388	0.000186287	BCAR3	AW615179	Breast cancer anti-estrogen resistance 3	74 // regulation of progression through cell cycle // traceable author statement /// 7264 // small GTPase mediated signal transduction // inferred from electronic annotation /// 42493 // response to drug // traceable author statement /// 7242 // intracellular signaling cascade // inferred from electronic annotation /// 7165 // signal transduction // traceable author statement	5622 // intracellular // inferred from electronic annotation	5085 // guanyl-nucleotide exchange factor activity // inferred from electronic annotation	---
206051_at	84.2096	73.5091	0.872931	-0.196061	0.000188112	ELAVL4	NM_021952	ELAV (embryonic lethal, abnormal vision, Drosophila)-like 4 (Hu antigen D)	6397 // mRNA processing // traceable author statement /// 6396 // RNA processing // traceable author statement	---	166 // nucleotide binding // inferred from electronic annotation /// 3723 // RNA binding // inferred from electronic annotation /// 3723 // RNA binding // traceable author statement /// 3730 // mRNA 3'-UTR binding // traceable author statement /// 3676 // nucleic acid binding // inferred from electronic annotation	---
1569006_at	261.39	222.14	0.849841	-0.234734	0.000190891	LOC284379	BC016813	solute carrier family 7 (cationic amino acid transporter, y+ system), member 3 pseudogene	6865 // amino acid transport // inferred from electronic annotation	16020 // membrane // inferred from electronic annotation	5279 // amino acid-polyamine transporter activity // inferred from electronic annotation	---
1561214_at	111.072	98.1171	0.883366	-0.178917	0.000197853	LOC642775	BC041869	Hypothetical protein LOC642775	---	---	---	---
208916_at	78.5717	70.1252	0.8925	-0.164076	0.000199182	SLC1A5	AF105230	solute carrier family 1 (neutral amino acid transporter), member 5	6810 // transport // inferred from electronic annotation /// 6835 // dicarboxylic acid transport // inferred from electronic annotation /// 15804 // neutral amino acid transport // traceable author statement	5624 // membrane fraction // traceable author statement /// 5887 // integral to plasma membrane // traceable author statement /// 16020 // membrane // inferred from electronic annotation /// 16021 // integral to membrane // inferred from electronic annotation	4872 // receptor activity // traceable author statement /// 15175 // neutral amino acid transporter activity // traceable author statement /// 15293 // symporter activity // inferred from electronic annotation /// 17153 // sodium:dicarboxylate symporter activity // inferred from electronic annotation /// 4872 // receptor activity // inferred from electronic annotation	---
231648_at	79.109	62.875	0.794789	-0.331355	0.000203083	ADARB2	BG150534	Adenosine deaminase, RNA-specific, B2 (RED2 homolog rat)	6381 // mRNA editing // traceable author statement /// 6396 // RNA processing // inferred from electronic annotation /// 6397 // mRNA processing // inferred from electronic annotation	5634 // nucleus // inferred from electronic annotation /// 5622 // intracellular // inferred from electronic annotation	3723 // RNA binding // inferred from electronic annotation /// 3725 // double-stranded RNA binding // traceable author statement /// 3727 // single-stranded RNA binding // traceable author statement /// 4000 // adenosine deaminase activity // inferred from electronic annotation /// 4000 // adenosine deaminase activity // traceable author statement /// 8270 // zinc ion binding // inferred from ele…	---
233285_at	103.675	86.5127	0.834457	-0.261091	0.00020487	MGC34824	AU158137	Hypothetical protein MGC34824	---	---	---	---
220851_at	94.8379	79.7262	0.840658	-0.250409	0.000209774	---	NM_014095	---	---	---	---	---
217393_x_at	754.168	627.743	0.832365	-0.264711	0.000217385	UBE2NL	AL109622	ubiquitin-conjugating enzyme E2N-like	6512 // ubiquitin cycle // inferred from electronic annotation	---	4842 // ubiquitin-protein ligase activity // inferred from electronic annotation	---
229518_at	148.716	129.113	0.868183	-0.203929	0.000225474	FAM46B	AA531023	family with sequence similarity 46, member B	---	---	---	---
215838_at	68.0166	56.7357	0.834145	-0.26163	0.000226786	LILRA5	AF212842	leukocyte immunoglobulin-like receptor, subfamily A (with TM domain), member 5	---	---	---	---
213179_at	244.453	196.219	0.802687	-0.31709	0.000228242	---	BG289914	---	---	---	---	---
1559167_x_at	300.718	271.053	0.901353	-0.149836	0.000229517	MPV17L	AK096918	MPV17 mitochondrial membrane protein-like	---	16021 // integral to membrane // inferred from electronic annotation	---	---
219776_s_at	85.0544	69.9464	0.822373	-0.282136	0.000229616	---	NM_018331	---	---	---	---	---
231951_at	745.711	582.227	0.780767	-0.357035	0.000230512	GNAO1	AL512686	guanine nucleotide binding protein (G protein), alpha activating activity polypeptide O	6936 // muscle contraction // traceable author statement /// 7165 // signal transduction // inferred from electronic annotation /// 7186 // G-protein coupled receptor protein signaling pathway // inferred from electronic annotation /// 7399 // nervous system development // not recorded /// 7411 // axon guidance // not recorded	---	166 // nucleotide binding // inferred from electronic annotation /// 3924 // GTPase activity // traceable author statement /// 5057 // receptor signaling protein activity // not recorded /// 5525 // GTP binding // inferred from electronic annotation /// 4871 // signal transducer activity // inferred from electronic annotation /// 19001 // guanyl nucleotide binding // inferred from electronic anno…	G_Protein_Signaling // GenMAPP /// G_Protein_Signaling // GenMAPP /// G_Protein_Signaling // GenMAPP /// G_Protein_Signaling // GenMAPP /// Calcium_regulation_in_cardiac_cells // GenMAPP /// Calcium_regulation_in_cardiac_cells // GenMAPP /// Calcium_regulation_in_cardiac_cells // GenMAPP /// Calcium_regulation_in_cardiac_cells // GenMAPP
210064_s_at	156.102	121.113	0.775854	-0.366142	0.000232991	UPK1B	NM_006952	uroplakin 1B	7582 // physiological process // non-traceable author statement	16020 // membrane // inferred from electronic annotation /// 16021 // integral to membrane // non-traceable author statement /// 16021 // integral to membrane // inferred from electronic annotation	5198 // structural molecule activity // non-traceable author statement	---
218473_s_at	154.976	139.662	0.901183	-0.150108	0.000234651	GLT25D1	NM_024656	glycosyltransferase 25 domain containing 1	9103 // lipopolysaccharide biosynthesis // inferred from electronic annotation	---	16740 // transferase activity // inferred from electronic annotation	---
211184_s_at	72.3108	59.2018	0.818713	-0.28857	0.000234977	USH1C	AB006955	Usher syndrome 1C (autosomal recessive, severe)	7242 // intracellular signaling cascade // non-traceable author statement /// 7601 // visual perception // inferred from electronic annotation /// 7605 // sensory perception of sound // inferred from electronic annotation /// 50896 // response to stimulus // inferred from electronic annotation	---	5515 // protein binding // non-traceable author statement /// 5515 // protein binding // inferred from electronic annotation	---
227626_at	61.5796	52.7818	0.857132	-0.222412	0.000236217	PAQR8	AI655524	progestin and adipoQ receptor family member VIII	7165 // signal transduction // inferred from electronic annotation /// 7186 // G-protein coupled receptor protein signaling pathway // inferred from electronic annotation	16020 // membrane // inferred from electronic annotation /// 16021 // integral to membrane // inferred from electronic annotation	4872 // receptor activity // inferred from electronic annotation /// 4930 // G-protein coupled receptor activity // inferred from electronic annotation /// 5496 // steroid binding // inferred from electronic annotation /// 8289 // lipid binding // inferred from electronic annotation /// 4871 // signal transducer activity // inferred from electronic annotation	---
238492_at	67.5804	51.9511	0.76873	-0.379451	0.000236513	---	BF941414	CDNA FLJ33148 fis, clone UTERU2000238	---	---	---	---
234867_at	77.6292	64.4969	0.830833	-0.26737	0.000239493	---	AE000661	T cell receptor V alpha gene segment V-alpha-w27, clone IGRa05	---	---	---	---
1555704_at	54.9449	44.6058	0.811828	-0.300755	0.000242981	CMTM3	AY166714	CKLF-like MARVEL transmembrane domain containing 3	6935 // chemotaxis // inferred from electronic annotation /// 50896 // response to stimulus // inferred from electronic annotation	5615 // extracellular space // inferred from electronic annotation /// 16020 // membrane // inferred from electronic annotation /// 16021 // integral to membrane // inferred from electronic annotation	5125 // cytokine activity // inferred from electronic annotation	---
215190_at	90.6661	72.7789	0.802713	-0.317043	0.000246934	PCID1	AV717062	PCI domain containing 1 (herpesvirus entry mediator)	---	---	---	---
240611_at	76.6102	65.5629	0.855798	-0.224657	0.000267238	---	T16451	---	---	---	---	---
208521_at	74.5761	61.4669	0.824217	-0.278904	0.00026914	OR5I1	NM_006637	olfactory receptor, family 5, subfamily I, member 1	7165 // signal transduction // non-traceable author statement /// 7186 // G-protein coupled receptor protein signaling pathway // inferred from electronic annotation /// 7608 // sensory perception of smell // inferred from electronic annotation /// 50896 // response to stimulus // inferred from electronic annotation /// 7165 // signal transduction // inferred from electronic annotation	5887 // integral to plasma membrane // not recorded /// 16020 // membrane // inferred from electronic annotation /// 16021 // integral to membrane // inferred from electronic annotation	4872 // receptor activity // inferred from electronic annotation /// 4984 // olfactory receptor activity // inferred from electronic annotation /// 1584 // rhodopsin-like receptor activity // inferred from electronic annotation /// 4871 // signal transducer activity // inferred from electronic annotation /// 4930 // G-protein coupled receptor activity // inferred from electronic annotation /// 48…	---
227815_at	514.899	415.164	0.8063	-0.310611	0.000273761	---	W60691	Transcribed locus, strongly similar to NP_075067.2 vacuolar protein sorting 33A [Homo sapiens]	---	---	---	---
236424_at	289.026	245.901	0.850793	-0.233121	0.000276303	---	BF511695	---	---	---	---	---
220357_s_at	244.592	202.56	0.828154	-0.27203	0.000278097	SGK2	NM_016276	serum/glucocorticoid regulated kinase 2	6468 // protein amino acid phosphorylation // inferred from electronic annotation /// 6468 // protein amino acid phosphorylation // non-traceable author statement /// 6979 // response to oxidative stress // traceable author statement /// 7243 // protein kinase cascade // traceable author statement /// 6468 // protein amino acid phosphorylation // traceable author statement	---	166 // nucleotide binding // inferred from electronic annotation /// 4674 // protein serine/threonine kinase activity // inferred from electronic annotation /// 4674 // protein serine/threonine kinase activity // traceable author statement /// 4682 // protein kinase CK2 activity // non-traceable author statement /// 5524 // ATP binding // inferred from electronic annotation /// 15459 // potassium…	---
237952_at	112.667	77.1022	0.684339	-0.547216	0.000279606	CREB3L2	AA033987	CAMP responsive element binding protein 3-like 2	6355 // regulation of transcription, DNA-dependent // inferred from electronic annotation	5634 // nucleus // inferred from electronic annotation	43565 // sequence-specific DNA binding // inferred from electronic annotation /// 46983 // protein dimerization activity // inferred from electronic annotation /// 3677 // DNA binding // inferred from electronic annotation	---
226599_at	173.686	147.86	0.851306	-0.232249	0.0002819	KIAA1727	AA527080	KIAA1727 protein	16043 // cell organization and biogenesis // inferred from electronic annotation /// 30036 // actin cytoskeleton organization and biogenesis // inferred from electronic annotation	---	3779 // actin binding // inferred from electronic annotation	---
202478_at	76.3533	65.9662	0.86396	-0.210964	0.000285431	TRIB2	NM_021643	tribbles homolog 2 (Drosophila)	6468 // protein amino acid phosphorylation // inferred from sequence or structural similarity /// 43405 // regulation of MAPK activity // inferred from sequence or structural similarity /// 6468 // protein amino acid phosphorylation // inferred from electronic annotation	5737 // cytoplasm // inferred from sequence or structural similarity	166 // nucleotide binding // inferred from sequence or structural similarity /// 4672 // protein kinase activity // inferred from sequence or structural similarity /// 4860 // protein kinase inhibitor activity // inferred from electronic annotation /// 5524 // ATP binding // inferred from electronic annotation /// 4672 // protein kinase activity // inferred from electronic annotation	---
1562785_at	220.895	183.946	0.832732	-0.264075	0.000287479	HERC6	BC027846	Hect domain and RLD 6	6512 // ubiquitin cycle // inferred from electronic annotation /// 6464 // protein modification // inferred from electronic annotation	5622 // intracellular // inferred from electronic annotation	3824 // catalytic activity // inferred from electronic annotation /// 4842 // ubiquitin-protein ligase activity // inferred from electronic annotation	---
224040_at	176.439	146.695	0.831421	-0.266348	0.000293832	TTTY5	AF332236	testis-specific transcript, Y-linked 5	---	---	---	---
1560596_at	100.875	85.6827	0.849391	-0.2355	0.000294781	GFPT1	AF086265	Glutamine-fructose-6-phosphate transaminase 1	5975 // carbohydrate metabolism // inferred from electronic annotation /// 6002 // fructose 6-phosphate metabolism // traceable author statement /// 6112 // energy reserve metabolism // traceable author statement /// 6541 // glutamine metabolism // inferred from electronic annotation /// 8152 // metabolism // inferred from electronic annotation /// 16051 // carbohydrate biosynthesis // inferred f…	5737 // cytoplasm // inferred from electronic annotation	4360 // glutamine-fructose-6-phosphate transaminase (isomerizing) activity // traceable author statement /// 5529 // sugar binding // inferred from electronic annotation /// 16740 // transferase activity // inferred from electronic annotation /// 4360 // glutamine-fructose-6-phosphate transaminase (isomerizing) activity // inferred from electronic annotation /// 8483 // transaminase activity // i…	Glutamate metabolism // KEGG /// Aminosugars metabolism // KEGG
205417_s_at	1148.73	1362.6	1.18618	0.246328	0.000295209	DAG1	NM_004393	dystroglycan 1 (dystrophin-associated glycoprotein 1)	6461 // protein complex assembly // traceable author statement /// 6936 // muscle contraction // traceable author statement	5578 // extracellular matrix (sensu Metazoa) // traceable author statement /// 5624 // membrane fraction // traceable author statement /// 5886 // plasma membrane // non-traceable author statement /// 5887 // integral to plasma membrane // traceable author statement /// 15629 // actin cytoskeleton // traceable author statement /// 5856 // cytoskeleton // inferred from electronic annotation /// 16…	5055 // laminin receptor activity // not recorded /// 5509 // calcium ion binding // inferred from electronic annotation /// 5515 // protein binding // inferred from physical interaction /// 5515 // protein binding // inferred from electronic annotation	---
1559021_at	101.558	81.7304	0.804769	-0.313354	0.000300093	---	BC041355	---	---	---	---	---
1559754_at	211.812	166.493	0.786041	-0.347323	0.000311901	LTB	BC018898	Lymphotoxin beta (TNF superfamily, member 3)	6955 // immune response // inferred from electronic annotation /// 7165 // signal transduction // traceable author statement /// 7267 // cell-cell signaling // traceable author statement	5615 // extracellular space // inferred from electronic annotation /// 16020 // membrane // inferred from electronic annotation /// 16021 // integral to membrane // inferred from electronic annotation	5164 // tumor necrosis factor receptor binding // inferred from electronic annotation /// 5125 // cytokine activity // inferred from electronic annotation /// 5102 // receptor binding // traceable author statement	---
212249_at	137.249	216.34	1.57626	0.656508	0.000312851	PIK3R1	AI934473	phosphoinositide-3-kinase, regulatory subunit 1 (p85 alpha)	7242 // intracellular signaling cascade // inferred from electronic annotation /// 7242 // intracellular signaling cascade // non-traceable author statement /// 8286 // insulin receptor signaling pathway // inferred from physical interaction /// 46854 // phosphoinositide phosphorylation // inferred from sequence or structural similarity /// 48009 // insulin-like growth factor receptor signaling p…	5942 // phosphoinositide 3-kinase complex // inferred from electronic annotation /// 35030 // phosphoinositide 3-kinase complex, class IA // inferred from sequence or structural similarity	5158 // insulin receptor binding // inferred from physical interaction /// 5159 // insulin-like growth factor receptor binding // inferred from physical interaction /// 5545 // phosphatidylinositol binding // non-traceable author statement /// 16301 // kinase activity // inferred from electronic annotation /// 19903 // protein phosphatase binding // inferred from physical interaction /// 35014 //…	---
208360_s_at	116.647	91.3786	0.783375	-0.352226	0.000320272	---	NM_015870	---	---	19031 // viral envelope // inferred from electronic annotation /// 16021 // integral to membrane // non-traceable author statement	8233 // peptidase activity // inferred from electronic annotation	---
231069_at	103.174	85.6916	0.830552	-0.267858	0.000320393	---	AI768895	Transcribed locus	---	---	---	---
233484_at	158.929	126.158	0.793803	-0.333146	0.000320439	---	AF131844	Clone 25015 mRNA sequence	---	---	---	---
233021_at	152.071	123.72	0.813563	-0.297673	0.000330596	---	AW292739	CDNA clone IMAGE:4825606	---	---	---	---
240653_at	153.661	128.496	0.836233	-0.258023	0.000332613	---	H15423	Transcribed locus	---	---	---	---
207252_at	129.353	107.576	0.83165	-0.265951	0.000333083	INE1	NM_003669	inactivation escape 1	---	---	---	Proteasome_Degradation // GenMAPP
238909_at	127.752	97.3861	0.762309	-0.391553	0.000341354	S100A10	BF126155	S100 calcium binding protein A10 (annexin II ligand, calpactin I, light polypeptide (p11))	---	---	5509 // calcium ion binding // inferred from electronic annotation	---
1560512_at	134.399	104.167	0.775058	-0.367623	0.000341573	INADL	BQ027635	InaD-like (Drosophila)	---	5923 // tight junction // inferred from electronic annotation /// 16020 // membrane // inferred from electronic annotation	5515 // protein binding // inferred from electronic annotation	---
1559069_at	180.24	149.871	0.831506	-0.266202	0.000350894	---	AL109717	MRNA full length insert cDNA clone EUROIMAGE 240968	---	---	---	---
1555187_at	61.6857	52.8236	0.856334	-0.223754	0.000351322	---	BC032019	---	---	---	---	---
239162_at	50.224	57.0222	1.13536	0.183147	0.000355781	DAPK1	H04394	Death-associated protein kinase 1	6468 // protein amino acid phosphorylation // inferred from direct assay /// 6915 // apoptosis // inferred from electronic annotation /// 7165 // signal transduction // inferred from electronic annotation /// 7243 // protein kinase cascade // inferred from direct assay /// 8624 // induction of apoptosis by extracellular signals // traceable author statement /// 6917 // induction of apoptosis // i…	15629 // actin cytoskeleton // inferred from expression pattern	166 // nucleotide binding // inferred from electronic annotation /// 4674 // protein serine/threonine kinase activity // inferred from electronic annotation /// 4684 // calmodulin-dependent protein kinase I activity // traceable author statement /// 4685 // calcium- and calmodulin-dependent protein kinase activity // inferred from direct assay /// 5516 // calmodulin binding // inferred from direc…	---
225880_at	131.628	159.293	1.21018	0.275222	0.000356707	---	BF676081	CDNA FLJ11174 fis, clone PLACE1007367	---	---	---	---
227393_at	89.1714	71.7271	0.804373	-0.314063	0.000358128	TMEM16J	AW084755	transmembrane protein 16J	---	---	---	---
235630_at	101.931	84.0397	0.824478	-0.278447	0.000358459	---	AI307772	Transcribed locus	---	---	---	---
243663_at	96.1198	78.4543	0.816214	-0.29298	0.000364323	---	AI150595	---	---	---	---	---
209378_s_at	366.92	325.424	0.886909	-0.173142	0.000365823	KIAA1128	AI478879	KIAA1128	---	---	---	---
226532_at	73.83	95.7726	1.2972	0.375405	0.000365853	LZIC	AL563613	Leucine zipper and CTNNBIP1 domain containing	7275 // development // inferred from electronic annotation	---	8013 // beta-catenin binding // inferred from electronic annotation	---
207916_at	60.8204	49.3223	0.81095	-0.302315	0.000368533	RBM	NM_005405	similar to RNA binding motif protein, Y chromosome, family 2 member B	---	---	---	---
1561452_at	84.7097	64.4662	0.761026	-0.393983	0.000373917	---	BC034301	CDNA FLJ35945 fis, clone TESTI2011915	---	---	---	---
244351_at	70.9154	54.2154	0.764508	-0.387396	0.00037938	MGC27016	BF980344	hypothetical protein MGC27016	---	---	166 // nucleotide binding // inferred from electronic annotation /// 3676 // nucleic acid binding // inferred from electronic annotation	---
234643_x_at	178.524	144.284	0.808205	-0.307207	0.000379695	---	AK025451	CDNA: FLJ21798 fis, clone HEP00573	---	---	---	---
235984_at	78.4168	64.2074	0.818797	-0.288422	0.00038307	---	AL036662	---	---	---	---	---
235248_at	272.665	218.785	0.802393	-0.317619	0.000386259	BTBD9	BF681515	BTB (POZ) domain containing 9	7155 // cell adhesion // inferred from electronic annotation	---	5515 // protein binding // inferred from electronic annotation	---
207482_at	133.486	106.515	0.797948	-0.325633	0.000386918	C20orf10	NM_014477	chromosome 20 open reading frame 10	7242 // intracellular signaling cascade // non-traceable author statement /// 30308 // negative regulation of cell growth // non-traceable author statement	---	---	---
239036_at	116.189	96.2506	0.828393	-0.271612	0.000388484	EIF2C1	BE771021	Eukaryotic translation initiation factor 2C, 1	6412 // protein biosynthesis // inferred from electronic annotation /// 6446 // regulation of translational initiation // traceable author statement	5850 // eukaryotic translation initiation factor 2 complex // traceable author statement	3743 // translation initiation factor activity // inferred from electronic annotation /// 3743 // translation initiation factor activity // traceable author statement /// 5515 // protein binding // inferred from physical interaction	---
216476_at	122.067	98.6203	0.807918	-0.307719	0.000393459	OR7E37P /// PJCG6 /// LOC650293 /// LOC650312	AL353580	olfactory receptor, family 7, subfamily E, member 37 pseudogene /// similar to olfactory receptor 873 /// seven transmembrane helix receptor /// similar to olfactory receptor 873	7186 // G-protein coupled receptor protein signaling pathway // inferred from electronic annotation	16021 // integral to membrane // inferred from electronic annotation	4872 // receptor activity // inferred from electronic annotation /// 4984 // olfactory receptor activity // inferred from electronic annotation	---
206257_at	115.902	104.93	0.905332	-0.143481	0.000411367	CCDC9	NM_015603	coiled-coil domain containing 9	---	---	---	---
206682_at	51.9226	43.72	0.842023	-0.248068	0.000415459	CLEC10A	NM_006344	C-type lectin domain family 10, member A	6897 // endocytosis // inferred from electronic annotation /// 6955 // immune response // inferred from electronic annotation	5886 // plasma membrane // traceable author statement /// 16021 // integral to membrane // inferred from electronic annotation /// 16020 // membrane // inferred from electronic annotation	5529 // sugar binding // traceable author statement /// 5529 // sugar binding // inferred from electronic annotation	---
240681_at	124.079	92.0352	0.741748	-0.431	0.00041995	---	AW118997	---	---	---	---	---
233234_at	108.518	88.7008	0.817384	-0.290914	0.00042984	KCTD16	AB037738	potassium channel tetramerisation domain containing 16	6813 // potassium ion transport // inferred from electronic annotation	8076 // voltage-gated potassium channel complex // inferred from electronic annotation /// 16020 // membrane // inferred from electronic annotation	5216 // ion channel activity // inferred from electronic annotation /// 5249 // voltage-gated potassium channel activity // inferred from electronic annotation /// 5515 // protein binding // inferred from electronic annotation	---
1570243_at	246.728	193.448	0.784051	-0.350981	0.000431767	LOC440731	BC013633	hypothetical LOC440731	---	---	---	---
226244_at	234.037	201.098	0.859257	-0.218839	0.00043296	CLEC14A	BF059395	C-type lectin domain family 14, member A	---	16020 // membrane // inferred from electronic annotation /// 16021 // integral to membrane // inferred from electronic annotation	5529 // sugar binding // inferred from electronic annotation	---
208523_x_at	136.057	101.149	0.743427	-0.427737	0.000435398	HIST1H2BI	NM_003525	histone 1, H2bi	6334 // nucleosome assembly // inferred from electronic annotation /// 7001 // chromosome organization and biogenesis (sensu Eukaryota) // inferred from electronic annotation	786 // nucleosome // inferred from electronic annotation /// 5634 // nucleus // inferred from electronic annotation /// 5694 // chromosome // inferred from electronic annotation	3677 // DNA binding // inferred from electronic annotation	---
1563781_at	176.141	146.249	0.830295	-0.268303	0.000435782	LOC285949	AK096687	hypothetical protein LOC285949	---	---	---	---
212649_at	58.3833	66.8022	1.1442	0.19434	0.000441044	---	AL079292	---	---	---	---	---
241756_at	187.264	153.591	0.820186	-0.285976	0.000446622	SMARCA2	T51136	SWI/SNF related, matrix associated, actin dependent regulator of chromatin, subfamily a, member 2	6350 // transcription // inferred from electronic annotation /// 6357 // regulation of transcription from RNA polymerase II promoter // traceable author statement /// 6355 // regulation of transcription, DNA-dependent // inferred from electronic annotation /// 6355 // regulation of transcription, DNA-dependent // traceable author statement	5634 // nucleus // inferred from electronic annotation /// 5654 // nucleoplasm // traceable author statement	166 // nucleotide binding // inferred from electronic annotation /// 3677 // DNA binding // inferred from electronic annotation /// 3713 // transcription coactivator activity // traceable author statement /// 4386 // helicase activity // inferred from electronic annotation /// 4386 // helicase activity // traceable author statement /// 5515 // protein binding // inferred from physical interaction…	---
237739_at	300.025	241.632	0.805372	-0.312273	0.000451477	HBG1	H71146	Hemoglobin, gamma A	6810 // transport // inferred from electronic annotation /// 15671 // oxygen transport // inferred from electronic annotation	5833 // hemoglobin complex // inferred from electronic annotation	5344 // oxygen transporter activity // inferred from electronic annotation /// 5506 // iron ion binding // inferred from electronic annotation /// 19825 // oxygen binding // inferred from electronic annotation /// 20037 // heme binding // inferred from electronic annotation /// 46872 // metal ion binding // inferred from electronic annotation /// 5488 // binding // inferred from electronic annota…	---
36888_at	441.944	376.608	0.852161	-0.230802	0.000452687	---	AB020648	---	---	---	---	---
227271_at	263.624	197.311	0.748458	-0.418006	0.000453436	FGF11	AU151265	fibroblast growth factor 11	7165 // signal transduction // traceable author statement /// 7267 // cell-cell signaling // traceable author statement /// 7399 // nervous system development // traceable author statement	5615 // extracellular space // not recorded	8083 // growth factor activity // traceable author statement /// 8083 // growth factor activity // inferred from electronic annotation	---
239196_at	185.591	153.048	0.824651	-0.278144	0.000453696	ANKRD22	AI097229	ankyrin repeat domain 22	---	---	---	---
1556580_a_at	54.4936	65.6653	1.20501	0.269046	0.000455169	---	BE044068	CDNA FLJ30798 fis, clone FEBRA2001161	---	---	---	---
200961_at	326.183	404.821	1.24108	0.311601	0.000460619	SEPHS2	NM_012248	selenophosphate synthetase 2	16260 // selenocysteine biosynthesis // non-traceable author statement	---	166 // nucleotide binding // inferred from electronic annotation /// 3824 // catalytic activity // inferred from electronic annotation /// 4756 // selenide, water dikinase activity // inferred from electronic annotation /// 4756 // selenide, water dikinase activity // non-traceable author statement /// 5524 // ATP binding // inferred from electronic annotation /// 8430 // selenium binding // infe…	---
237399_at	79.1614	63.1629	0.7979	-0.325721	0.000465947	MTA3	AW594033	Metastasis associated 1 family, member 3	6355 // regulation of transcription, DNA-dependent // inferred from electronic annotation	5634 // nucleus // inferred from electronic annotation	3700 // transcription factor activity // inferred from electronic annotation /// 8270 // zinc ion binding // inferred from electronic annotation /// 43565 // sequence-specific DNA binding // inferred from electronic annotation /// 46872 // metal ion binding // inferred from electronic annotation /// 3677 // DNA binding // inferred from electronic annotation	---
207544_s_at	102.889	88.1442	0.856689	-0.223157	0.000466015	ADH6	NM_000672	alcohol dehydrogenase 6 (class V)	6069 // ethanol oxidation // traceable author statement	---	4022 // alcohol dehydrogenase activity // inferred from electronic annotation /// 4022 // alcohol dehydrogenase activity // traceable author statement /// 8270 // zinc ion binding // inferred from electronic annotation /// 16491 // oxidoreductase activity // inferred from electronic annotation /// 46872 // metal ion binding // inferred from electronic annotation	Glycolysis / Gluconeogenesis // KEGG /// Fatty acid metabolism // KEGG /// Bile acid biosynthesis // KEGG /// Tyrosine metabolism // KEGG /// Glycerolipid metabolism // KEGG /// 1- and 2-Methylnaphthalene degradation // KEGG /// Metabolism of xenobiotics by cytochrome P450 // KEGG
1566442_at	60.589	43.9924	0.72608	-0.4618	0.000467499	---	AL833174	---	---	---	---	---
240332_at	95.6139	80.3624	0.840489	-0.250699	0.000469601	---	AI700768	Transcribed locus	---	---	---	---
1561135_at	114.012	95.8432	0.840642	-0.250437	0.000473538	FLJ34870	AF085980	FLJ34870 protein	---	---	---	---
1556365_at	165.824	137.359	0.82834	-0.271705	0.000476998	RP3-398D13.1	BC031936	Hypothetical protein FLJ33708	---	---	---	---
219827_at	803.025	340.775	0.424365	-1.23662	0.000491178	UCP3	NM_003356	uncoupling protein 3 (mitochondrial, proton carrier)	6091 // generation of precursor metabolites and energy // not recorded /// 6629 // lipid metabolism // traceable author statement /// 6810 // transport // inferred from electronic annotation /// 6839 // mitochondrial transport // inferred from electronic annotation /// 7585 // respiratory gaseous exchange // traceable author statement /// 15992 // proton transport // traceable author statement	5624 // membrane fraction // not recorded /// 5739 // mitochondrion // traceable author statement /// 5743 // mitochondrial inner membrane // traceable author statement /// 16020 // membrane // inferred from electronic annotation /// 16021 // integral to membrane // inferred from electronic annotation /// 5739 // mitochondrion // inferred from electronic annotation /// 5743 // mitochondrial inner…	5215 // transporter activity // traceable author statement /// 5488 // binding // inferred from electronic annotation /// 5215 // transporter activity // inferred from electronic annotation	Electron_Transport_Chain // GenMAPP /// Circadian_Exercise // GenMAPP
205147_x_at	116.361	94.1717	0.809306	-0.305243	0.000491554	NCF4	NM_000631	neutrophil cytosolic factor 4, 40kDa	6118 // electron transport // inferred from electronic annotation /// 6952 // defense response // traceable author statement /// 7242 // intracellular signaling cascade // inferred from electronic annotation	5829 // cytosol // traceable author statement	5515 // protein binding // inferred from electronic annotation /// 35091 // phosphoinositide binding // inferred from electronic annotation	---
1558703_at	327.086	253.631	0.775426	-0.366939	0.000491574	HCP1	AL832613	heme carrier protein 1	6810 // transport // inferred from electronic annotation	16020 // membrane // inferred from electronic annotation /// 16021 // integral to membrane // inferred from electronic annotation	5215 // transporter activity // inferred from electronic annotation	---
226030_at	569.681	443.533	0.778563	-0.361115	0.000495359	ACADSB	BE897866	acyl-Coenzyme A dehydrogenase, short/branched chain	6118 // electron transport // inferred from electronic annotation /// 6629 // lipid metabolism // inferred from electronic annotation /// 6631 // fatty acid metabolism // traceable author statement /// 6631 // fatty acid metabolism // inferred from electronic annotation /// 6091 // generation of precursor metabolites and energy // not recorded	5739 // mitochondrion // traceable author statement /// 5739 // mitochondrion // inferred from electronic annotation	3995 // acyl-CoA dehydrogenase activity // traceable author statement /// 16491 // oxidoreductase activity // inferred from electronic annotation /// 3995 // acyl-CoA dehydrogenase activity // inferred from electronic annotation	Fatty_Acid_Degradation // GenMAPP /// Fatty_Acid_Degradation // GenMAPP /// Fatty acid metabolism // KEGG /// Valine, leucine and isoleucine degradation // KEGG /// beta-Alanine metabolism // KEGG /// Propanoate metabolism // KEGG
1560187_at	126.807	101.596	0.801184	-0.319794	0.000500602	LOC647149	BC042094	hypothetical protein LOC647149	---	---	---	---
1558688_at	446.819	379.941	0.850325	-0.233914	0.000505915	LOC441461	BG701300	hypothetical gene supported by BC030123	---	---	---	---
238685_at	81.9259	69.204	0.844715	-0.243464	0.000515078	LOC645818	AI031681	hypothetical protein LOC645818	---	---	---	---
234499_at	142.9	122.774	0.859161	-0.219	0.00052486	---	AL050063	MRNA; cDNA DKFZp566K203 (from clone DKFZp566K203)	---	---	---	---
208241_at	61.3791	52.9689	0.862979	-0.212603	0.000532186	NRG1	NM_004495	neuregulin 1	7399 // nervous system development // non-traceable author statement /// 9790 // embryonic development // inferred from electronic annotation /// 16481 // negative regulation of transcription // inferred from direct assay /// 30154 // cell differentiation // non-traceable author statement	5576 // extracellular region // non-traceable author statement /// 16020 // membrane // non-traceable author statement /// 16021 // integral to membrane // inferred from electronic annotation /// 16020 // membrane // inferred from electronic annotation	3712 // transcription cofactor activity // inferred from direct assay /// 5102 // receptor binding // inferred from electronic annotation /// 8083 // growth factor activity // inferred from electronic annotation /// 8083 // growth factor activity // non-traceable author statement /// 30297 // transmembrane receptor protein tyrosine kinase activator activity // non-traceable author statement /// 3…	---
242992_at	89.7823	74.742	0.83248	-0.264512	0.000532548	ZNF551	BF797956	Zinc finger protein 551	6350 // transcription // inferred from electronic annotation /// 6355 // regulation of transcription, DNA-dependent // inferred from electronic annotation	5634 // nucleus // inferred from electronic annotation /// 5622 // intracellular // inferred from electronic annotation	3677 // DNA binding // inferred from electronic annotation /// 8270 // zinc ion binding // inferred from electronic annotation /// 46872 // metal ion binding // inferred from electronic annotation /// 3676 // nucleic acid binding // inferred from electronic annotation	---
236566_at	125.896	109.617	0.870691	-0.199768	0.000533168	CCAR1	AI291189	Cell division cycle and apoptosis regulator 1	---	---	3677 // DNA binding // inferred from electronic annotation /// 5509 // calcium ion binding // inferred from electronic annotation /// 3676 // nucleic acid binding // inferred from electronic annotation	---
236090_at	132.562	114.233	0.861739	-0.214677	0.000534335	---	AW204095	Transcribed locus	---	---	---	---
205862_at	69.3258	52.7166	0.760418	-0.395136	0.000538096	GREB1	NM_014668	GREB1 protein	---	---	---	---
235366_at	94.2137	79.4071	0.842841	-0.246668	0.000539164	ZNF10	BF970692	zinc finger protein 10	6350 // transcription // inferred from electronic annotation /// 6355 // regulation of transcription, DNA-dependent // inferred from electronic annotation	5634 // nucleus // inferred from electronic annotation /// 5622 // intracellular // inferred from electronic annotation	3677 // DNA binding // inferred from electronic annotation /// 8270 // zinc ion binding // inferred from electronic annotation /// 46872 // metal ion binding // inferred from electronic annotation /// 3676 // nucleic acid binding // inferred from electronic annotation	---
210883_x_at	131.741	111.598	0.847101	-0.239393	0.000540829	EFNB3	U57001	ephrin-B3	7267 // cell-cell signaling // traceable author statement /// 7399 // nervous system development // traceable author statement /// 30154 // cell differentiation // inferred from electronic annotation /// 7275 // development // inferred from electronic annotation /// 7399 // nervous system development // inferred from electronic annotation	5887 // integral to plasma membrane // traceable author statement /// 16020 // membrane // inferred from electronic annotation /// 16021 // integral to membrane // inferred from electronic annotation	5005 // transmembrane-ephrin receptor activity // traceable author statement	---
203797_at	224.297	182.701	0.814549	-0.295927	0.000550586	VSNL1	AF039555	visinin-like 1	---	---	5509 // calcium ion binding // inferred from electronic annotation	---
229385_s_at	139.662	108.348	0.775786	-0.366268	0.00055406	---	AI743780	---	---	---	---	---
225461_at	91.3628	106.568	1.16642	0.222091	0.00056277	EHMT1	BE504570	euchromatic histone-lysine N-methyltransferase 1	16568 // chromatin modification // inferred from direct assay /// 16568 // chromatin modification // inferred from electronic annotation /// 16571 // histone methylation // inferred from direct assay	5634 // nucleus // Unknown /// 5634 // nucleus // inferred from electronic annotation	8168 // methyltransferase activity // inferred from direct assay /// 8270 // zinc ion binding // inferred from electronic annotation /// 16740 // transferase activity // inferred from electronic annotation /// 18024 // histone-lysine N-methyltransferase activity // inferred from direct assay /// 18024 // histone-lysine N-methyltransferase activity // inferred from electronic annotation /// 8168 /…	Lysine degradation // KEGG
234506_at	233.311	182.971	0.784237	-0.350639	0.000577324	---	AL049283	MRNA; cDNA DKFZp564M163 (from clone DKFZp564M163)	---	---	---	---
234671_at	192.36	157.644	0.819526	-0.287139	0.000582393	KRTAP4-2	AJ406934	keratin associated protein 4-2	---	45095 // keratin filament // inferred from electronic annotation /// 5882 // intermediate filament // inferred from electronic annotation	---	---
239612_at	68.6514	56.6792	0.825609	-0.27647	0.00058355	---	AI765554	Transcribed locus	---	---	---	---
228404_at	63.8264	51.8931	0.813035	-0.298611	0.000588385	IRX2	AI928035	Iroquois homeobox protein 2	6355 // regulation of transcription, DNA-dependent // inferred from electronic annotation /// 6350 // transcription // inferred from electronic annotation /// 45449 // regulation of transcription // inferred from electronic annotation	5634 // nucleus // inferred from electronic annotation	3700 // transcription factor activity // inferred from electronic annotation /// 43565 // sequence-specific DNA binding // inferred from electronic annotation /// 3677 // DNA binding // inferred from electronic annotation	---
206846_s_at	411.278	347.653	0.845298	-0.242467	0.000590347	HDAC6	NM_006044	histone deacetylase 6	6350 // transcription // inferred from electronic annotation /// 6355 // regulation of transcription, DNA-dependent // inferred from electronic annotation /// 7049 // cell cycle // non-traceable author statement /// 7275 // development // non-traceable author statement /// 16568 // chromatin modification // inferred from electronic annotation /// 16575 // histone deacetylation // inferred from se…	118 // histone deacetylase complex // inferred from direct assay /// 5634 // nucleus // non-traceable author statement /// 5737 // cytoplasm // inferred from sequence or structural similarity /// 5874 // microtubule // inferred from direct assay /// 5634 // nucleus // inferred from electronic annotation	3779 // actin binding // inferred from electronic annotation /// 8270 // zinc ion binding // inferred from sequence or structural similarity /// 16566 // specific transcriptional repressor activity // inferred from sequence or structural similarity /// 16787 // hydrolase activity // inferred from electronic annotation /// 42826 // histone deacetylase binding // inferred from physical interaction …	Cell_cycle_KEGG // GenMAPP /// Cell_cycle_KEGG // GenMAPP /// Cell_cycle_KEGG // GenMAPP /// Cell_cycle_KEGG // GenMAPP /// Cell_cycle_KEGG // GenMAPP
235215_at	71.7682	90.8099	1.26532	0.339504	0.000602053	---	AI694544	Transcribed locus, moderately similar to NP_055301.1 neuronal thread protein AD7c-NTP [Homo sapiens]	---	---	---	---
242319_at	165.132	130.744	0.791752	-0.33688	0.000602223	DGKG	R60339	diacylglycerol kinase, gamma 90kDa	7205 // protein kinase C activation // inferred from electronic annotation /// 7242 // intracellular signaling cascade // inferred from electronic annotation /// 7165 // signal transduction // traceable author statement	---	4143 // diacylglycerol kinase activity // inferred from electronic annotation /// 4143 // diacylglycerol kinase activity // traceable author statement /// 5509 // calcium ion binding // inferred from electronic annotation /// 8270 // zinc ion binding // inferred from electronic annotation /// 16740 // transferase activity // inferred from electronic annotation /// 19992 // diacylglycerol binding …	Glycerolipid metabolism // KEGG /// Glycerophospholipid metabolism // KEGG /// Phosphatidylinositol signaling system // KEGG
231947_at	269.873	222.293	0.823693	-0.279821	0.000612311	MYCT1	AI242583	myc target 1	---	---	---	---
238115_at	163.242	136.769	0.837828	-0.255273	0.000614529	DNAJC18	T03492	DnaJ (Hsp40) homolog, subfamily C, member 18	6457 // protein folding // inferred from electronic annotation	---	31072 // heat shock protein binding // inferred from electronic annotation /// 51082 // unfolded protein binding // inferred from electronic annotation	---
237918_at	110.155	79.3453	0.720307	-0.473316	0.000622671	---	BE502455	Transcribed locus	---	---	---	---
1552915_at	107.648	94.5038	0.877896	-0.187878	0.00062877	IL28A	NM_172138	interleukin 28A (interferon, lambda 2)	9615 // response to virus // inferred from electronic annotation	5615 // extracellular space // inferred from electronic annotation	5125 // cytokine activity // inferred from electronic annotation	---
234185_at	109.861	85.7668	0.780687	-0.357184	0.000632177	---	AK026823	CDNA: FLJ23170 fis, clone LNG09984	---	---	---	---
244271_at	108.202	85.1839	0.787266	-0.345076	0.000634295	---	AI697709	Transcribed locus, weakly similar to NP_055301.1 neuronal thread protein AD7c-NTP [Homo sapiens]	---	---	---	---
238839_at	88.2113	71.9059	0.815155	-0.294854	0.000640696	OTX1	AI813505	orthodenticle homolog 1 (Drosophila)	6355 // regulation of transcription, DNA-dependent // non-traceable author statement /// 7275 // development // non-traceable author statement /// 6355 // regulation of transcription, DNA-dependent // inferred from electronic annotation /// 7275 // development // inferred from electronic annotation /// 45449 // regulation of transcription // inferred from electronic annotation	5634 // nucleus // non-traceable author statement /// 5634 // nucleus // inferred from electronic annotation	3700 // transcription factor activity // non-traceable author statement /// 43565 // sequence-specific DNA binding // inferred from electronic annotation /// 3677 // DNA binding // inferred from electronic annotation /// 3700 // transcription factor activity // inferred from electronic annotation	---
229612_at	363.54	263.894	0.725899	-0.462159	0.000650375	---	AW451455	Transcribed locus	---	---	---	---
1559002_at	168.129	143.537	0.853732	-0.228145	0.000654308	LOC340544	BC043382	hypothetical protein LOC340544	---	---	---	---
203080_s_at	145.31	132.409	0.911217	-0.134133	0.000654488	BAZ2B	NM_013450	bromodomain adjacent to zinc finger domain, 2B	6350 // transcription // inferred from electronic annotation /// 6355 // regulation of transcription, DNA-dependent // inferred from electronic annotation	5634 // nucleus // inferred from electronic annotation	3677 // DNA binding // inferred from electronic annotation /// 5515 // protein binding // inferred from electronic annotation /// 8270 // zinc ion binding // inferred from electronic annotation /// 46872 // metal ion binding // inferred from electronic annotation	---
221859_at	78.1987	66.8688	0.855114	-0.225811	0.000657123	SYT13	AW089736	synaptotagmin XIII	6810 // transport // inferred from electronic annotation	8021 // synaptic vesicle // inferred from electronic annotation /// 16020 // membrane // inferred from electronic annotation /// 16021 // integral to membrane // inferred from electronic annotation	5215 // transporter activity // inferred from electronic annotation	---
241346_at	109.382	93.4001	0.853889	-0.227879	0.000660315	ARHGAP30	AW974499	Rho GTPase activating protein 30	---	---	---	---
237453_at	139.189	111.923	0.804109	-0.314538	0.000662617	ZNF529	N62934	Zinc finger protein 529	6355 // regulation of transcription, DNA-dependent // inferred from electronic annotation	5622 // intracellular // inferred from electronic annotation /// 5634 // nucleus // inferred from electronic annotation	3676 // nucleic acid binding // inferred from electronic annotation /// 8270 // zinc ion binding // inferred from electronic annotation /// 46872 // metal ion binding // inferred from electronic annotation	---
243724_at	168.911	145.952	0.864077	-0.210767	0.000668987	---	AW979182	---	---	---	---	---
210325_at	62.7631	49.3003	0.785499	-0.348319	0.000675444	CD1A	M28825	CD1a molecule	19882 // antigen presentation // inferred from electronic annotation /// 6955 // immune response // non-traceable author statement	5887 // integral to plasma membrane // non-traceable author statement /// 16020 // membrane // inferred from electronic annotation /// 42612 // MHC class I protein complex // inferred from electronic annotation /// 16021 // integral to membrane // inferred from electronic annotation	30106 // MHC class I receptor activity // inferred from electronic annotation	---
243405_at	64.4646	51.895	0.805016	-0.312911	0.000677864	TXNDC5	AI097337	Thioredoxin domain containing 5	6118 // electron transport // inferred from electronic annotation /// 6916 // anti-apoptosis // traceable author statement	5783 // endoplasmic reticulum // traceable author statement /// 5783 // endoplasmic reticulum // inferred from electronic annotation	16853 // isomerase activity // inferred from electronic annotation /// 5515 // protein binding // inferred from physical interaction /// 16308 // 1-phosphatidylinositol-4-phosphate 5-kinase activity // inferred from electronic annotation	---
235621_at	179.859	154.282	0.857792	-0.2213	0.00068454	LOC285014	AA442882	hypothetical protein LOC285014	---	---	---	---
244589_at	56.0406	48.5199	0.8658	-0.207895	0.000689689	---	AI026951	---	---	---	---	---
214735_at	131.121	105.602	0.805384	-0.312252	0.000690074	PIP3-E	AW166711	phosphoinositide-binding protein PIP3-E	6979 // response to oxidative stress // inferred from sequence or structural similarity /// 15671 // oxygen transport // non-traceable author statement	5737 // cytoplasm // inferred from sequence or structural similarity	4601 // peroxidase activity // inferred from sequence or structural similarity /// 5344 // oxygen transporter activity // non-traceable author statement	---
233048_at	57.681	45.1041	0.781958	-0.354837	0.000690621	---	AK025471	---	---	---	---	---
227524_at	110.27	95.1848	0.863201	-0.212232	0.000692914	---	H06187	---	---	---	---	---
236069_at	128.612	111.554	0.867369	-0.205282	0.000695102	FLJ39005	AI002328	Hypothetical protein FLJ39005	---	---	---	---
202495_at	179.865	221.74	1.23282	0.301959	0.000697014	TBCC	NM_003192	tubulin-specific chaperone c	6457 // protein folding // inferred from electronic annotation /// 7023 // post-chaperonin tubulin folding pathway // traceable author statement /// 7025 // beta-tubulin folding // traceable author statement	5856 // cytoskeleton // traceable author statement /// 5874 // microtubule // traceable author statement	51082 // unfolded protein binding // inferred from electronic annotation /// 51087 // chaperone binding // traceable author statement	---
240104_at	131.417	111.589	0.849121	-0.235959	0.000700725	---	AI917371	Transcribed locus	---	---	---	---
1553453_at	115.761	97.0793	0.838617	-0.253916	0.000700915	ASB14	NM_130387	ankyrin repeat and SOCS box-containing 14	7242 // intracellular signaling cascade // inferred from electronic annotation	---	---	---
1566514_at	99.3493	76.8639	0.773673	-0.370204	0.000707945	CWF19L2	AL713739	CWF19-like 2, cell cycle control (S. pombe)	---	---	---	---
203817_at	156.626	132.192	0.844003	-0.24468	0.000713133	---	W93728	---	---	---	---	---
216622_at	86.5221	69.0491	0.798052	-0.325446	0.000717272	LAMB4	AF029325	laminin, beta 4	---	5578 // extracellular matrix (sensu Metazoa) // inferred from electronic annotation /// 5604 // basement membrane // inferred from electronic annotation	5198 // structural molecule activity // inferred from electronic annotation	---
1563587_at	149.022	127.368	0.854696	-0.226517	0.000718553	CDH4	AL834206	cadherin 4, type 1, R-cadherin (retinal)	7155 // cell adhesion // inferred from electronic annotation /// 7155 // cell adhesion // traceable author statement /// 7156 // homophilic cell adhesion // inferred from electronic annotation	5886 // plasma membrane // not recorded /// 16020 // membrane // inferred from electronic annotation /// 16021 // integral to membrane // inferred from electronic annotation	5509 // calcium ion binding // inferred from electronic annotation /// 5515 // protein binding // inferred from electronic annotation	---
1552889_a_at	420.936	356.333	0.846525	-0.240375	0.000729242	XTP7	NM_138568	protein 7 transactivated by hepatitis B virus X antigen (HBxAg)	---	---	---	---
200719_at	465.02	386.982	0.832183	-0.265027	0.000730662	SKP1A	BE964043	S-phase kinase-associated protein 1A (p19A)	6512 // ubiquitin cycle // inferred from electronic annotation	---	5515 // protein binding // inferred from physical interaction	---
1559995_at	380.44	300.77	0.790584	-0.339009	0.000730894	SAMD14	BG911806	Sterile alpha motif domain containing 14	---	---	---	---
229729_at	117.825	105.575	0.896032	-0.158378	0.000739798	C9orf127	BF507870	chromosome 9 open reading frame 127	7160 // cell-matrix adhesion // inferred from mutant phenotype /// 7346 // regulation of progression through mitotic cell cycle // traceable author statement	5886 // plasma membrane // inferred from direct assay /// 9986 // cell surface // inferred from direct assay /// 16020 // membrane // inferred from electronic annotation /// 16021 // integral to membrane // inferred from electronic annotation	5515 // protein binding // inferred from physical interaction	---
220467_at	80.551	64.8419	0.804979	-0.312976	0.000743746	FLJ21272	NM_025032	hypothetical protein FLJ21272	---	---	---	---
242232_at	64.2453	52.9719	0.824525	-0.278365	0.000745911	SRGAP2	AI652864	SLIT-ROBO Rho GTPase activating protein 2	30001 // metal ion transport // inferred from electronic annotation	---	5096 // GTPase activator activity // inferred from electronic annotation /// 46872 // metal ion binding // inferred from electronic annotation	---
238520_at	75.934	61.3352	0.807744	-0.30803	0.000753802	---	BF724270	MSTP020 (MST020)	---	---	---	---
202496_at	142.635	164.433	1.15283	0.20518	0.000758109	RCD-8	NM_014329	autoantigen	---	5634 // nucleus // inferred from direct assay /// 5737 // cytoplasm // traceable author statement	5515 // protein binding // inferred from physical interaction	---
222391_at	302.874	369.754	1.22082	0.287847	0.000762017	TMEM30A	AL080250	transmembrane protein 30A	---	16020 // membrane // inferred from electronic annotation	---	---
1559285_at	197.544	156.959	0.794551	-0.331789	0.000774122	---	BM662141	---	---	---	---	---
205688_at	153.069	126.877	0.828887	-0.270752	0.00077528	TFAP4	NM_003223	transcription factor AP-4 (activating enhancer binding protein 4)	6357 // regulation of transcription from RNA polymerase II promoter // traceable author statement /// 7275 // development // traceable author statement /// 45449 // regulation of transcription // inferred from electronic annotation /// 6350 // transcription // inferred from electronic annotation /// 6355 // regulation of transcription, DNA-dependent // inferred from electronic annotation	5634 // nucleus // inferred from electronic annotation	3705 // RNA polymerase II transcription factor activity, enhancer binding // traceable author statement /// 3713 // transcription coactivator activity // traceable author statement /// 30528 // transcription regulator activity // inferred from electronic annotation /// 3677 // DNA binding // inferred from electronic annotation /// 3700 // transcription factor activity // traceable author statement	---
236369_at	116.206	100.379	0.863803	-0.211225	0.000775535	TSPYL3	AI971189	TSPY-like 3 (pseudogene)	6334 // nucleosome assembly // inferred from electronic annotation	5634 // nucleus // inferred from electronic annotation	---	---
229506_at	110.163	132.916	1.20654	0.270879	0.000780057	---	BF114646	CDNA clone IMAGE:5263177	---	---	---	---
237637_at	51.6043	37.5131	0.726937	-0.460097	0.000783818	CGNL1	BE669990	Cingulin-like 1	---	16459 // myosin // inferred from electronic annotation	3774 // motor activity // inferred from electronic annotation	---
233956_at	107.176	92.8661	0.866481	-0.206761	0.000787468	---	AA969211	Clone 1580375, mRNA sequence	---	---	---	---
208477_at	61.7977	53.6434	0.86805	-0.20415	0.000794276	KCNC1	NM_004976	potassium voltage-gated channel, Shaw-related subfamily, member 1	6812 // cation transport // inferred from electronic annotation /// 6813 // potassium ion transport // traceable author statement /// 6810 // transport // inferred from electronic annotation /// 6811 // ion transport // inferred from electronic annotation /// 6813 // potassium ion transport // inferred from electronic annotation	5624 // membrane fraction // not recorded /// 8076 // voltage-gated potassium channel complex // traceable author statement /// 16020 // membrane // inferred from electronic annotation /// 16021 // integral to membrane // inferred from electronic annotation /// 8076 // voltage-gated potassium channel complex // inferred from electronic annotation	5249 // voltage-gated potassium channel activity // traceable author statement /// 5515 // protein binding // inferred from electronic annotation /// 30955 // potassium ion binding // inferred from electronic annotation /// 5216 // ion channel activity // inferred from electronic annotation /// 5244 // voltage-gated ion channel activity // inferred from electronic annotation /// 5249 // voltage-g…	---
214275_at	71.876	60.824	0.846235	-0.240869	0.000797224	MED12	AI217362	Mediator of RNA polymerase II transcription, subunit 12 homolog (S. cerevisiae)	6265 // DNA topological change // inferred from electronic annotation /// 6268 // DNA unwinding during replication // inferred from electronic annotation /// 6350 // transcription // inferred from electronic annotation /// 6355 // regulation of transcription, DNA-dependent // inferred from electronic annotation /// 6367 // transcription initiation from RNA polymerase II promoter // inferred from …	119 // mediator complex // inferred from direct assay /// 5634 // nucleus // inferred from direct assay /// 5694 // chromosome // inferred from electronic annotation /// 5634 // nucleus // inferred from electronic annotation	3677 // DNA binding // inferred from electronic annotation /// 3918 // DNA topoisomerase (ATP-hydrolyzing) activity // inferred from electronic annotation /// 4872 // receptor activity // inferred from direct assay /// 5524 // ATP binding // inferred from electronic annotation /// 16455 // RNA polymerase II transcription mediator activity // inferred from direct assay /// 30374 // ligand-dependen…	---
1554616_at	192.776	164.727	0.854499	-0.226849	0.000798449	SERPINB8	BC034528	serpin peptidase inhibitor, clade B (ovalbumin), member 8	---	5829 // cytosol // traceable author statement	4867 // serine-type endopeptidase inhibitor activity // inferred from electronic annotation /// 4867 // serine-type endopeptidase inhibitor activity // traceable author statement /// 5515 // protein binding // traceable author statement /// 4866 // endopeptidase inhibitor activity // inferred from electronic annotation	---
209566_at	138.707	154.459	1.11356	0.155183	0.000799563	INSIG2	AL080184	insulin induced gene 2	---	---	---	---
48825_at	261.654	224.555	0.858214	-0.22059	0.000810162	ING4	AA887083	inhibitor of growth family, member 4	6473 // protein amino acid acetylation // inferred from direct assay /// 6915 // apoptosis // inferred from direct assay /// 7049 // cell cycle // inferred from electronic annotation /// 7050 // cell cycle arrest // inferred from direct assay /// 8285 // negative regulation of cell proliferation // inferred from direct assay /// 45892 // negative regulation of transcription, DNA-dependent // infe…	5634 // nucleus // inferred from direct assay /// 5634 // nucleus // inferred from electronic annotation	5515 // protein binding // inferred from physical interaction /// 8270 // zinc ion binding // inferred from electronic annotation /// 46872 // metal ion binding // inferred from electronic annotation /// 5515 // protein binding // inferred from electronic annotation	---
1565611_at	269.709	229.817	0.852094	-0.230915	0.000812179	DYNLRB1	BG056174	Dynein, light chain, roadblock-type 1	7018 // microtubule-based movement // non-traceable author statement /// 7632 // visual behavior // inferred from sequence or structural similarity /// 8090 // retrograde axon cargo transport // inferred from sequence or structural similarity	5737 // cytoplasm // inferred from sequence or structural similarity /// 5868 // cytoplasmic dynein complex // non-traceable author statement /// 5874 // microtubule // inferred from electronic annotation /// 30286 // dynein complex // inferred from electronic annotation	3777 // microtubule motor activity // non-traceable author statement /// 5515 // protein binding // non-traceable author statement /// 5515 // protein binding // inferred from physical interaction /// 3774 // motor activity // inferred from electronic annotation	---
203388_at	198.125	172.342	0.869867	-0.201133	0.000812868	ARRB2	NM_004313	arrestin, beta 2	7165 // signal transduction // inferred from electronic annotation /// 7600 // sensory perception // inferred from electronic annotation /// 50896 // response to stimulus // inferred from electronic annotation	5634 // nucleus // inferred from electronic annotation /// 5737 // cytoplasm // traceable author statement /// 5886 // plasma membrane // traceable author statement	---	Calcium_regulation_in_cardiac_cells // GenMAPP /// Smooth_muscle_contraction // GenMAPP
214381_at	77.6482	65.88	0.848442	-0.237112	0.000815355	LOC441601 /// LOC652471	BG150564	septin 7 pseudogene /// similar to septin 7	7049 // cell cycle // inferred from electronic annotation	---	166 // nucleotide binding // inferred from electronic annotation /// 5525 // GTP binding // inferred from electronic annotation	---
228295_at	68.0413	60.646	0.891311	-0.165999	0.000817105	WDR59	AI703131	WD repeat domain 59	---	---	5198 // structural molecule activity // inferred from electronic annotation	---
1570295_at	106.195	83.2324	0.78377	-0.351498	0.000835268	VPS13A	BC038964	Vacuolar protein sorting 13 homolog A (S. cerevisiae)	6895 // Golgi to endosome transport // non-traceable author statement /// 8104 // protein localization // non-traceable author statement /// 8104 // protein localization // inferred from electronic annotation	5622 // intracellular // non-traceable author statement	5478 // intracellular transporter activity // non-traceable author statement	---
212990_at	99.503	116.692	1.17275	0.229899	0.000837098	SYNJ1	AB020717	synaptojanin 1	6796 // phosphate metabolism // traceable author statement /// 48488 // synaptic vesicle endocytosis // traceable author statement /// 6897 // endocytosis // inferred from electronic annotation	---	166 // nucleotide binding // inferred from electronic annotation /// 3723 // RNA binding // inferred from electronic annotation /// 4439 // phosphoinositide 5-phosphatase activity // inferred from electronic annotation /// 4445 // inositol-polyphosphate 5-phosphatase activity // traceable author statement /// 16787 // hydrolase activity // inferred from electronic annotation /// 3676 // nucleic a…	---
223907_s_at	117.134	102.752	0.877214	-0.188999	0.000844656	PINX1	AF205718	PIN2-interacting protein 1	723 // telomere maintenance // inferred from electronic annotation /// 7049 // cell cycle // inferred from electronic annotation /// 8285 // negative regulation of cell proliferation // non-traceable author statement /// 45786 // negative regulation of progression through cell cycle // inferred from electronic annotation	781 // chromosome, telomeric region // inferred from electronic annotation /// 5634 // nucleus // inferred from electronic annotation /// 5622 // intracellular // inferred from electronic annotation /// 5694 // chromosome // inferred from electronic annotation	3676 // nucleic acid binding // inferred from electronic annotation	---
227002_at	327.581	387.689	1.18349	0.243048	0.000858717	FAM78A	BF515132	family with sequence similarity 78, member A	---	---	---	---
1554659_at	135.352	119.163	0.880389	-0.183788	0.00086327	NEK4	BC037286	NIMA (never in mitosis gene a)-related kinase 4	6468 // protein amino acid phosphorylation // inferred from electronic annotation /// 6468 // protein amino acid phosphorylation // traceable author statement /// 7049 // cell cycle // inferred from electronic annotation /// 7067 // mitosis // inferred from electronic annotation /// 51301 // cell division // inferred from electronic annotation	5634 // nucleus // inferred from electronic annotation	166 // nucleotide binding // inferred from electronic annotation /// 287 // magnesium ion binding // inferred from electronic annotation /// 4674 // protein serine/threonine kinase activity // inferred from electronic annotation /// 4674 // protein serine/threonine kinase activity // traceable author statement /// 5524 // ATP binding // inferred from electronic annotation /// 16740 // transferase…	---
1562888_at	110.904	97.8478	0.882274	-0.180702	0.00086959	FLJ90231	BC011001	hypothetical protein FLJ90231	5975 // carbohydrate metabolism // inferred from electronic annotation	9341 // beta-galactosidase complex // inferred from electronic annotation	4565 // beta-galactosidase activity // inferred from electronic annotation	---
212779_at	664.36	486.311	0.731999	-0.450086	0.000870114	KIAA1109	AB029032	KIAA1109	6508 // proteolysis // inferred from electronic annotation	---	3824 // catalytic activity // inferred from electronic annotation /// 4190 // aspartic-type endopeptidase activity // inferred from electronic annotation	---
244234_at	186.612	156.971	0.841165	-0.249539	0.000901704	FAM62A	AI913928	Family with sequence similarity 62 (C2 domain containing), member A	---	---	---	---
213253_at	48.6059	60.8929	1.25279	0.325143	0.000905515	SMC2L1	AU154486	SMC2 structural maintenance of chromosomes 2-like 1 (yeast)	7049 // cell cycle // inferred from electronic annotation /// 7067 // mitosis // inferred from electronic annotation /// 7076 // mitotic chromosome condensation // non-traceable author statement /// 51276 // chromosome organization and biogenesis // inferred from electronic annotation /// 51301 // cell division // inferred from electronic annotation /// 7076 // mitotic chromosome condensation // …	228 // nuclear chromosome // inferred from direct assay /// 796 // condensin complex // inferred from direct assay /// 796 // condensin complex // non-traceable author statement /// 5694 // chromosome // inferred from electronic annotation /// 5737 // cytoplasm // inferred from direct assay /// 5634 // nucleus // inferred from electronic annotation	166 // nucleotide binding // inferred from electronic annotation /// 5515 // protein binding // inferred from electronic annotation /// 5524 // ATP binding // inferred from electronic annotation /// 16887 // ATPase activity // inferred from electronic annotation /// 46982 // protein heterodimerization activity // inferred from physical interaction	---
235609_at	54.1473	46.5337	0.85939	-0.218615	0.000907253	---	BF056791	Transcribed locus	---	---	---	---
208155_x_at	64.8349	53.0123	0.817651	-0.290442	0.000909602	GAGE4 /// GAGE5 /// GAGE6 /// GAGE7B /// LOC645009 /// LOC645073	NM_001476	G antigen 4 /// G antigen 5 /// G antigen 6 /// G antigen 7B /// similar to GAGE-4 protein (G antigen 4) /// similar to GAGE-1 protein (G antigen 1) (MZ2-F antigen)	6968 // cellular defense response // traceable author statement	---	5515 // protein binding // inferred from physical interaction	---
243944_at	198.317	176.749	0.891245	-0.166107	0.000913788	---	AI218254	---	---	---	---	---
1569172_a_at	93.5262	80.7631	0.863534	-0.211674	0.000914171	LOC441005	BC010180	hypothetical gene supported by BC010180	---	---	---	---
221914_at	67.2804	57.8683	0.860106	-0.217413	0.000920958	SYN1	H19843	synapsin I	7268 // synaptic transmission // traceable author statement /// 7269 // neurotransmitter secretion // inferred from electronic annotation	8021 // synaptic vesicle // inferred from electronic annotation /// 45202 // synapse // inferred from electronic annotation	3779 // actin binding // inferred from electronic annotation /// 5215 // transporter activity // traceable author statement	---
224678_at	145.354	124.814	0.858686	-0.219797	0.000922318	KIAA1219	AL132998	KIAA1219	---	---	5096 // GTPase activator activity // inferred from electronic annotation	---
1568620_at	53.493	44.2016	0.826305	-0.275253	0.000923178	CSAD	BC018042	cysteine sulfinic acid decarboxylase	19752 // carboxylic acid metabolism // inferred from electronic annotation	---	4782 // sulfinoalanine decarboxylase activity // inferred from electronic annotation /// 16829 // lyase activity // inferred from electronic annotation /// 16831 // carboxy-lyase activity // inferred from electronic annotation	---
243515_at	66.0391	52.8926	0.800928	-0.320256	0.000926232	C22orf23	AI740589	Chromosome 22 open reading frame 23	---	---	---	---
238449_at	242.998	194.042	0.798531	-0.32458	0.000937615	LOC440345	BG534511	hypothetical protein LOC440345	---	---	5488 // binding // inferred from electronic annotation	---
238571_at	189.781	152.444	0.803266	-0.316051	0.000938549	---	BF055200	Transcribed locus	---	---	---	---
1562505_at	222.671	197.682	0.887776	-0.171732	0.000952378	STK35	BC035700	Serine/threonine kinase 35	6468 // protein amino acid phosphorylation // inferred from electronic annotation	5634 // nucleus // inferred from electronic annotation	166 // nucleotide binding // inferred from electronic annotation /// 4674 // protein serine/threonine kinase activity // inferred from electronic annotation /// 5524 // ATP binding // inferred from electronic annotation /// 16740 // transferase activity // inferred from electronic annotation /// 4672 // protein kinase activity // inferred from electronic annotation /// 16301 // kinase activity //…	---
211692_s_at	131.853	119.756	0.908256	-0.138828	0.000953262	BBC3	AF332558	BCL2 binding component 3 /// BCL2 binding component 3	1836 // release of cytochrome c from mitochondria // inferred from direct assay /// 6915 // apoptosis // inferred from direct assay /// 6919 // caspase activation // inferred from direct assay /// 45926 // negative regulation of growth // inferred from mutant phenotype /// 6915 // apoptosis // inferred from electronic annotation	5739 // mitochondrion // inferred from direct assay /// 5739 // mitochondrion // inferred from electronic annotation	5515 // protein binding // inferred from physical interaction	---
219583_s_at	112.48	90.7561	0.806868	-0.309596	0.000954886	SPATA7	NM_018418	spermatogenesis associated 7	---	---	---	---
225357_s_at	135.347	149.795	1.10674	0.146322	0.000957891	INOC1	AI659419	INO80 complex homolog 1 (S. cerevisiae)	---	---	3677 // DNA binding // inferred from electronic annotation /// 4386 // helicase activity // inferred from electronic annotation /// 5524 // ATP binding // inferred from electronic annotation /// 3676 // nucleic acid binding // inferred from electronic annotation	---
232898_at	73.0452	62.089	0.850008	-0.234452	0.000960583	DAB2	R79120	disabled homolog 2, mitogen-responsive phosphoprotein (Drosophila)	8283 // cell proliferation // traceable author statement /// 6955 // immune response // inferred from electronic annotation /// 6957 // complement activation, alternative pathway // inferred from electronic annotation /// 6958 // complement activation, classical pathway // inferred from electronic annotation /// 19835 // cytolysis // inferred from electronic annotation /// 45087 // innate immune …	5579 // membrane attack complex // inferred from electronic annotation /// 16020 // membrane // inferred from electronic annotation /// 16021 // integral to membrane // inferred from electronic annotation /// 5887 // integral to plasma membrane // traceable author statement	---	Complement_Activation_Classical // GenMAPP
1566646_at	171.586	148.496	0.865436	-0.208502	0.000963386	LOC149086	AK057562	hypothetical protein LOC149086	---	---	3824 // catalytic activity // inferred from electronic annotation	---
202523_s_at	114.396	102.459	0.895648	-0.158996	0.000963742	SPOCK2	AI952009	sparc/osteonectin, cwcv and kazal-like domains proteoglycan (testican) 2	7416 // synaptogenesis // non-traceable author statement /// 30198 // extracellular matrix organization and biogenesis // non-traceable author statement /// 45595 // regulation of cell differentiation // non-traceable author statement	5578 // extracellular matrix (sensu Metazoa) // non-traceable author statement /// 5578 // extracellular matrix (sensu Metazoa) // inferred from electronic annotation	5509 // calcium ion binding // inferred from direct assay /// 5509 // calcium ion binding // inferred from electronic annotation	---
205432_at	254.547	206.333	0.810589	-0.302958	0.000964319	OVGP1	NM_002557	oviductal glycoprotein 1, 120kDa (mucin 9, oviductin)	5975 // carbohydrate metabolism // inferred from electronic annotation /// 6032 // chitin catabolism // inferred from electronic annotation /// 7338 // fertilization (sensu Metazoa) // inferred from electronic annotation /// 7565 // pregnancy // traceable author statement	5615 // extracellular space // not recorded	4568 // chitinase activity // inferred from electronic annotation /// 4553 // hydrolase activity, hydrolyzing O-glycosyl compounds // inferred from electronic annotation	---
1553872_at	98.8773	87.9548	0.889534	-0.168878	0.000968246	DKFZp762H185	NM_152914	hypothetical protein DKFZp762H185	---	---	---	---
243583_at	124.323	103.075	0.829088	-0.270402	0.000968289	TCF7L2	AI076315	Transcription factor 7-like 2 (T-cell specific, HMG-box)	74 // regulation of progression through cell cycle // traceable author statement /// 6325 // establishment and/or maintenance of chromatin architecture // non-traceable author statement /// 6350 // transcription // inferred from electronic annotation /// 6355 // regulation of transcription, DNA-dependent // inferred from electronic annotation /// 6357 // regulation of transcription from RNA polym…	5634 // nucleus // non-traceable author statement /// 5634 // nucleus // inferred from electronic annotation	3677 // DNA binding // inferred from electronic annotation /// 3700 // transcription factor activity // non-traceable author statement /// 3702 // RNA polymerase II transcription factor activity // traceable author statement /// 3677 // DNA binding // non-traceable author statement	---
203280_at	165.882	147.177	0.887244	-0.172597	0.000970733	SAFB2	NM_014649	scaffold attachment factor B2	6350 // transcription // inferred from electronic annotation /// 6355 // regulation of transcription, DNA-dependent // inferred from electronic annotation	5634 // nucleus // inferred from electronic annotation	166 // nucleotide binding // inferred from electronic annotation /// 3677 // DNA binding // inferred from electronic annotation /// 3723 // RNA binding // inferred from electronic annotation /// 3676 // nucleic acid binding // inferred from electronic annotation	---
214950_at	90.8236	82.2613	0.905727	-0.142852	0.000985088	IL9R /// LOC645582 /// LOC650233	L39064	interleukin 9 receptor /// similar to Interleukin-9 receptor precursor (IL-9R) (CD129 antigen) /// similar to Interleukin-9 receptor precursor (IL-9R) (CD129 antigen)	7165 // signal transduction // traceable author statement /// 8283 // cell proliferation // traceable author statement	5615 // extracellular space // traceable author statement /// 5887 // integral to plasma membrane // traceable author statement /// 16020 // membrane // inferred from electronic annotation /// 16021 // integral to membrane // inferred from electronic annotation	4872 // receptor activity // inferred from electronic annotation /// 4896 // hematopoietin/interferon-class (D200-domain) cytokine receptor activity // inferred from electronic annotation /// 4919 // interleukin-9 receptor activity // traceable author statement	---
233027_at	58.9757	45.2526	0.767309	-0.382121	0.000985182	RPS2	AI565818	Ribosomal protein S2	6412 // protein biosynthesis // inferred from electronic annotation /// 6412 // protein biosynthesis // traceable author statement /// 165 // MAPKKK cascade // inferred from mutant phenotype /// 46330 // positive regulation of JNK cascade // inferred from mutant phenotype /// 6468 // protein amino acid phosphorylation // inferred from direct assay /// 46329 // negative regulation of JNK cascade /…	5622 // intracellular // inferred from electronic annotation /// 5843 // cytosolic small ribosomal subunit (sensu Eukaryota) // traceable author statement /// 15935 // small ribosomal subunit // inferred from electronic annotation	3723 // RNA binding // traceable author statement /// 3735 // structural constituent of ribosome // inferred from electronic annotation /// 3735 // structural constituent of ribosome // traceable author statement /// 4674 // protein serine/threonine kinase activity // inferred from direct assay /// 16740 // transferase activity // inferred from direct assay /// 166 // nucleotide binding // inferr…	---
218322_s_at	102.605	83.1999	0.810872	-0.302454	0.000985935	ACSL5	NM_016234	acyl-CoA synthetase long-chain family member 5	6629 // lipid metabolism // inferred from electronic annotation /// 6631 // fatty acid metabolism // inferred from electronic annotation /// 8152 // metabolism // inferred from electronic annotation	16020 // membrane // inferred from electronic annotation /// 16021 // integral to membrane // inferred from electronic annotation	287 // magnesium ion binding // inferred from electronic annotation /// 3824 // catalytic activity // inferred from electronic annotation /// 4467 // long-chain-fatty-acid-CoA ligase activity // inferred from electronic annotation /// 16874 // ligase activity // inferred from electronic annotation	Fatty_Acid_Degradation // GenMAPP /// Fatty acid metabolism // KEGG /// Adipocytokine signaling pathway // KEGG
204830_x_at	103.326	78.6303	0.760995	-0.394041	0.000997736	PSG5	NM_002781	pregnancy specific beta-1-glycoprotein 5	7565 // pregnancy // traceable author statement /// 7565 // pregnancy // inferred from electronic annotation	5615 // extracellular space // not recorded	---	---
210052_s_at	168.374	140.023	0.831617	-0.266009	0.000999952	TPX2	AF098158	TPX2, microtubule-associated, homolog (Xenopus laevis)	7067 // mitosis // traceable author statement /// 8283 // cell proliferation // traceable author statement	5634 // nucleus // traceable author statement /// 5819 // spindle // traceable author statement /// 5634 // nucleus // inferred from electronic annotation	5524 // ATP binding // traceable author statement /// 5525 // GTP binding // traceable author statement	---
204228_at	357.82	299.434	0.836829	-0.256995	0.00100067	PPIH	NM_006347	peptidylprolyl isomerase H (cyclophilin H)	398 // nuclear mRNA splicing, via spliceosome // inferred from electronic annotation /// 6457 // protein folding // traceable author statement /// 6461 // protein complex assembly // traceable author statement /// 6608 // snRNP protein import into nucleus // traceable author statement /// 6397 // mRNA processing // inferred from electronic annotation /// 6457 // protein folding // inferred from e…	5681 // spliceosome complex // traceable author statement /// 5634 // nucleus // inferred from electronic annotation /// 5681 // spliceosome complex // inferred from electronic annotation	3755 // peptidyl-prolyl cis-trans isomerase activity // inferred from electronic annotation /// 16018 // cyclosporin A binding // traceable author statement /// 16853 // isomerase activity // inferred from electronic annotation /// 51082 // unfolded protein binding // inferred from electronic annotation	---
1557664_at	62.3831	47.9644	0.768869	-0.37919	0.00101247	LOC340239	BC042751	hypothetical protein LOC340239	---	---	---	---
1569323_at	57.5177	46.7038	0.81199	-0.300466	0.00101645	PTPRG	BU853579	protein tyrosine phosphatase, receptor type, G	6470 // protein amino acid dephosphorylation // inferred from electronic annotation /// 6730 // one-carbon compound metabolism // inferred from electronic annotation /// 7169 // transmembrane receptor protein tyrosine kinase signaling pathway // traceable author statement /// 6470 // protein amino acid dephosphorylation // not recorded	5887 // integral to plasma membrane // traceable author statement /// 16020 // membrane // inferred from electronic annotation /// 16021 // integral to membrane // inferred from electronic annotation	4089 // carbonate dehydratase activity // inferred from electronic annotation /// 4725 // protein tyrosine phosphatase activity // inferred from electronic annotation /// 5001 // transmembrane receptor protein tyrosine phosphatase activity // traceable author statement /// 8270 // zinc ion binding // inferred from electronic annotation /// 16787 // hydrolase activity // inferred from electronic a…	Cell adhesion molecules (CAMs) // KEGG /// Adherens junction // KEGG /// Jak-STAT signaling pathway // KEGG /// T cell receptor signaling pathway // KEGG /// B cell receptor signaling pathway // KEGG /// Leukocyte transendothelial migration // KEGG /// Insulin signaling pathway // KEGG /// Adipocytokine signaling pathway // KEGG /// Type I diabetes mellitus // KEGG /// Epithelial cell signaling i…
238181_at	125.89	105.646	0.839193	-0.252926	0.00102718	RGS13	AI911745	Regulator of G-protein signalling 13	9968 // negative regulation of signal transduction // inferred from electronic annotation	---	4871 // signal transducer activity // inferred from electronic annotation	---
1570479_at	86.9076	77.3132	0.889603	-0.168766	0.00103593	ART1	BC017828	ADP-ribosyltransferase 1	6471 // protein amino acid ADP-ribosylation // traceable author statement /// 6471 // protein amino acid ADP-ribosylation // inferred from electronic annotation	5886 // plasma membrane // non-traceable author statement /// 5887 // integral to plasma membrane // traceable author statement /// 16020 // membrane // inferred from electronic annotation	3950 // NAD+ ADP-ribosyltransferase activity // traceable author statement /// 3956 // NAD(P)+-protein-arginine ADP-ribosyltransferase activity // inferred from electronic annotation /// 16757 // transferase activity, transferring glycosyl groups // inferred from electronic annotation /// 16740 // transferase activity // inferred from electronic annotation	---
203431_s_at	93.7753	79.8956	0.851989	-0.231093	0.00103712	RICS	NM_014715	Rho GTPase-activating protein	---	---	5096 // GTPase activator activity // inferred from electronic annotation	---
233043_at	117.162	96.0712	0.819987	-0.286327	0.00103943	LOC221814	AL122087	Hypothetical protein LOC221814	---	---	---	---
223294_at	150.597	185.012	1.22852	0.29692	0.00105364	CXorf26	BC001220	chromosome X open reading frame 26	---	---	---	---
206912_at	59.781	45.7341	0.765028	-0.386416	0.00107221	FOXE1	NM_004473	forkhead box E1 (thyroid transcription factor 2)	122 // negative regulation of transcription from RNA polymerase II promoter // traceable author statement /// 6350 // transcription // inferred from electronic annotation /// 6355 // regulation of transcription, DNA-dependent // inferred from electronic annotation /// 6366 // transcription from RNA polymerase II promoter // traceable author statement /// 7398 // ectoderm development // traceable …	5634 // nucleus // inferred from electronic annotation	3700 // transcription factor activity // inferred from electronic annotation /// 3700 // transcription factor activity // traceable author statement /// 3702 // RNA polymerase II transcription factor activity // traceable author statement /// 43565 // sequence-specific DNA binding // inferred from electronic annotation /// 3677 // DNA binding // inferred from electronic annotation	---
207823_s_at	172.326	151.275	0.877838	-0.187974	0.00107374	AIF1	NM_004847	allograft inflammatory factor 1	6950 // response to stress // traceable author statement /// 6954 // inflammatory response // traceable author statement /// 7050 // cell cycle arrest // traceable author statement /// 8285 // negative regulation of cell proliferation // traceable author statement	5634 // nucleus // traceable author statement	5509 // calcium ion binding // inferred from electronic annotation	---
1566776_at	126.218	104.392	0.82708	-0.2739	0.00107467	DNAH1	AK093347	Dynein, axonemal, heavy polypeptide 1	1539 // ciliary or flagellar motility // non-traceable author statement /// 9612 // response to mechanical stimulus // non-traceable author statement /// 6457 // protein folding // inferred from electronic annotation /// 6986 // response to unfolded protein // inferred from electronic annotation /// 7018 // microtubule-based movement // inferred from electronic annotation	5858 // axonemal dynein complex // non-traceable author statement /// 30286 // dynein complex // non-traceable author statement /// 30286 // dynein complex // inferred from electronic annotation	3777 // microtubule motor activity // non-traceable author statement /// 3777 // microtubule motor activity // inferred from electronic annotation /// 5524 // ATP binding // inferred from electronic annotation /// 16887 // ATPase activity // inferred from electronic annotation	---
224115_at	62.6736	48.1663	0.768527	-0.379832	0.00107678	DCK	AF130108	Deoxycytidine kinase	6139 // nucleobase, nucleoside, nucleotide and nucleic acid metabolism // inferred from electronic annotation /// 6220 // pyrimidine nucleotide metabolism // traceable author statement	5634 // nucleus // inferred from electronic annotation	166 // nucleotide binding // inferred from electronic annotation /// 4137 // deoxycytidine kinase activity // traceable author statement /// 5524 // ATP binding // inferred from electronic annotation /// 16301 // kinase activity // inferred from electronic annotation /// 16740 // transferase activity // inferred from electronic annotation /// 16773 // phosphotransferase activity, alcohol group as…	Purine metabolism // KEGG /// Pyrimidine metabolism // KEGG
220596_at	105.58	96.003	0.909289	-0.13719	0.00108263	GPATC4	NM_015590	G patch domain containing 4	---	5622 // intracellular // inferred from electronic annotation	3676 // nucleic acid binding // inferred from electronic annotation	---
214996_at	63.3156	53.4041	0.84346	-0.245609	0.00108512	---	AL079294	MRNA full length insert cDNA clone EUROIMAGE 146729	---	---	---	---
202549_at	74.4059	88.6839	1.19189	0.253255	0.00109117	VAPB	AK025720	VAMP (vesicle-associated membrane protein)-associated protein B and C	6461 // protein complex assembly // traceable author statement	5887 // integral to plasma membrane // traceable author statement /// 16020 // membrane // inferred from electronic annotation /// 16021 // integral to membrane // inferred from electronic annotation	5198 // structural molecule activity // inferred from electronic annotation	---
1556891_at	101.559	81.8957	0.806388	-0.310454	0.00110029	SORCS1	BE328250	Sortilin-related VPS10 domain containing receptor 1	6886 // intracellular protein transport // inferred from electronic annotation /// 7218 // neuropeptide signaling pathway // non-traceable author statement	16020 // membrane // inferred from direct assay /// 16021 // integral to membrane // inferred from electronic annotation /// 16020 // membrane // inferred from electronic annotation	5515 // protein binding // inferred from direct assay /// 5515 // protein binding // inferred from physical interaction /// 8188 // neuropeptide receptor activity // non-traceable author statement /// 8565 // protein transporter activity // inferred from electronic annotation	---
218895_at	195.871	172.89	0.882675	-0.180046	0.0011046	GPATC3	NM_022078	G patch domain containing 3	---	5622 // intracellular // inferred from electronic annotation	3676 // nucleic acid binding // inferred from electronic annotation	---
244241_x_at	52.5686	38.9736	0.741385	-0.431705	0.00111275	---	AW166562	Transcribed locus, moderately similar to XP_512006.1 PREDICTED: similar to FLJ46489 protein [Pan troglodytes]	---	---	---	---
239897_at	150.529	128.988	0.8569	-0.222801	0.00112209	BCLAF1	AW152620	BCL2-associated transcription factor 1	6350 // transcription // inferred from electronic annotation /// 6355 // regulation of transcription, DNA-dependent // inferred from electronic annotation /// 6917 // induction of apoptosis // traceable author statement /// 16481 // negative regulation of transcription // inferred from direct assay /// 43065 // positive regulation of apoptosis // inferred from direct assay	5634 // nucleus // non-traceable author statement /// 5634 // nucleus // inferred from direct assay /// 5634 // nucleus // inferred from electronic annotation	3677 // DNA binding // inferred from direct assay /// 5515 // protein binding // inferred from physical interaction /// 16564 // transcriptional repressor activity // traceable author statement /// 16564 // transcriptional repressor activity // inferred from direct assay /// 3677 // DNA binding // inferred from electronic annotation	---
244096_at	64.5253	45.9853	0.712671	-0.488692	0.00113854	---	BE467068	---	---	---	---	---
1557845_at	63.4402	48.6939	0.767555	-0.381657	0.00114125	---	BC040571	CDNA clone IMAGE:5267399	---	---	---	---
240477_at	65.688	54.8564	0.835106	-0.259969	0.00115862	ETV1	R44780	Ets variant gene 1	6350 // transcription // inferred from electronic annotation /// 6355 // regulation of transcription, DNA-dependent // inferred from electronic annotation /// 6366 // transcription from RNA polymerase II promoter // traceable author statement	5634 // nucleus // inferred from electronic annotation	3700 // transcription factor activity // traceable author statement /// 43565 // sequence-specific DNA binding // inferred from electronic annotation /// 3677 // DNA binding // inferred from electronic annotation /// 3700 // transcription factor activity // inferred from electronic annotation	---
238395_at	156.838	127.796	0.814832	-0.295425	0.00116194	TRAM2	AI254013	Translocation associated membrane protein 2	6605 // protein targeting // inferred from electronic annotation /// 15031 // protein transport // inferred from electronic annotation /// 6810 // transport // inferred from electronic annotation	16020 // membrane // inferred from electronic annotation /// 16021 // integral to membrane // inferred from electronic annotation	---	---
205427_at	128.991	103.29	0.800754	-0.320569	0.00116535	ZNF354A	NM_005649	zinc finger protein 354A	6350 // transcription // inferred from electronic annotation /// 6357 // regulation of transcription from RNA polymerase II promoter // traceable author statement /// 7605 // sensory perception of sound // traceable author statement /// 6355 // regulation of transcription, DNA-dependent // inferred from electronic annotation	5634 // nucleus // inferred from electronic annotation /// 5622 // intracellular // inferred from electronic annotation	3677 // DNA binding // inferred from electronic annotation /// 3702 // RNA polymerase II transcription factor activity // traceable author statement /// 8270 // zinc ion binding // inferred from electronic annotation /// 46872 // metal ion binding // inferred from electronic annotation /// 3676 // nucleic acid binding // inferred from electronic annotation	---
210675_s_at	95.4821	65.7679	0.688798	-0.537847	0.0011759	PTPRR	U77917	protein tyrosine phosphatase, receptor type, R	1701 // embryonic development (sensu Mammalia) // inferred from expression pattern /// 6470 // protein amino acid dephosphorylation // traceable author statement /// 6470 // protein amino acid dephosphorylation // inferred from electronic annotation	9986 // cell surface // inferred from expression pattern /// 16020 // membrane // inferred from electronic annotation /// 16021 // integral to membrane // inferred from electronic annotation	4872 // receptor activity // inferred from electronic annotation /// 5001 // transmembrane receptor protein tyrosine phosphatase activity // traceable author statement /// 16787 // hydrolase activity // inferred from electronic annotation /// 19901 // protein kinase binding // inferred from sequence or structural similarity /// 4721 // phosphoprotein phosphatase activity // inferred from electron…	Cell adhesion molecules (CAMs) // KEGG /// Adherens junction // KEGG /// Jak-STAT signaling pathway // KEGG /// T cell receptor signaling pathway // KEGG /// B cell receptor signaling pathway // KEGG /// Leukocyte transendothelial migration // KEGG /// Insulin signaling pathway // KEGG /// Adipocytokine signaling pathway // KEGG /// Type I diabetes mellitus // KEGG /// Epithelial cell signaling i…
1553668_at	112.172	96.7722	0.862716	-0.213042	0.00117819	LRCH3	NM_032773	leucine-rich repeats and calponin homology (CH) domain containing 3	---	---	---	---
228612_at	271.636	228.52	0.841274	-0.249352	0.00118439	---	AI571730	CDNA clone IMAGE:5277380	---	---	---	---
239978_at	65.1451	51.32	0.78778	-0.344136	0.00118729	PITPNB	BF109370	Phosphatidylinositol transfer protein, beta	6629 // lipid metabolism // non-traceable author statement /// 6810 // transport // inferred from electronic annotation	5622 // intracellular // inferred from electronic annotation	8289 // lipid binding // inferred from electronic annotation /// 8526 // phosphatidylinositol transporter activity // not recorded	---
1553286_at	76.8083	64.577	0.840755	-0.250242	0.00119622	ZNF555	NM_152791	zinc finger protein 555	6355 // regulation of transcription, DNA-dependent // inferred from electronic annotation	5634 // nucleus // inferred from electronic annotation /// 5622 // intracellular // inferred from electronic annotation	3676 // nucleic acid binding // inferred from electronic annotation /// 8270 // zinc ion binding // inferred from electronic annotation	---
230799_at	126.33	103.159	0.816583	-0.292329	0.00120084	LOC150837	W72564	hypothetical protein LOC150837	---	---	---	---
236435_at	51.9058	44.4479	0.856319	-0.22378	0.001202	ZNF292	BE219036	Zinc finger protein 292	6350 // transcription // inferred from electronic annotation /// 6355 // regulation of transcription, DNA-dependent // inferred from electronic annotation	5634 // nucleus // inferred from electronic annotation	3677 // DNA binding // inferred from electronic annotation /// 8270 // zinc ion binding // inferred from electronic annotation /// 46872 // metal ion binding // inferred from electronic annotation /// 3676 // nucleic acid binding // inferred from electronic annotation	---
236574_at	147.581	124.49	0.843541	-0.24547	0.00120237	LOC284373	AI304870	Hypothetical protein LOC284373	---	---	---	---
234698_at	135.526	117.023	0.863473	-0.211777	0.00120339	HEMK2	AK021678	HemK methyltransferase family member 2	6306 // DNA methylation // inferred from electronic annotation	---	3677 // DNA binding // inferred from electronic annotation /// 8170 // N-methyltransferase activity // inferred from electronic annotation /// 8757 // S-adenosylmethionine-dependent methyltransferase activity // inferred from electronic annotation /// 16740 // transferase activity // inferred from electronic annotation /// 8168 // methyltransferase activity // inferred from electronic annotation	---
242907_at	124.971	109.016	0.872325	-0.197062	0.00120566	GBP2	BF509371	guanylate binding protein 2, interferon-inducible	6955 // immune response // traceable author statement /// 6955 // immune response // inferred from electronic annotation	16020 // membrane // inferred from electronic annotation	166 // nucleotide binding // inferred from electronic annotation /// 3924 // GTPase activity // inferred from electronic annotation /// 5525 // GTP binding // traceable author statement /// 5525 // GTP binding // inferred from electronic annotation	---
214558_at	86.7843	76.3194	0.879415	-0.185384	0.00120965	GPR12	NM_005288	G protein-coupled receptor 12	7165 // signal transduction // inferred from electronic annotation /// 7186 // G-protein coupled receptor protein signaling pathway // traceable author statement /// 7186 // G-protein coupled receptor protein signaling pathway // inferred from electronic annotation	5887 // integral to plasma membrane // traceable author statement /// 16020 // membrane // inferred from electronic annotation /// 16021 // integral to membrane // inferred from electronic annotation	1584 // rhodopsin-like receptor activity // inferred from electronic annotation /// 4872 // receptor activity // inferred from electronic annotation /// 16526 // G-protein coupled receptor activity, unknown ligand // inferred from electronic annotation /// 4871 // signal transducer activity // inferred from electronic annotation /// 4930 // G-protein coupled receptor activity // inferred from ele…	---
228889_at	225.455	178.088	0.789903	-0.340252	0.00121249	C14orf128	BF223658	chromosome 14 open reading frame 128	---	---	---	---
217654_at	68.5904	58.498	0.852859	-0.22962	0.0012128	CFLAR	R71245	CASP8 and FADD-like apoptosis regulator	6508 // proteolysis // inferred from electronic annotation /// 6916 // anti-apoptosis // traceable author statement /// 8624 // induction of apoptosis by extracellular signals // traceable author statement /// 42981 // regulation of apoptosis // inferred from electronic annotation /// 43123 // positive regulation of I-kappaB kinase/NF-kappaB cascade // inferred from expression pattern /// 6915 //…	---	4871 // signal transducer activity // inferred from expression pattern /// 5515 // protein binding // inferred from physical interaction /// 30693 // caspase activity // inferred from electronic annotation /// 5515 // protein binding // inferred from electronic annotation	---
216772_at	62.9029	50.9983	0.810747	-0.302676	0.00121692	---	AK025194	---	---	---	---	---
233354_at	151.633	134.665	0.888098	-0.171209	0.00121968	---	AK024250	CDNA FLJ14188 fis, clone NT2RP2005980	---	---	---	---
1557047_at	613.38	448.998	0.732007	-0.450071	0.00122006	YEATS2	BC032368	YEATS domain containing 2	6355 // regulation of transcription, DNA-dependent // inferred from electronic annotation	5634 // nucleus // inferred from electronic annotation	---	---
218427_at	91.3238	100.817	1.10395	0.142678	0.00122268	SDCCAG3	NM_006643	serologically defined colon cancer antigen 3	---	---	---	---
1563079_at	121.063	108.123	0.893115	-0.163082	0.00122948	LOC645022	BC022404	Hypothetical protein LOC645022	---	---	---	---
240669_at	184.438	149.704	0.81168	-0.301016	0.00123476	---	AW450171	Transcribed locus	---	---	---	---
208934_s_at	79.7831	65.6863	0.823311	-0.28049	0.00123565	LGALS8	AF342815	lectin, galactoside-binding, soluble, 8 (galectin 8)	---	5615 // extracellular space // traceable author statement	5529 // sugar binding // inferred from electronic annotation /// 5529 // sugar binding // traceable author statement	---
231796_at	222.015	191.665	0.863297	-0.212071	0.00123978	EPHA8	AL035703	EPH receptor A8	6468 // protein amino acid phosphorylation // inferred from electronic annotation /// 6468 // protein amino acid phosphorylation // traceable author statement /// 7169 // transmembrane receptor protein tyrosine kinase signaling pathway // inferred from electronic annotation	5886 // plasma membrane // traceable author statement /// 16020 // membrane // inferred from electronic annotation /// 16021 // integral to membrane // traceable author statement /// 16021 // integral to membrane // inferred from electronic annotation	166 // nucleotide binding // inferred from electronic annotation /// 4713 // protein-tyrosine kinase activity // inferred from electronic annotation /// 4872 // receptor activity // inferred from electronic annotation /// 5003 // ephrin receptor activity // inferred from electronic annotation /// 5524 // ATP binding // inferred from electronic annotation /// 16740 // transferase activity // infer…	---
206608_s_at	133.43	110.224	0.826083	-0.275641	0.00124782	RPGRIP1	NM_020366	retinitis pigmentosa GTPase regulator interacting protein 1	7601 // visual perception // inferred from electronic annotation /// 50896 // response to stimulus // inferred from electronic annotation	---	---	---
235953_at	59.929	49.0542	0.818539	-0.288877	0.00124799	ZNF610	AA776810	zinc finger protein 610	6355 // regulation of transcription, DNA-dependent // inferred from electronic annotation	5634 // nucleus // inferred from electronic annotation /// 5622 // intracellular // inferred from electronic annotation	3676 // nucleic acid binding // inferred from electronic annotation /// 8270 // zinc ion binding // inferred from electronic annotation	---
205063_at	78.2241	96.0657	1.22808	0.296408	0.001253	SIP1	NM_003616	survival of motor neuron protein interacting protein 1	245 // spliceosome assembly // traceable author statement /// 8380 // RNA splicing // traceable author statement /// 245 // spliceosome assembly // inferred from electronic annotation /// 398 // nuclear mRNA splicing, via spliceosome // inferred from electronic annotation /// 6397 // mRNA processing // inferred from electronic annotation /// 6397 // mRNA processing // traceable author statement	5681 // spliceosome complex // traceable author statement /// 5737 // cytoplasm // traceable author statement /// 5634 // nucleus // inferred from electronic annotation /// 5681 // spliceosome complex // inferred from electronic annotation /// 5634 // nucleus // traceable author statement	5515 // protein binding // inferred from physical interaction /// 31202 // RNA splicing factor activity, transesterification mechanism // traceable author statement	---
233371_at	52.2849	44.5197	0.851482	-0.231951	0.00125365	ABCC13	AP001660	ATP-binding cassette, sub-family C (CFTR/MRP), member 13	6810 // transport // inferred from electronic annotation	5634 // nucleus // non-traceable author statement /// 16020 // membrane // inferred from electronic annotation /// 16021 // integral to membrane // inferred from electronic annotation	5524 // ATP binding // inferred from electronic annotation /// 42626 // ATPase activity, coupled to transmembrane movement of substances // inferred from electronic annotation	---
1553562_at	64.1692	46.8742	0.730478	-0.453087	0.00126827	CD8B	NM_172100	CD8b molecule	6955 // immune response // non-traceable author statement /// 7169 // transmembrane receptor protein tyrosine kinase signaling pathway // non-traceable author statement /// 42110 // T cell activation // non-traceable author statement /// 6955 // immune response // inferred from electronic annotation	5886 // plasma membrane // traceable author statement /// 5887 // integral to plasma membrane // traceable author statement /// 42101 // T cell receptor complex // non-traceable author statement /// 16020 // membrane // inferred from electronic annotation /// 16021 // integral to membrane // inferred from electronic annotation	5515 // protein binding // inferred from physical interaction /// 15026 // coreceptor activity // non-traceable author statement /// 42288 // MHC class I protein binding // non-traceable author statement	---
220908_at	130.093	104.362	0.802215	-0.317939	0.00126892	CCDC33	NM_025055	coiled-coil domain containing 33	---	---	5515 // protein binding // inferred from physical interaction	---
1557569_at	86.6953	71.3918	0.823479	-0.280196	0.00127253	MPDU1	AA809846	mannose-P-dolichol utilization defect 1	---	16020 // membrane // inferred from electronic annotation /// 16021 // integral to membrane // inferred from electronic annotation	---	---
205848_at	247.304	186.413	0.753781	-0.407783	0.00127588	GAS2	NM_005256	growth arrest-specific 2	6915 // apoptosis // traceable author statement /// 7049 // cell cycle // inferred from electronic annotation /// 7050 // cell cycle arrest // inferred from electronic annotation /// 8360 // regulation of cell shape // inferred from electronic annotation /// 6915 // apoptosis // inferred from electronic annotation	5856 // cytoskeleton // inferred from electronic annotation /// 5884 // actin filament // traceable author statement	---	---
229014_at	153.75	123.445	0.802893	-0.316721	0.001282	FLJ42709	AW206234	hypothetical gene supported by AK124699	---	---	---	---
220424_at	118.413	103.696	0.875719	-0.19146	0.00128406	NPHS2	NM_014625	nephrosis 2, idiopathic, steroid-resistant (podocin)	7588 // excretion // traceable author statement	5887 // integral to plasma membrane // traceable author statement /// 16020 // membrane // inferred from electronic annotation /// 16021 // integral to membrane // inferred from electronic annotation	5515 // protein binding // inferred from physical interaction	---
220532_s_at	236.069	209.164	0.88603	-0.174573	0.00128593	LR8	NM_014020	LR8 protein	9887 // organ morphogenesis // traceable author statement	---	---	---
227778_at	106.3	94.7564	0.891409	-0.165841	0.00128882	KIAA1833 /// LOC642859	H11075	hypothetical protein KIAA1833 /// similar to CG12132-PA	---	---	5488 // binding // inferred from electronic annotation	---
1553895_at	146.507	122.577	0.836662	-0.257282	0.00128991	C11orf42	NM_173525	chromosome 11 open reading frame 42	---	---	---	---
1564760_at	75.0902	61.483	0.818788	-0.288438	0.00129023	---	BC018684	CDNA clone IMAGE:4694535	---	---	---	---
225284_at	144.657	173.123	1.19678	0.259163	0.00129283	LOC144871	AA639752	hypothetical protein LOC144871	---	---	---	---
1561571_at	293.213	249.179	0.849822	-0.234767	0.00130571	---	BC028116	CDNA clone IMAGE:4447481	---	---	---	---
1555913_at	191.015	156.946	0.821645	-0.283414	0.00131713	GON4L	AK098734	gon-4-like (C.elegans)	6355 // regulation of transcription, DNA-dependent // inferred from electronic annotation /// 45449 // regulation of transcription // inferred from electronic annotation	5634 // nucleus // inferred from electronic annotation	3677 // DNA binding // inferred from electronic annotation	---
227919_at	74.9576	61.7513	0.823817	-0.279604	0.00131758	UCA1	AA702248	UCA1 protein	---	---	---	---
240452_at	65.3853	54.9581	0.840527	-0.250635	0.00132163	GSPT1	AA580082	G1 to S phase transition 1	82 // G1/S transition of mitotic cell cycle // traceable author statement /// 184 // mRNA catabolism, nonsense-mediated decay // traceable author statement /// 6412 // protein biosynthesis // inferred from electronic annotation /// 82 // G1/S transition of mitotic cell cycle // inferred from sequence or structural similarity /// 184 // mRNA catabolism, nonsense-mediated decay // inferred from seq…	5622 // intracellular // non-traceable author statement /// 5622 // intracellular // inferred from sequence or structural similarity	166 // nucleotide binding // inferred from electronic annotation /// 3747 // translation release factor activity // inferred from mutant phenotype /// 3924 // GTPase activity // traceable author statement /// 5515 // protein binding // inferred from physical interaction /// 5525 // GTP binding // inferred from electronic annotation /// 3747 // translation release factor activity // inferred from …	---
204447_at	392.846	318.807	0.811532	-0.30128	0.00132205	ProSAPiP1	NM_014731	ProSAPiP1 protein	---	5737 // cytoplasm // inferred from electronic annotation /// 16020 // membrane // inferred from electronic annotation	---	---
1552887_at	79.3497	65.6743	0.827657	-0.272895	0.00133388	C10orf27	NM_152710	chromosome 10 open reading frame 27	6118 // electron transport // inferred from electronic annotation	---	20037 // heme binding // inferred from electronic annotation	---
1562323_at	77.7591	67.2873	0.865331	-0.208677	0.00135193	---	AL832093	MRNA; cDNA DKFZp313M0331 (from clone DKFZp313M0331)	---	---	---	---
215727_x_at	202.994	167.976	0.82749	-0.273185	0.00135327	CHD3	AF064839	Chromodomain helicase DNA binding protein 3	6333 // chromatin assembly or disassembly // inferred from electronic annotation /// 6350 // transcription // inferred from electronic annotation /// 6355 // regulation of transcription, DNA-dependent // inferred from electronic annotation /// 6357 // regulation of transcription from RNA polymerase II promoter // traceable author statement /// 7001 // chromosome organization and biogenesis (sensu…	785 // chromatin // inferred from electronic annotation /// 5634 // nucleus // inferred from electronic annotation	166 // nucleotide binding // inferred from electronic annotation /// 3677 // DNA binding // inferred from electronic annotation /// 3677 // DNA binding // traceable author statement /// 3682 // chromatin binding // inferred from electronic annotation /// 4003 // ATP-dependent DNA helicase activity // traceable author statement /// 5515 // protein binding // inferred from electronic annotation ///…	---
207404_s_at	72.4378	59.5682	0.822336	-0.282199	0.00135396	HTR1E	NM_000865	5-hydroxytryptamine (serotonin) receptor 1E	7165 // signal transduction // inferred from electronic annotation /// 7187 // G-protein signaling, coupled to cyclic nucleotide second messenger // traceable author statement /// 7268 // synaptic transmission // traceable author statement /// 7186 // G-protein coupled receptor protein signaling pathway // inferred from electronic annotation /// 7186 // G-protein coupled receptor protein signalin…	5887 // integral to plasma membrane // traceable author statement /// 16020 // membrane // inferred from electronic annotation /// 16021 // integral to membrane // inferred from electronic annotation	1584 // rhodopsin-like receptor activity // inferred from electronic annotation /// 4872 // receptor activity // inferred from electronic annotation /// 4993 // serotonin receptor activity // traceable author statement /// 4871 // signal transducer activity // inferred from electronic annotation /// 4930 // G-protein coupled receptor activity // inferred from electronic annotation /// 4930 // G-p…	GPCRDB_Class_A_Rhodopsin-like // GenMAPP /// Monoamine_GPCRs // GenMAPP
234704_at	70.2942	60.0379	0.854094	-0.227533	0.00136447	---	AF279782	---	---	---	---	---
228205_at	112.809	98.2282	0.87075	-0.19967	0.00136597	TKT	AU152969	transketolase (Wernicke-Korsakoff syndrome)	---	---	4802 // transketolase activity // traceable author statement /// 5509 // calcium ion binding // inferred from electronic annotation /// 16740 // transferase activity // inferred from electronic annotation /// 4802 // transketolase activity // inferred from electronic annotation /// 46872 // metal ion binding // inferred from electronic annotation	Pentose_Phosphate_Pathway // GenMAPP /// Pentose phosphate pathway // KEGG /// Carbon fixation // KEGG /// Biosynthesis of ansamycins // KEGG
223415_at	172.305	139.802	0.811366	-0.301576	0.00137056	RPP25	BC002497	ribonuclease P 25kDa subunit	---	---	5515 // protein binding // inferred from physical interaction /// 3676 // nucleic acid binding // inferred from electronic annotation	---
220944_at	166.906	143.747	0.86125	-0.215497	0.0013731	PGLYRP4	NM_020393	peptidoglycan recognition protein 4	9253 // peptidoglycan catabolism // inferred from electronic annotation /// 16045 // detection of bacteria // inferred from direct assay /// 45087 // innate immune response // non-traceable author statement /// 50830 // defense response to Gram-positive bacteria // inferred from direct assay /// 6955 // immune response // inferred from electronic annotation	5622 // intracellular // non-traceable author statement /// 16020 // membrane // non-traceable author statement	5515 // protein binding // inferred from electronic annotation /// 8745 // N-acetylmuramoyl-L-alanine amidase activity // inferred from electronic annotation /// 16019 // peptidoglycan receptor activity // inferred from direct assay /// 42834 // peptidoglycan binding // inferred from direct assay	---
227507_at	542.126	432.944	0.798603	-0.324449	0.00137335	---	BF593899	CDNA FLJ33188 fis, clone ADRGL2004749	---	---	---	---
219851_at	69.5903	61.6707	0.886196	-0.174302	0.00138358	ZNF613	NM_024840	zinc finger protein 613	6355 // regulation of transcription, DNA-dependent // inferred from electronic annotation	5634 // nucleus // inferred from electronic annotation /// 5622 // intracellular // inferred from electronic annotation	3676 // nucleic acid binding // inferred from electronic annotation /// 8270 // zinc ion binding // inferred from electronic annotation	---
207790_at	56.9062	48.7533	0.856731	-0.223086	0.00138391	LRRC1	NM_025168	leucine rich repeat containing 1	---	16020 // membrane // inferred from electronic annotation	---	---
237417_at	50.0987	41.9882	0.838111	-0.254788	0.00139107	RCBTB1	H49383	Regulator of chromosome condensation (RCC1) and BTB (POZ) domain containing protein 1	6350 // transcription // inferred from electronic annotation /// 6355 // regulation of transcription, DNA-dependent // inferred from electronic annotation /// 7049 // cell cycle // inferred from electronic annotation /// 16568 // chromatin modification // inferred from electronic annotation	5634 // nucleus // inferred from electronic annotation	5515 // protein binding // inferred from electronic annotation	---
244644_at	76.4063	66.3509	0.868395	-0.203576	0.00139507	FAM9C	AI650599	family with sequence similarity 9, member C	---	5634 // nucleus // inferred from electronic annotation	---	---
242929_at	80.1812	64.1594	0.80018	-0.321603	0.00139771	RHOH	AW275093	Ras homolog gene family, member H	7264 // small GTPase mediated signal transduction // inferred from electronic annotation /// 30217 // T cell differentiation // non-traceable author statement /// 43124 // negative regulation of I-kappaB kinase/NF-kappaB cascade // inferred from direct assay /// 45449 // regulation of transcription // non-traceable author statement	5737 // cytoplasm // inferred from direct assay /// 16020 // membrane // inferred from electronic annotation /// 5622 // intracellular // inferred from electronic annotation	166 // nucleotide binding // inferred from electronic annotation /// 5095 // GTPase inhibitor activity // non-traceable author statement /// 5525 // GTP binding // inferred from direct assay /// 17048 // Rho GTPase binding // non-traceable author statement /// 19210 // kinase inhibitor activity // inferred from direct assay /// 5525 // GTP binding // inferred from electronic annotation	---
224239_at	74.7764	62.9477	0.841811	-0.248431	0.00141665	DEFB103A	AF301470	defensin, beta 103A	6965 // anti-Gram-positive bacterial polypeptide induction // traceable author statement /// 9613 // response to pest, pathogen or parasite // inferred from electronic annotation /// 42742 // defense response to bacteria // inferred from electronic annotation /// 6952 // defense response // inferred from electronic annotation	5576 // extracellular region // non-traceable author statement /// 5576 // extracellular region // inferred from electronic annotation	---	---
1557062_at	117.72	91.4733	0.777044	-0.363932	0.00142196	ZNF435	BC043177	Zinc finger protein 435	6350 // transcription // inferred from electronic annotation /// 6355 // regulation of transcription, DNA-dependent // inferred from electronic annotation	5634 // nucleus // inferred from electronic annotation	3700 // transcription factor activity // inferred from electronic annotation /// 8270 // zinc ion binding // inferred from electronic annotation /// 46872 // metal ion binding // inferred from electronic annotation /// 3676 // nucleic acid binding // inferred from electronic annotation /// 3677 // DNA binding // inferred from electronic annotation	---
236667_at	435.071	339.775	0.780965	-0.35667	0.00142288	RHOF	BE218186	Ras homolog gene family, member F (in filopodia)	7015 // actin filament organization // inferred from direct assay /// 7264 // small GTPase mediated signal transduction // inferred from electronic annotation	5856 // cytoskeleton // non-traceable author statement /// 16020 // membrane // inferred from electronic annotation	166 // nucleotide binding // inferred from electronic annotation /// 3924 // GTPase activity // non-traceable author statement /// 5525 // GTP binding // inferred from electronic annotation	---
237834_at	63.4751	50.1779	0.790513	-0.339139	0.00142848	SNCAIP	BF062366	synuclein, alpha interacting protein (synphilin)	42417 // dopamine metabolism // inferred from direct assay /// 46928 // regulation of neurotransmitter secretion // inferred from direct assay	5737 // cytoplasm // inferred from direct assay /// 42734 // presynaptic membrane // non-traceable author statement /// 43025 // cell soma // non-traceable author statement /// 5737 // cytoplasm // traceable author statement	5515 // protein binding // inferred from physical interaction /// 5515 // protein binding // inferred from direct assay /// 5515 // protein binding // traceable author statement	---
244012_x_at	186.495	156.572	0.839548	-0.252316	0.00143877	---	AI761130	---	---	---	---	---
219869_s_at	99.4597	79.1554	0.795855	-0.329423	0.0014422	SLC39A8	NM_022154	solute carrier family 39 (zinc transporter), member 8	30001 // metal ion transport // inferred from electronic annotation	16020 // membrane // inferred from electronic annotation	46873 // metal ion transporter activity // inferred from electronic annotation	---
243223_at	86.522	69.9422	0.808375	-0.306903	0.0014564	---	AA453526	Transcribed locus	---	---	---	---
1564413_at	169.603	149.671	0.882478	-0.180367	0.00146504	FLJ36116	AK093435	hypothetical locus LOC388666	---	---	---	---
230422_at	53.1274	44.0348	0.828852	-0.270814	0.00148238	FPRL2	AW026543	formyl peptide receptor-like 2	6928 // cell motility // traceable author statement /// 6935 // chemotaxis // inferred from electronic annotation /// 7165 // signal transduction // traceable author statement /// 7186 // G-protein coupled receptor protein signaling pathway // inferred from electronic annotation /// 50896 // response to stimulus // inferred from electronic annotation /// 7165 // signal transduction // inferred fr…	5886 // plasma membrane // traceable author statement /// 16021 // integral to membrane // traceable author statement /// 16020 // membrane // inferred from electronic annotation /// 16021 // integral to membrane // inferred from electronic annotation	1584 // rhodopsin-like receptor activity // inferred from electronic annotation /// 4872 // receptor activity // inferred from electronic annotation /// 4982 // N-formyl peptide receptor activity // traceable author statement /// 4871 // signal transducer activity // inferred from electronic annotation /// 4930 // G-protein coupled receptor activity // inferred from electronic annotation /// 4982…	GPCRDB_Class_A_Rhodopsin-like // GenMAPP /// Peptide_GPCRs // GenMAPP
241385_at	166.633	142.344	0.854238	-0.22729	0.00149968	HDCMA18P	AW082329	HDCMA18P protein	6396 // RNA processing // inferred from electronic annotation /// 6405 // RNA export from nucleus // inferred from electronic annotation	5634 // nucleus // inferred from electronic annotation /// 5737 // cytoplasm // inferred from electronic annotation /// 30529 // ribonucleoprotein complex // inferred from electronic annotation	166 // nucleotide binding // inferred from electronic annotation /// 3676 // nucleic acid binding // inferred from electronic annotation /// 3723 // RNA binding // inferred from electronic annotation	---
243741_at	97.883	80.049	0.817803	-0.290175	0.00150742	TRPM1	AW665484	Transient receptor potential cation channel, subfamily M, member 1	6812 // cation transport // inferred from electronic annotation /// 6810 // transport // inferred from electronic annotation /// 6811 // ion transport // inferred from electronic annotation /// 6810 // transport // traceable author statement	5624 // membrane fraction // not recorded /// 5887 // integral to plasma membrane // traceable author statement /// 16020 // membrane // inferred from electronic annotation /// 16021 // integral to membrane // inferred from electronic annotation	5262 // calcium channel activity // traceable author statement /// 5216 // ion channel activity // inferred from electronic annotation /// 5261 // cation channel activity // inferred from electronic annotation	---
203368_at	173.17	154.832	0.894102	-0.161489	0.00150817	CRELD1	NM_015513	cysteine-rich with EGF-like domains 1	---	16020 // membrane // inferred from electronic annotation /// 16021 // integral to membrane // inferred from electronic annotation	5198 // structural molecule activity // inferred from electronic annotation /// 5509 // calcium ion binding // inferred from electronic annotation	---
213649_at	88.198	76.2912	0.864999	-0.209229	0.0015085	SFRS7	AA524053	splicing factor, arginine/serine-rich 7, 35kDa	398 // nuclear mRNA splicing, via spliceosome // inferred from electronic annotation /// 8380 // RNA splicing // inferred from direct assay /// 6397 // mRNA processing // inferred from electronic annotation /// 6397 // mRNA processing // traceable author statement	5634 // nucleus // traceable author statement /// 5634 // nucleus // inferred from electronic annotation	166 // nucleotide binding // inferred from electronic annotation /// 3723 // RNA binding // inferred from electronic annotation /// 5515 // protein binding // inferred from physical interaction /// 8270 // zinc ion binding // inferred from electronic annotation /// 46872 // metal ion binding // inferred from electronic annotation /// 3676 // nucleic acid binding // inferred from electronic annota…	mRNA_processing_Reactome // GenMAPP /// mRNA_processing_Reactome // GenMAPP /// mRNA_processing_Reactome // GenMAPP
233958_at	54.3136	46.7146	0.86009	-0.21744	0.00152107	---	AF143330	Clone IMAGE:112577 mRNA sequence	---	---	---	---
218950_at	115.56	102.206	0.884435	-0.177173	0.00153092	CENTD3	NM_022481	centaurin, delta 3	7010 // cytoskeleton organization and biogenesis // traceable author statement /// 7165 // signal transduction // inferred from electronic annotation /// 8360 // regulation of cell shape // inferred from sequence or structural similarity /// 16192 // vesicle-mediated transport // traceable author statement /// 30336 // negative regulation of cell migration // inferred from sequence or structural …	1726 // ruffle // inferred from sequence or structural similarity /// 5737 // cytoplasm // Unknown /// 5737 // cytoplasm // inferred from sequence or structural similarity /// 30027 // lamellipodium // inferred from sequence or structural similarity	5100 // Rho GTPase activator activity // inferred from sequence or structural similarity /// 5547 // phosphatidylinositol-3,4,5-triphosphate binding // inferred from direct assay /// 8060 // ARF GTPase activator activity // inferred from sequence or structural similarity /// 8270 // zinc ion binding // inferred from electronic annotation /// 30675 // Rac GTPase activator activity // inferred from…	---
214837_at	93.369	77.952	0.834881	-0.260358	0.00153941	ALB	M12523	albumin	6810 // transport // inferred from electronic annotation /// 6810 // transport // traceable author statement /// 9267 // cellular response to starvation // inferred from direct assay /// 19836 // hemolysis of host red blood cells // inferred from direct assay /// 30104 // water homeostasis // non-traceable author statement /// 43066 // negative regulation of apoptosis // inferred from direct assa…	5615 // extracellular space // inferred from electronic annotation /// 43234 // protein complex // inferred from direct assay /// 5576 // extracellular region // non-traceable author statement	3677 // DNA binding // inferred from direct assay /// 5386 // carrier activity // inferred from electronic annotation /// 5504 // fatty acid binding // inferred from direct assay /// 5504 // fatty acid binding // non-traceable author statement /// 5507 // copper ion binding // non-traceable author statement /// 5515 // protein binding // inferred from physical interaction /// 8144 // drug binding…	---
206035_at	62.5321	48.1037	0.769263	-0.37845	0.00154726	REL	NM_002908	v-rel reticuloendotheliosis viral oncogene homolog (avian)	6355 // regulation of transcription, DNA-dependent // inferred from electronic annotation /// 6366 // transcription from RNA polymerase II promoter // not recorded /// 43123 // positive regulation of I-kappaB kinase/NF-kappaB cascade // inferred from expression pattern /// 6350 // transcription // inferred from electronic annotation /// 45449 // regulation of transcription // inferred from electr…	5634 // nucleus // inferred from electronic annotation	3700 // transcription factor activity // non-traceable author statement /// 4871 // signal transducer activity // inferred from expression pattern /// 3677 // DNA binding // inferred from electronic annotation /// 3700 // transcription factor activity // inferred from electronic annotation	---
221670_s_at	177.641	156.706	0.882153	-0.180899	0.00154744	LHX3	AF156888	LIM homeobox 3	6355 // regulation of transcription, DNA-dependent // inferred from electronic annotation /// 9887 // organ morphogenesis // traceable author statement /// 6350 // transcription // inferred from electronic annotation /// 45449 // regulation of transcription // inferred from electronic annotation	5634 // nucleus // traceable author statement /// 5634 // nucleus // inferred from electronic annotation	3700 // transcription factor activity // inferred from electronic annotation /// 3702 // RNA polymerase II transcription factor activity // traceable author statement /// 8270 // zinc ion binding // inferred from electronic annotation /// 43565 // sequence-specific DNA binding // inferred from electronic annotation /// 46872 // metal ion binding // inferred from electronic annotation /// 3677 // …	---
212490_at	84.9494	96.9901	1.14174	0.191233	0.00156797	DNAJC8	AA843895	DnaJ (Hsp40) homolog, subfamily C, member 8	6457 // protein folding // inferred from electronic annotation /// 7186 // G-protein coupled receptor protein signaling pathway // inferred from mutant phenotype /// 48015 // phosphoinositide-mediated signaling // inferred from direct assay /// 6935 // chemotaxis // inferred from electronic annotation /// 7165 // signal transduction // inferred from electronic annotation /// 7186 // G-protein cou…	16020 // membrane // inferred from direct assay /// 16020 // membrane // inferred from electronic annotation /// 16021 // integral to membrane // inferred from electronic annotation /// 5887 // integral to plasma membrane // traceable author statement /// 16021 // integral to membrane // non-traceable author statement	31072 // heat shock protein binding // inferred from electronic annotation /// 51082 // unfolded protein binding // inferred from electronic annotation /// 4992 // platelet activating factor receptor activity // inferred from direct assay /// 5543 // phospholipid binding // inferred from direct assay /// 1584 // rhodopsin-like receptor activity // inferred from electronic annotation /// 4871 // s…	mRNA_processing_Reactome // GenMAPP /// mRNA_processing_Reactome // GenMAPP /// GPCRDB_Class_A_Rhodopsin-like // GenMAPP /// GPCRDB_Class_A_Rhodopsin-like // GenMAPP /// Small_ligand_GPCRs // GenMAPP /// Small_ligand_GPCRs // GenMAPP
1566340_at	79.8692	62.7024	0.785064	-0.349118	0.00157141	SNORD8	BG944179	small nucleolar RNA, C/D box 8	---	---	---	---
230254_at	251.74	191.959	0.762531	-0.391132	0.00157905	---	AA102600	---	---	---	---	---
200049_at	673.92	550.076	0.816234	-0.292946	0.00158384	MYST2	NM_007067	MYST histone acetyltransferase 2 /// MYST histone acetyltransferase 2	6260 // DNA replication // traceable author statement /// 6350 // transcription // inferred from electronic annotation /// 6355 // regulation of transcription, DNA-dependent // traceable author statement /// 16568 // chromatin modification // inferred from electronic annotation /// 6260 // DNA replication // inferred from electronic annotation /// 6355 // regulation of transcription, DNA-dependen…	5634 // nucleus // traceable author statement /// 5634 // nucleus // inferred from electronic annotation	3700 // transcription factor activity // inferred from electronic annotation /// 4406 // H3/H4 histone acetyltransferase activity // traceable author statement /// 5515 // protein binding // inferred from physical interaction /// 8270 // zinc ion binding // inferred from electronic annotation /// 8415 // acyltransferase activity // inferred from electronic annotation /// 16740 // transferase acti…	Neurodegenerative Disorders // KEGG /// Wnt signaling pathway // KEGG /// Notch signaling pathway // KEGG /// TGF-beta signaling pathway // KEGG /// Adherens junction // KEGG /// Jak-STAT signaling pathway // KEGG /// Long-term potentiation // KEGG /// Huntington's disease // KEGG
36612_at	124.371	142.329	1.14438	0.194572	0.00158745	KIAA0280	D87470	KIAA0280	---	---	---	---
216453_at	224.867	159.859	0.710906	-0.492269	0.00158901	ZNF287	AL359578	zinc finger protein 287	6350 // transcription // inferred from electronic annotation /// 6355 // regulation of transcription, DNA-dependent // inferred from electronic annotation	5634 // nucleus // inferred from electronic annotation /// 5622 // intracellular // inferred from electronic annotation	3700 // transcription factor activity // inferred from electronic annotation /// 8270 // zinc ion binding // inferred from electronic annotation /// 46872 // metal ion binding // inferred from electronic annotation /// 3676 // nucleic acid binding // inferred from electronic annotation /// 3677 // DNA binding // inferred from electronic annotation	---
219197_s_at	337.343	275.733	0.817367	-0.290943	0.00158997	SCUBE2	AI424243	signal peptide, CUB domain, EGF-like 2	---	5882 // intermediate filament // inferred from electronic annotation	5509 // calcium ion binding // inferred from electronic annotation /// 5198 // structural molecule activity // inferred from electronic annotation	---
1555319_at	85.5839	76.4503	0.893279	-0.162816	0.00158999	STAB1	AB052957	stabilin 1	6898 // receptor mediated endocytosis // inferred from sequence or structural similarity /// 6898 // receptor mediated endocytosis // traceable author statement /// 6954 // inflammatory response // inferred from electronic annotation /// 7155 // cell adhesion // inferred from sequence or structural similarity /// 7155 // cell adhesion // non-traceable author statement /// 7267 // cell-cell signal…	5887 // integral to plasma membrane // inferred from direct assay /// 5887 // integral to plasma membrane // inferred from sequence or structural similarity /// 16020 // membrane // inferred from electronic annotation /// 16021 // integral to membrane // inferred from electronic annotation	4872 // receptor activity // inferred from electronic annotation /// 5041 // low-density lipoprotein receptor activity // inferred from direct assay /// 5041 // low-density lipoprotein receptor activity // inferred from sequence or structural similarity /// 5044 // scavenger receptor activity // inferred from direct assay /// 5044 // scavenger receptor activity // inferred from sequence or struct…	---
217335_at	53.1229	42.4147	0.798425	-0.32477	0.00159117	FLJ11292	AK023539	hypothetical protein FLJ11292	---	---	---	---
218552_at	546.114	478.156	0.875562	-0.191719	0.0015917	ECHDC2	NM_018281	enoyl Coenzyme A hydratase domain containing 2	8152 // metabolism // inferred from electronic annotation	---	3824 // catalytic activity // inferred from electronic annotation /// 3859 // 3-hydroxybutyryl-CoA dehydratase activity // inferred from electronic annotation	---
244250_at	72.9462	60.5552	0.830135	-0.268582	0.00159211	ANXA6	AI917653	annexin A6	---	---	3824 // catalytic activity // inferred from electronic annotation /// 5509 // calcium ion binding // inferred from electronic annotation /// 5515 // protein binding // inferred from physical interaction /// 5544 // calcium-dependent phospholipid binding // inferred from electronic annotation /// 5509 // calcium ion binding // not recorded /// 5543 // phospholipid binding // not recorded	Prostaglandin_synthesis_regulation // GenMAPP /// Calcium_regulation_in_cardiac_cells // GenMAPP
200699_at	216.71	269.925	1.24556	0.316789	0.0015953	KDELR2	BE962456	KDEL (Lys-Asp-Glu-Leu) endoplasmic reticulum protein retention receptor 2	6621 // protein retention in ER // inferred from electronic annotation /// 6886 // intracellular protein transport // traceable author statement /// 6888 // ER to Golgi vesicle-mediated transport // inferred from electronic annotation /// 15031 // protein transport // inferred from electronic annotation /// 6810 // transport // inferred from electronic annotation /// 6629 // lipid metabolism // i…	5783 // endoplasmic reticulum // inferred from electronic annotation /// 5783 // endoplasmic reticulum // traceable author statement /// 5794 // Golgi apparatus // traceable author statement /// 16020 // membrane // inferred from electronic annotation /// 16021 // integral to membrane // inferred from electronic annotation /// 16021 // integral to membrane // traceable author statement	4872 // receptor activity // inferred from electronic annotation /// 5046 // KDEL sequence binding // traceable author statement /// 46923 // ER retention sequence binding // inferred from electronic annotation /// 4806 // triacylglycerol lipase activity // inferred from electronic annotation	---
241870_at	63.664	54.4127	0.854685	-0.226535	0.00159801	PTCHD1	AW014631	Patched domain containing 1	---	16020 // membrane // inferred from electronic annotation	8158 // hedgehog receptor activity // inferred from electronic annotation	---
243238_at	140.832	116.03	0.82389	-0.279477	0.0016036	PYGB	AA601213	Phosphorylase, glycogen; brain	5975 // carbohydrate metabolism // inferred from electronic annotation /// 5980 // glycogen catabolism // traceable author statement /// 5977 // glycogen metabolism // inferred from electronic annotation	---	4645 // phosphorylase activity // inferred from electronic annotation /// 16757 // transferase activity, transferring glycosyl groups // inferred from electronic annotation /// 30170 // pyridoxal phosphate binding // inferred from electronic annotation /// 3824 // catalytic activity // inferred from electronic annotation /// 16740 // transferase activity // inferred from electronic annotation	Glycogen_Metabolism // GenMAPP /// Glycogen_Metabolism // GenMAPP /// Starch and sucrose metabolism // KEGG /// Insulin signaling pathway // KEGG
1561009_at	73.8623	59.4317	0.804628	-0.313607	0.00160812	MAOB	AF088019	Monoamine oxidase B	6118 // electron transport // inferred from electronic annotation	5740 // mitochondrial envelope // traceable author statement /// 16020 // membrane // inferred from electronic annotation /// 16021 // integral to membrane // inferred from electronic annotation /// 5739 // mitochondrion // inferred from electronic annotation	8131 // amine oxidase activity // inferred from electronic annotation /// 16491 // oxidoreductase activity // inferred from electronic annotation	Glycine, serine and threonine metabolism // KEGG /// Arginine and proline metabolism // KEGG /// Histidine metabolism // KEGG /// Tyrosine metabolism // KEGG /// Phenylalanine metabolism // KEGG /// Tryptophan metabolism // KEGG
223939_at	54.4994	48.124	0.883018	-0.179485	0.00161602	SUCNR1	AF348078	succinate receptor 1	7165 // signal transduction // inferred from electronic annotation /// 7186 // G-protein coupled receptor protein signaling pathway // inferred from electronic annotation	16020 // membrane // inferred from electronic annotation /// 16021 // integral to membrane // non-traceable author statement /// 16021 // integral to membrane // inferred from electronic annotation	1584 // rhodopsin-like receptor activity // inferred from electronic annotation /// 4872 // receptor activity // inferred from electronic annotation /// 16526 // G-protein coupled receptor activity, unknown ligand // non-traceable author statement /// 45028 // purinergic nucleotide receptor activity, G-protein coupled // inferred from electronic annotation /// 4871 // signal transducer activity /…	GPCRDB_Class_A_Rhodopsin-like // GenMAPP
209253_at	295.219	262.503	0.88918	-0.169452	0.00163962	SORBS3	AF037261	sorbin and SH3 domain containing 3	7155 // cell adhesion // traceable author statement /// 51496 // positive regulation of stress fiber formation // inferred from direct assay /// 7155 // cell adhesion // inferred from electronic annotation /// 51495 // positive regulation of cytoskeleton organization and biogenesis // non-traceable author statement	5856 // cytoskeleton // inferred from electronic annotation /// 5925 // focal adhesion // inferred from direct assay	5200 // structural constituent of cytoskeleton // traceable author statement /// 5515 // protein binding // inferred from electronic annotation /// 17166 // vinculin binding // inferred from physical interaction	---
223305_at	164.401	139.955	0.851301	-0.232259	0.00164526	MGC13379	AF151078	HSPC244	---	---	---	---
235668_at	110.314	98.3042	0.891135	-0.166285	0.00164606	PRDM1	AW977527	PR domain containing 1, with ZNF domain	122 // negative regulation of transcription from RNA polymerase II promoter // traceable author statement /// 6350 // transcription // inferred from electronic annotation /// 6355 // regulation of transcription, DNA-dependent // inferred from electronic annotation	5634 // nucleus // inferred from electronic annotation	3676 // nucleic acid binding // inferred from electronic annotation /// 3700 // transcription factor activity // traceable author statement /// 8270 // zinc ion binding // inferred from electronic annotation /// 46872 // metal ion binding // inferred from electronic annotation /// 3677 // DNA binding // inferred from electronic annotation	---
235692_at	277.459	219.027	0.789404	-0.341164	0.00165041	---	AW024527	CDNA clone IMAGE:5432927	---	---	---	---
220188_at	56.0653	46.4104	0.827792	-0.272659	0.00165097	JPH3	NM_020655	junctophilin 3	---	5783 // endoplasmic reticulum // inferred from electronic annotation /// 16020 // membrane // inferred from electronic annotation /// 16021 // integral to membrane // non-traceable author statement /// 16021 // integral to membrane // inferred from electronic annotation	---	---
235651_at	57.9474	45.3758	0.783051	-0.352823	0.00165814	---	AV741130	---	---	---	---	---
225592_at	213.927	173.855	0.812686	-0.29923	0.00166548	NRM	D81048	nurim (nuclear envelope membrane protein)	---	5635 // nuclear envelope // traceable author statement	---	---
241841_at	87.2329	78.1728	0.896139	-0.158206	0.00167407	CPT1B	AI298755	Carnitine palmitoyltransferase 1B (muscle)	6629 // lipid metabolism // inferred from electronic annotation /// 6631 // fatty acid metabolism // inferred from electronic annotation /// 6635 // fatty acid beta-oxidation // traceable author statement /// 6810 // transport // inferred from electronic annotation	5739 // mitochondrion // traceable author statement /// 16021 // integral to membrane // inferred from electronic annotation /// 19867 // outer membrane // inferred from electronic annotation /// 5739 // mitochondrion // inferred from electronic annotation /// 16020 // membrane // inferred from electronic annotation	4095 // carnitine O-palmitoyltransferase activity // traceable author statement /// 8415 // acyltransferase activity // inferred from electronic annotation /// 16740 // transferase activity // inferred from electronic annotation /// 4095 // carnitine O-palmitoyltransferase activity // inferred from electronic annotation /// 4305 // ethanolamine kinase activity // inferred from electronic annotati…	Fatty_Acid_Degradation // GenMAPP /// Fatty_Acid_Degradation // GenMAPP /// Fatty acid metabolism // KEGG /// Adipocytokine signaling pathway // KEGG
1560524_at	58.6079	50.1214	0.8552	-0.225667	0.0016753	LOC400581	BC026233	GRB2-related adaptor protein-like	7242 // intracellular signaling cascade // inferred from electronic annotation	---	---	---
1557542_at	83.8323	70.7374	0.843797	-0.245033	0.00167945	---	AW069144	CDNA FLJ37494 fis, clone BRAWH2015385	---	---	---	---
211707_s_at	164.096	132.912	0.809965	-0.304068	0.00168088	IQCB1	BC005806	IQ motif containing B1 /// IQ motif containing B1	---	---	5488 // binding // inferred from electronic annotation	---
226998_at	180.397	199.415	1.10543	0.144605	0.00168551	NARG1	AL556909	NMDA receptor regulated 1	1525 // angiogenesis // inferred from electronic annotation /// 6350 // transcription // inferred from electronic annotation /// 6474 // N-terminal protein amino acid acetylation // inferred from direct assay /// 30154 // cell differentiation // inferred from electronic annotation /// 45893 // positive regulation of transcription, DNA-dependent // inferred from direct assay /// 6355 // regulation…	5634 // nucleus // inferred from direct assay /// 5667 // transcription factor complex // inferred from direct assay /// 5737 // cytoplasm // inferred from direct assay /// 5634 // nucleus // inferred from electronic annotation	5515 // protein binding // inferred from physical interaction /// 16407 // acetyltransferase activity // inferred from direct assay /// 43022 // ribosome binding // inferred from direct assay /// 3700 // transcription factor activity // inferred from electronic annotation /// 4872 // receptor activity // inferred from electronic annotation /// 5488 // binding // inferred from electronic annotation	Electron_Transport_Chain // GenMAPP
230442_at	142.572	121.979	0.855559	-0.225061	0.00169223	MTHFSD	AI700675	methenyltetrahydrofolate synthetase domain containing	8152 // metabolism // inferred from electronic annotation	---	166 // nucleotide binding // inferred from electronic annotation /// 3676 // nucleic acid binding // inferred from electronic annotation /// 3824 // catalytic activity // inferred from electronic annotation	---
223017_at	481.453	391.341	0.812832	-0.298971	0.00170933	TXNDC12	AF131758	thioredoxin domain containing 12 (endoplasmic reticulum)	6118 // electron transport // inferred from electronic annotation	5783 // endoplasmic reticulum // inferred from electronic annotation	---	---
1557406_s_at	206.927	157.147	0.759432	-0.397008	0.00171202	LOC283697	AW450358	hypothetical protein LOC283697	---	---	---	---
1553238_a_at	330.902	282.438	0.853538	-0.228472	0.0017168	HIPK4	NM_144685	homeodomain interacting protein kinase 4	6468 // protein amino acid phosphorylation // inferred from electronic annotation	5634 // nucleus // inferred from electronic annotation	166 // nucleotide binding // inferred from electronic annotation /// 4674 // protein serine/threonine kinase activity // inferred from electronic annotation /// 5524 // ATP binding // inferred from electronic annotation /// 16740 // transferase activity // inferred from electronic annotation /// 4672 // protein kinase activity // inferred from electronic annotation /// 16301 // kinase activity //…	---
244485_at	105.234	85.7318	0.814679	-0.295696	0.00171988	HLA-DPB1	AW402154	Major histocompatibility complex, class II, DP beta 1	6955 // immune response // inferred from electronic annotation /// 9405 // pathogenesis // traceable author statement /// 9596 // detection of pest, pathogen or parasite // traceable author statement /// 19884 // antigen presentation, exogenous antigen // inferred from electronic annotation /// 19886 // antigen processing, exogenous antigen via MHC class II // inferred from electronic annotation	16020 // membrane // inferred from electronic annotation /// 16021 // integral to membrane // inferred from electronic annotation	45012 // MHC class II receptor activity // inferred from electronic annotation /// 45012 // MHC class II receptor activity // traceable author statement	---
1564449_at	281.226	226.784	0.806412	-0.31041	0.00172183	THY1	AK097820	Thy-1 cell surface antigen	1525 // angiogenesis // inferred from sequence or structural similarity /// 6469 // negative regulation of protein kinase activity // inferred from sequence or structural similarity /// 7010 // cytoskeleton organization and biogenesis // inferred from sequence or structural similarity /// 16337 // cell-cell adhesion // inferred from sequence or structural similarity /// 30336 // negative regulati…	5829 // cytosol // inferred from sequence or structural similarity /// 5887 // integral to plasma membrane // traceable author statement /// 9897 // external side of plasma membrane // inferred from sequence or structural similarity /// 30426 // growth cone // inferred from sequence or structural similarity /// 45121 // lipid raft // non-traceable author statement /// 5886 // plasma membrane // i…	5100 // Rho GTPase activator activity // inferred from sequence or structural similarity /// 5178 // integrin binding // inferred from physical interaction /// 5515 // protein binding // inferred from physical interaction /// 48503 // GPI anchor binding // inferred from sequence or structural similarity	---
219749_at	207.227	170.793	0.824183	-0.278963	0.00172273	SH2D4A	NM_022071	SH2 domain containing 4A	7242 // intracellular signaling cascade // inferred from electronic annotation	---	---	---
229910_at	192.37	167.719	0.871855	-0.197841	0.00173721	SHE	AI797276	Src homology 2 domain containing E	7242 // intracellular signaling cascade // inferred from electronic annotation	---	---	---
224088_at	162.782	126.381	0.776383	-0.365159	0.00174095	NMUR2	AF272363	neuromedin U receptor 2	6816 // calcium ion transport // inferred from direct assay /// 6940 // regulation of smooth muscle contraction // non-traceable author statement /// 7165 // signal transduction // inferred from electronic annotation /// 7200 // G-protein signaling, coupled to IP3 second messenger (phospholipase C activating) // inferred from direct assay /// 7204 // elevation of cytosolic calcium ion concentrati…	16020 // membrane // inferred from electronic annotation /// 16021 // integral to membrane // inferred from direct assay /// 16021 // integral to membrane // inferred from electronic annotation	1584 // rhodopsin-like receptor activity // inferred from electronic annotation /// 1607 // neuromedin U receptor activity // inferred from direct assay /// 4872 // receptor activity // inferred from electronic annotation /// 5229 // intracellular calcium activated chloride channel activity // inferred from direct assay /// 5525 // GTP binding // inferred from direct assay /// 42924 // neuromedin…	GPCRDB_Class_A_Rhodopsin-like // GenMAPP
206862_at	77.3729	59.8893	0.774035	-0.369529	0.00174129	ZNF254 /// ZNF539	NM_004876	zinc finger protein 254 /// zinc finger protein 539	122 // negative regulation of transcription from RNA polymerase II promoter // traceable author statement /// 6350 // transcription // inferred from electronic annotation /// 6355 // regulation of transcription, DNA-dependent // inferred from electronic annotation	5634 // nucleus // inferred from electronic annotation /// 5622 // intracellular // inferred from electronic annotation	3677 // DNA binding // inferred from electronic annotation /// 8270 // zinc ion binding // inferred from electronic annotation /// 46872 // metal ion binding // inferred from electronic annotation /// 3676 // nucleic acid binding // inferred from electronic annotation	---
244133_at	115.593	104.803	0.906657	-0.141371	0.001742	---	BE258909	Transcribed locus, strongly similar to NP_061031.2 ubiquitin specific protease 49 [Homo sapiens]	---	---	---	---
235372_at	113.636	94.269	0.829567	-0.26957	0.0017484	FCRLM1	AW575245	Fc receptor-like and mucin-like 1	---	---	4872 // receptor activity // inferred from electronic annotation	---
205238_at	80.1382	70.101	0.874751	-0.193055	0.00175068	CXorf34	NM_024917	chromosome X open reading frame 34	---	---	8757 // S-adenosylmethionine-dependent methyltransferase activity // inferred from electronic annotation /// 16740 // transferase activity // inferred from electronic annotation /// 8168 // methyltransferase activity // inferred from electronic annotation	---
208216_at	76.5396	66.8172	0.872976	-0.195986	0.00175258	DLX4	NM_001934	distal-less homeobox 4	6355 // regulation of transcription, DNA-dependent // inferred from electronic annotation /// 7275 // development // inferred from electronic annotation /// 45449 // regulation of transcription // inferred from electronic annotation	5634 // nucleus // inferred from electronic annotation	3700 // transcription factor activity // traceable author statement /// 43565 // sequence-specific DNA binding // inferred from electronic annotation /// 3677 // DNA binding // inferred from electronic annotation /// 3700 // transcription factor activity // inferred from electronic annotation	---
201362_at	136.45	176.373	1.29258	0.370254	0.00175335	IVNS1ABP	AF205218	influenza virus NS1A binding protein	6383 // transcription from RNA polymerase III promoter // traceable author statement /// 8380 // RNA splicing // traceable author statement /// 9615 // response to virus // traceable author statement	5667 // transcription factor complex // traceable author statement /// 5681 // spliceosome complex // traceable author statement	5515 // protein binding // inferred from electronic annotation	---
242264_at	122.954	110.018	0.894792	-0.160376	0.00175773	---	AI973099	---	---	---	---	---
205436_s_at	115.36	135.593	1.17539	0.233135	0.00176218	H2AFX	NM_002105	H2A histone family, member X	6281 // DNA repair // inferred from electronic annotation /// 6310 // DNA recombination // inferred from electronic annotation /// 6334 // nucleosome assembly // non-traceable author statement /// 7001 // chromosome organization and biogenesis (sensu Eukaryota) // non-traceable author statement /// 7049 // cell cycle // inferred from electronic annotation /// 7126 // meiosis // inferred from elec…	786 // nucleosome // non-traceable author statement /// 5634 // nucleus // inferred from direct assay /// 5694 // chromosome // inferred from electronic annotation /// 786 // nucleosome // inferred from electronic annotation /// 5634 // nucleus // inferred from electronic annotation	3677 // DNA binding // non-traceable author statement /// 5515 // protein binding // inferred from physical interaction /// 3677 // DNA binding // inferred from electronic annotation	Proteasome_Degradation // GenMAPP
223796_at	89.7591	73.9429	0.823793	-0.279647	0.00176227	CNTNAP3 /// CNTNAP3B /// LOC642342 /// LOC642373 /// FLJ37512	AF333769	contactin associated protein-like 3 /// contactin associated protein-like 3B /// similar to Contactin-associated protein-like 3 precursor (Cell recognition molecule Caspr3) /// similar to Contactin-associated protein-like 3 precursor (Cell recognition molecule Caspr3) /// similar to Contactin-associated protein-like 3 precursor (Cell recognition molecule Caspr3)	7155 // cell adhesion // inferred from electronic annotation /// 8037 // cell recognition // non-traceable author statement	16020 // membrane // inferred from electronic annotation /// 16021 // integral to membrane // non-traceable author statement /// 5576 // extracellular region // inferred from electronic annotation /// 16021 // integral to membrane // inferred from electronic annotation	5515 // protein binding // inferred from electronic annotation /// 5179 // hormone activity // inferred from electronic annotation /// 5488 // binding // non-traceable author statement	---
218684_at	182.312	161.855	0.88779	-0.17171	0.00177096	LRRC8D	NM_018103	leucine rich repeat containing 8 family, member D	---	16020 // membrane // inferred from electronic annotation /// 16021 // integral to membrane // inferred from electronic annotation	5515 // protein binding // inferred from physical interaction	---
221221_s_at	206.006	177.571	0.86197	-0.214291	0.00177178	KLHL3	NM_017415	kelch-like 3 (Drosophila)	---	5856 // cytoskeleton // inferred from electronic annotation	3779 // actin binding // inferred from electronic annotation /// 5198 // structural molecule activity // traceable author statement /// 5515 // protein binding // inferred from electronic annotation	---
240491_at	310.779	249.066	0.801425	-0.31936	0.0017828	CHN2	AA702688	Chimerin (chimaerin) 2	7242 // intracellular signaling cascade // inferred from electronic annotation	---	5070 // SH3/SH2 adaptor activity // traceable author statement /// 5096 // GTPase activator activity // traceable author statement /// 8270 // zinc ion binding // inferred from electronic annotation /// 19992 // diacylglycerol binding // inferred from electronic annotation /// 46872 // metal ion binding // inferred from electronic annotation /// 5096 // GTPase activator activity // inferred from …	---
233365_at	276.829	196.373	0.709368	-0.495393	0.00181927	PRKG1	AU147809	Protein kinase, cGMP-dependent, type I	6468 // protein amino acid phosphorylation // inferred from electronic annotation /// 6468 // protein amino acid phosphorylation // traceable author statement /// 6940 // regulation of smooth muscle contraction // not recorded /// 7165 // signal transduction // traceable author statement /// 30036 // actin cytoskeleton organization and biogenesis // traceable author statement	5952 // cAMP-dependent protein kinase complex // inferred from electronic annotation	166 // nucleotide binding // inferred from electronic annotation /// 4674 // protein serine/threonine kinase activity // inferred from electronic annotation /// 4692 // cGMP-dependent protein kinase activity // inferred from electronic annotation /// 5524 // ATP binding // inferred from electronic annotation /// 8603 // cAMP-dependent protein kinase regulator activity // inferred from electronic …	---
237332_at	53.8458	42.0956	0.78178	-0.355165	0.00182431	---	AW341304	Transcribed locus	---	---	---	---
240835_at	52.4901	44.44	0.846636	-0.240187	0.00182515	---	BE671305	---	---	---	---	---
226126_at	241.484	186.333	0.771617	-0.374043	0.0018321	MGC16169	AA702160	hypothetical protein MGC16169	6468 // protein amino acid phosphorylation // inferred from electronic annotation	---	4672 // protein kinase activity // inferred from electronic annotation /// 5524 // ATP binding // inferred from electronic annotation /// 166 // nucleotide binding // inferred from electronic annotation /// 16301 // kinase activity // inferred from electronic annotation /// 16740 // transferase activity // inferred from electronic annotation	---
1569033_at	104.194	91.2574	0.875841	-0.19126	0.00183616	IGF2BP3	BC019258	insulin-like growth factor 2 mRNA binding protein 3	6396 // RNA processing // traceable author statement /// 6412 // protein biosynthesis // traceable author statement /// 9653 // morphogenesis // traceable author statement	5737 // cytoplasm // traceable author statement	166 // nucleotide binding // inferred from electronic annotation /// 3723 // RNA binding // traceable author statement /// 3676 // nucleic acid binding // inferred from electronic annotation	---
242614_at	104.307	90.9431	0.871882	-0.197795	0.00184013	---	BE408123	Transcribed locus	---	---	---	---
1559921_at	309.554	265.612	0.858049	-0.220869	0.00184041	PECAM1	AW138916	platelet/endothelial cell adhesion molecule (CD31 antigen)	6928 // cell motility // not recorded /// 7155 // cell adhesion // inferred from electronic annotation /// 7165 // signal transduction // traceable author statement /// 8037 // cell recognition // traceable author statement	5886 // plasma membrane // traceable author statement /// 5911 // intercellular junction // not recorded /// 16021 // integral to membrane // inferred from electronic annotation /// 16020 // membrane // inferred from electronic annotation	5515 // protein binding // inferred from electronic annotation	---
1558648_at	276.179	233.391	0.84507	-0.242858	0.00184299	CCDC32	AL832032	coiled-coil domain containing 32	---	---	---	---
200045_at	521.26	443.427	0.850682	-0.233308	0.00185239	ABCF1	NM_001090	ATP-binding cassette, sub-family F (GCN20), member 1 /// ATP-binding cassette, sub-family F (GCN20), member 1	6412 // protein biosynthesis // traceable author statement /// 6954 // inflammatory response // traceable author statement	---	166 // nucleotide binding // inferred from electronic annotation /// 5524 // ATP binding // inferred from electronic annotation /// 5524 // ATP binding // traceable author statement /// 8135 // translation factor activity, nucleic acid binding // traceable author statement /// 16887 // ATPase activity // inferred from electronic annotation /// 42626 // ATPase activity, coupled to transmembrane mo…	---
213046_at	207.634	167.833	0.808314	-0.307013	0.00185833	PABPN1	AI130920	poly(A) binding protein, nuclear 1	6397 // mRNA processing // inferred from electronic annotation /// 6936 // muscle contraction // traceable author statement /// 6396 // RNA processing // traceable author statement	5634 // nucleus // inferred from electronic annotation /// 5634 // nucleus // not recorded	166 // nucleotide binding // inferred from electronic annotation /// 3723 // RNA binding // traceable author statement /// 5515 // protein binding // inferred from physical interaction /// 3676 // nucleic acid binding // inferred from electronic annotation /// 3723 // RNA binding // inferred from electronic annotation	mRNA_processing_Reactome // GenMAPP
225311_at	215.068	179.561	0.834906	-0.260315	0.00187016	IVD	AA081349	isovaleryl Coenzyme A dehydrogenase	6118 // electron transport // inferred from electronic annotation	5739 // mitochondrion // inferred from electronic annotation /// 5759 // mitochondrial matrix // non-traceable author statement /// 5739 // mitochondrion // not recorded	8470 // isovaleryl-CoA dehydrogenase activity // traceable author statement /// 16491 // oxidoreductase activity // inferred from electronic annotation /// 3995 // acyl-CoA dehydrogenase activity // inferred from electronic annotation /// 8470 // isovaleryl-CoA dehydrogenase activity // inferred from electronic annotation	Valine, leucine and isoleucine degradation // KEGG
221025_x_at	158.953	134.382	0.84542	-0.24226	0.00187356	PUS7L	NM_031292	pseudouridylate synthase 7 homolog (S. cerevisiae)-like /// pseudouridylate synthase 7 homolog (S. cerevisiae)-like	8033 // tRNA processing // inferred from electronic annotation	---	4730 // pseudouridylate synthase activity // inferred from electronic annotation	---
229086_at	149.099	130.92	0.878071	-0.187591	0.00187357	LOC148898	AW298597	hypothetical protein BC007899	---	---	---	---
1558770_a_at	84.2061	67.4478	0.800984	-0.320154	0.00187506	C17orf38	AK091819	chromosome 17 open reading frame 38	---	---	16301 // kinase activity // inferred from electronic annotation	---
1565811_at	116.774	102.866	0.880901	-0.182947	0.00187667	---	BC033945	CDNA clone IMAGE:5278245	---	---	---	---
1563742_at	81.322	71.4431	0.878521	-0.186851	0.00187944	LOC643650	BC033221	hypothetical protein LOC643650	---	---	---	---
208004_at	200.223	157.874	0.788491	-0.342833	0.00188277	PROL1	NM_021225	proline rich, lacrimal 1	---	---	---	---
204987_at	156.767	116.483	0.743035	-0.428498	0.00188758	ITIH2	NM_002216	inter-alpha (globulin) inhibitor H2	30212 // hyaluronan metabolism // inferred from electronic annotation	5576 // extracellular region // non-traceable author statement	4867 // serine-type endopeptidase inhibitor activity // inferred from electronic annotation /// 4866 // endopeptidase inhibitor activity // inferred from electronic annotation /// 4866 // endopeptidase inhibitor activity // traceable author statement	---
1563706_at	76.1866	66.8424	0.877352	-0.188772	0.00188856	---	AL832705	MRNA; cDNA DKFZp313B1235 (from clone DKFZp313B1235)	---	---	---	---
1556422_at	206.722	177.038	0.856406	-0.223633	0.00188972	ZFP28	AK090676	Zinc finger protein 28 homolog (mouse)	6350 // transcription // inferred from electronic annotation /// 6355 // regulation of transcription, DNA-dependent // inferred from electronic annotation	5622 // intracellular // inferred from electronic annotation /// 5634 // nucleus // inferred from electronic annotation	3676 // nucleic acid binding // inferred from electronic annotation /// 3677 // DNA binding // inferred from electronic annotation /// 8270 // zinc ion binding // inferred from electronic annotation /// 46872 // metal ion binding // inferred from electronic annotation	---
241823_at	88.7074	72.7919	0.820584	-0.285277	0.00189548	---	AW243457	Transcribed locus	---	---	---	---
203585_at	288.366	201.349	0.698241	-0.518203	0.00189705	ZNF185	NM_007150	zinc finger protein 185 (LIM domain)	---	---	8270 // zinc ion binding // inferred from electronic annotation /// 8270 // zinc ion binding // traceable author statement /// 46872 // metal ion binding // inferred from electronic annotation	---
224759_s_at	166.605	219.105	1.31512	0.39519	0.00189802	C12orf23	AK001731	chromosome 12 open reading frame 23	---	---	---	---
239214_at	79.2478	59.4311	0.74994	-0.415152	0.001905	---	AA806831	CDNA clone IMAGE:7505105	---	---	---	---
205592_at	173.359	152.908	0.882032	-0.181097	0.00191831	SLC4A1	X77737	Solute carrier family 4, anion exchanger, member 1 (erythrocyte membrane protein band 3, Diego blood group)	6820 // anion transport // traceable author statement /// 6873 // cell ion homeostasis // traceable author statement /// 6810 // transport // inferred from electronic annotation /// 6811 // ion transport // inferred from electronic annotation /// 6820 // anion transport // inferred from electronic annotation	5887 // integral to plasma membrane // traceable author statement /// 16020 // membrane // inferred from electronic annotation /// 16021 // integral to membrane // inferred from electronic annotation	5452 // inorganic anion exchanger activity // inferred from electronic annotation /// 8509 // anion transporter activity // traceable author statement /// 15380 // anion exchanger activity // inferred from electronic annotation /// 15380 // anion exchanger activity // traceable author statement	---
1570384_at	60.1222	49.2101	0.818501	-0.288944	0.00192348	TAS2R14	AF116728	Taste receptor, type 2, member 14	7165 // signal transduction // inferred from electronic annotation /// 7186 // G-protein coupled receptor protein signaling pathway // inferred from electronic annotation /// 50896 // response to stimulus // inferred from electronic annotation /// 50909 // sensory perception of taste // inferred from electronic annotation /// 7582 // physiological process // traceable author statement /// 7601 //…	16020 // membrane // inferred from electronic annotation /// 16021 // integral to membrane // non-traceable author statement /// 16021 // integral to membrane // inferred from electronic annotation /// 5615 // extracellular space // traceable author statement	4872 // receptor activity // inferred from electronic annotation /// 4930 // G-protein coupled receptor activity // inferred from electronic annotation /// 8527 // taste receptor activity // traceable author statement /// 5515 // protein binding // inferred from physical interaction /// 1584 // rhodopsin-like receptor activity // inferred from electronic annotation /// 4871 // signal transducer a…	---
1560978_at	151.728	136.05	0.89667	-0.157351	0.00192398	---	AF088044	Full length insert cDNA clone ZD58F01	---	---	---	---
235242_at	189.969	161.409	0.84966	-0.235043	0.00192918	---	BE739287	CDNA FLJ41375 fis, clone BRCAN2007700	---	---	---	---
207422_at	73.2942	63.9958	0.873135	-0.195723	0.00193043	ADAM20	NM_003814	ADAM metallopeptidase domain 20	6508 // proteolysis // inferred from electronic annotation /// 7338 // fertilization (sensu Metazoa) // traceable author statement	16020 // membrane // inferred from electronic annotation /// 16021 // integral to membrane // inferred from electronic annotation	4222 // metalloendopeptidase activity // inferred from electronic annotation /// 8270 // zinc ion binding // inferred from electronic annotation /// 46872 // metal ion binding // inferred from electronic annotation /// 8233 // peptidase activity // inferred from electronic annotation /// 8237 // metallopeptidase activity // inferred from electronic annotation /// 16787 // hydrolase activity // in…	---
234196_at	68.7582	58.408	0.849469	-0.235366	0.00194004	TMCC3	AK025030	Transmembrane and coiled-coil domain family 3	---	16020 // membrane // inferred from electronic annotation /// 16021 // integral to membrane // inferred from electronic annotation	---	---
244424_at	104.25	82.9666	0.795841	-0.329447	0.00194205	LOC439938	BF055480	hypothetical gene supported by NM_178534	---	---	---	---
224289_s_at	55.9438	39.4969	0.70601	-0.502239	0.00194273	FKSG83	AF336874	FKSG83	7186 // G-protein coupled receptor protein signaling pathway // inferred from electronic annotation	16021 // integral to membrane // inferred from electronic annotation	16503 // pheromone receptor activity // inferred from electronic annotation	---
242106_at	64.8367	50.1856	0.77403	-0.369538	0.00194473	MAPK1	AW972669	Mitogen-activated protein kinase 1	6468 // protein amino acid phosphorylation // inferred from electronic annotation /// 6917 // induction of apoptosis // traceable author statement /// 6935 // chemotaxis // traceable author statement /// 6950 // response to stress // traceable author statement /// 7049 // cell cycle // inferred from electronic annotation /// 7165 // signal transduction // traceable author statement /// 7268 // sy…	---	166 // nucleotide binding // inferred from electronic annotation /// 4674 // protein serine/threonine kinase activity // inferred from electronic annotation /// 4707 // MAP kinase activity // traceable author statement /// 5524 // ATP binding // inferred from electronic annotation /// 16740 // transferase activity // inferred from electronic annotation /// 4672 // protein kinase activity // infer…	MAPK_Cascade // GenMAPP /// S1P_Signaling // GenMAPP
235898_at	50.714	42.5638	0.83929	-0.252758	0.00194544	---	AW105010	Transcribed locus	---	---	---	---
243630_at	171.624	138.516	0.807089	-0.309201	0.00194642	NDUFB1	BF528375	NADH dehydrogenase (ubiquinone) 1 beta subcomplex, 1, 7kDa	6118 // electron transport // inferred from electronic annotation	5739 // mitochondrion // inferred from electronic annotation	3954 // NADH dehydrogenase activity // inferred from electronic annotation /// 8137 // NADH dehydrogenase (ubiquinone) activity // traceable author statement /// 16491 // oxidoreductase activity // inferred from electronic annotation	Electron_Transport_Chain // GenMAPP
217625_x_at	217.541	164.613	0.756696	-0.402215	0.00194699	---	AA102667	Homo sapiens, clone IMAGE:3851018, mRNA	---	---	---	---
220875_at	105.872	90.8772	0.858369	-0.22033	0.00194729	---	NM_018576	---	---	---	---	---
1564277_a_at	350.739	278.351	0.793614	-0.333491	0.00194793	LOC286297	AK074198	hypothetical protein LOC286297	---	---	---	---
223321_s_at	212.654	174.765	0.821824	-0.283098	0.0019485	FGFRL1	AF312678	fibroblast growth factor receptor-like 1	7155 // cell adhesion // inferred from electronic annotation	16020 // membrane // inferred from electronic annotation /// 16021 // integral to membrane // inferred from electronic annotation	4872 // receptor activity // inferred from electronic annotation /// 5515 // protein binding // inferred from electronic annotation	Glycosaminoglycan degradation // KEGG /// Glycan structures - degradation // KEGG
1553241_at	128.187	108.178	0.843907	-0.244845	0.00195153	FAM77D	NM_173688	family with sequence similarity 77, member D	---	---	---	---
238992_at	43.2452	55.2683	1.27802	0.353912	0.0019548	---	AW129145	Transcribed locus, strongly similar to NP_009126.1 polymerase (DNA directed) iota; RAD30 (S. cerevisiae) homolog B; polymerase (DNA-directed), iota [Homo sapiens]	---	---	---	---
204532_x_at	114.71	102.988	0.897807	-0.155523	0.00195516	UGT1A10 /// UGT1A8 /// UGT1A7 /// UGT1A6 /// UGT1A5 /// UGT1A9 /// UGT1A4 /// UGT1A1 /// UGT1A3	NM_021027	UDP glucuronosyltransferase 1 family, polypeptide A10 /// UDP glucuronosyltransferase 1 family, polypeptide A8 /// UDP glucuronosyltransferase 1 family, polypeptide A7 /// UDP glucuronosyltransferase 1 family, polypeptide A6 /// UDP glucuronosyltransferase 1 family, polypeptide A5 /// UDP glucuronosyltransferase 1 family, polypeptide A9 /// UDP glucuronosyltransferase 1 family, polypeptide A4 ///…	8152 // metabolism // inferred from electronic annotation /// 8152 // metabolism // non-traceable author statement /// 8152 // metabolism // traceable author statement /// 6805 // xenobiotic metabolism // inferred from direct assay /// 6805 // xenobiotic metabolism // non-traceable author statement /// 6789 // bilirubin conjugation // traceable author statement /// 7586 // digestion // non-tracea…	5783 // endoplasmic reticulum // inferred from electronic annotation /// 5792 // microsome // inferred from electronic annotation /// 16020 // membrane // inferred from electronic annotation /// 16021 // integral to membrane // inferred from electronic annotation /// 5792 // microsome // non-traceable author statement /// 5783 // endoplasmic reticulum // traceable author statement	15020 // glucuronosyltransferase activity // inferred from electronic annotation /// 16758 // transferase activity, transferring hexosyl groups // inferred from electronic annotation /// 8194 // UDP-glycosyltransferase activity // traceable author statement /// 16740 // transferase activity // inferred from electronic annotation /// 15020 // glucuronosyltransferase activity // traceable author st…	Irinotecan_pathway_PharmGKB // GenMAPP /// Irinotecan_pathway_PharmGKB // GenMAPP /// Irinotecan_pathway_PharmGKB // GenMAPP /// Irinotecan_pathway_PharmGKB // GenMAPP /// Pentose and glucuronate interconversions // KEGG /// Androgen and estrogen metabolism // KEGG /// Starch and sucrose metabolism // KEGG /// Porphyrin and chlorophyll metabolism // KEGG /// Metabolism of xenobiotics by cytochrom…
1556747_a_at	346.052	291.598	0.842641	-0.247009	0.00196084	---	AI476341	CDNA FLJ39784 fis, clone SPLEN2002314	---	---	---	---
1554822_at	194.817	168.043	0.862565	-0.213295	0.00196504	PHTF2	BC022419	putative homeodomain transcription factor 2	---	---	---	---
224547_at	113.723	102.373	0.900196	-0.151689	0.00196863	---	L10404	Surfactant protein B-binding protein	15986 // ATP synthesis coupled proton transport // inferred from electronic annotation	16469 // proton-transporting two-sector ATPase complex // inferred from electronic annotation /// 5634 // nucleus // non-traceable author statement	5524 // ATP binding // inferred from electronic annotation /// 46933 // hydrogen-transporting ATP synthase activity, rotational mechanism // inferred from electronic annotation /// 46961 // hydrogen-transporting ATPase activity, rotational mechanism // inferred from electronic annotation /// 3677 // DNA binding // non-traceable author statement /// 16563 // transcriptional activator activity // n…	---
234900_at	61.8012	72.9424	1.18028	0.239123	0.00197214	---	AL031864	---	---	---	---	---
218554_s_at	268.917	214.079	0.796078	-0.329018	0.00197588	ASH1L	NM_018489	ash1 (absent, small, or homeotic)-like (Drosophila)	6355 // regulation of transcription, DNA-dependent // inferred from electronic annotation /// 6323 // DNA packaging // traceable author statement /// 6366 // transcription from RNA polymerase II promoter // traceable author statement /// 7267 // cell-cell signaling // traceable author statement	5634 // nucleus // traceable author statement /// 5923 // tight junction // traceable author statement	3677 // DNA binding // inferred from electronic annotation /// 5515 // protein binding // inferred from electronic annotation /// 8270 // zinc ion binding // inferred from electronic annotation /// 3702 // RNA polymerase II transcription factor activity // traceable author statement	---
244167_at	161.001	142.666	0.886115	-0.174433	0.00198078	SERGEF	AA878375	Secretion regulating guanine nucleotide exchange factor	7165 // signal transduction // traceable author statement /// 50709 // negative regulation of protein secretion // inferred from direct assay	5634 // nucleus // inferred from direct assay /// 5737 // cytoplasm // inferred from direct assay /// 5634 // nucleus // inferred from electronic annotation	5087 // Ran guanyl-nucleotide exchange factor activity // traceable author statement /// 5515 // protein binding // inferred from physical interaction /// 5085 // guanyl-nucleotide exchange factor activity // inferred from electronic annotation	---
244294_at	181.994	160.794	0.883516	-0.178672	0.00198151	---	AA461190	CDNA FLJ26260 fis, clone DMC05193	---	---	---	---
1570566_at	64.2461	52.6851	0.820051	-0.286214	0.00198372	BIRC1	AA604601	Baculoviral IAP repeat-containing 1	6915 // apoptosis // inferred from electronic annotation /// 6916 // anti-apoptosis // inferred from electronic annotation /// 6916 // anti-apoptosis // traceable author statement /// 7399 // nervous system development // traceable author statement	5622 // intracellular // inferred from electronic annotation	166 // nucleotide binding // inferred from electronic annotation /// 5524 // ATP binding // inferred from electronic annotation /// 17111 // nucleoside-triphosphatase activity // inferred from electronic annotation	---
231493_at	138.577	121.346	0.875659	-0.191559	0.00198558	---	R20660	Transcribed locus	---	---	---	---
236388_at	117.65	105.147	0.893732	-0.162086	0.00198932	---	BF112161	---	---	---	---	---
1564559_at	97.6946	78.4166	0.802671	-0.31712	0.00199089	---	AL833395	MRNA; cDNA DKFZp762K239 (from clone DKFZp762K239)	---	---	---	---
204829_s_at	252.164	185.256	0.734664	-0.444843	0.00199418	FOLR2	NM_000803	folate receptor 2 (fetal)	15884 // folic acid transport // traceable author statement	5624 // membrane fraction // traceable author statement /// 16020 // membrane // inferred from electronic annotation	4872 // receptor activity // inferred from electronic annotation /// 5542 // folic acid binding // traceable author statement /// 5542 // folic acid binding // inferred from electronic annotation	---
205759_s_at	253.96	203.121	0.799812	-0.322266	0.00200671	SULT2B1	NM_004605	sulfotransferase family, cytosolic, 2B, member 1	6629 // lipid metabolism // inferred from electronic annotation /// 8202 // steroid metabolism // inferred from direct assay /// 8202 // steroid metabolism // inferred from electronic annotation	5737 // cytoplasm // traceable author statement	4027 // alcohol sulfotransferase activity // inferred from electronic annotation /// 16740 // transferase activity // inferred from electronic annotation /// 50294 // steroid sulfotransferase activity // inferred from direct assay /// 8146 // sulfotransferase activity // inferred from electronic annotation	---
229559_at	139.259	118.653	0.852036	-0.231013	0.00200961	FLJ40125	BE732320	hypothetical protein FLJ40125	---	---	3824 // catalytic activity // inferred from electronic annotation	Integrin-mediated_cell_adhesion_KEGG // GenMAPP
223798_at	137.115	103.794	0.756985	-0.401663	0.00201003	SLC41A2	AL136828	solute carrier family 41, member 2	6812 // cation transport // inferred from electronic annotation	---	8324 // cation transporter activity // inferred from electronic annotation	---
228610_at	78.2396	65.4221	0.836177	-0.25812	0.00201547	TM9SF3	AI040432	Transmembrane 9 superfamily member 3	6810 // transport // inferred from electronic annotation	16020 // membrane // inferred from electronic annotation /// 16021 // integral to membrane // inferred from electronic annotation	5215 // transporter activity // inferred from electronic annotation /// 5488 // binding // inferred from direct assay	---
219884_at	192.952	153.433	0.795187	-0.330633	0.00201673	LHX6	NM_014368	LIM homeobox 6	6355 // regulation of transcription, DNA-dependent // inferred from electronic annotation /// 7420 // brain development // traceable author statement /// 6350 // transcription // inferred from electronic annotation /// 45449 // regulation of transcription // inferred from electronic annotation	5634 // nucleus // inferred from electronic annotation	3700 // transcription factor activity // inferred from electronic annotation /// 3700 // transcription factor activity // traceable author statement /// 8270 // zinc ion binding // inferred from electronic annotation /// 43565 // sequence-specific DNA binding // inferred from electronic annotation /// 46872 // metal ion binding // inferred from electronic annotation /// 3677 // DNA binding // inf…	---
1566678_at	50.5032	42.5374	0.842272	-0.247642	0.00202066	MMP2	AK057680	Matrix metallopeptidase 2 (gelatinase A, 72kDa gelatinase, 72kDa type IV collagenase)	270 // peptidoglycan metabolism // inferred from electronic annotation /// 6508 // proteolysis // traceable author statement /// 30574 // collagen catabolism // inferred from electronic annotation /// 6508 // proteolysis // inferred from electronic annotation	5578 // extracellular matrix (sensu Metazoa) // inferred from electronic annotation /// 5615 // extracellular space // traceable author statement	4228 // gelatinase A activity // traceable author statement /// 5509 // calcium ion binding // inferred from electronic annotation /// 8270 // zinc ion binding // traceable author statement /// 4222 // metalloendopeptidase activity // inferred from electronic annotation /// 4228 // gelatinase A activity // inferred from electronic annotation /// 8233 // peptidase activity // inferred from electro…	Matrix_Metalloproteinases // GenMAPP /// Leukocyte transendothelial migration // KEGG
214339_s_at	252.801	199.284	0.788302	-0.34318	0.00202369	MAP4K1	AA744529	mitogen-activated protein kinase kinase kinase kinase 1	185 // activation of MAPKKK activity // Unknown /// 6950 // response to stress // inferred from direct assay /// 7243 // protein kinase cascade // inferred from direct assay /// 7257 // activation of JNK activity // traceable author statement /// 18105 // peptidyl-serine phosphorylation // inferred from direct assay /// 45610 // regulation of hemocyte differentiation // inferred from sequence or …	---	166 // nucleotide binding // inferred from electronic annotation /// 4674 // protein serine/threonine kinase activity // inferred from direct assay /// 5083 // small GTPase regulator activity // inferred from electronic annotation /// 5515 // protein binding // inferred from physical interaction /// 5524 // ATP binding // inferred from direct assay /// 8349 // MAP kinase kinase kinase kinase acti…	---
242971_at	61.1152	53.6337	0.877583	-0.188393	0.00202547	---	BF514491	---	---	---	---	---
212487_at	320.652	278.842	0.86961	-0.201559	0.00202807	KIAA0553	AI673812	KIAA0553	---	---	---	---
216186_at	258.511	220.215	0.851857	-0.231316	0.00203134	C1orf20	T90013	chromosome 1 open reading frame 20	---	---	---	---
220750_s_at	120.85	103.514	0.856547	-0.223396	0.00203815	LEPRE1	NM_022356	leucine proline-enriched proteoglycan (leprecan) 1	8285 // negative regulation of cell proliferation // non-traceable author statement /// 19538 // protein metabolism // inferred from electronic annotation	5783 // endoplasmic reticulum // inferred from electronic annotation	5488 // binding // inferred from electronic annotation /// 16706 // oxidoreductase activity, acting on paired donors, with incorporation or reduction of molecular oxygen, 2-oxoglutarate as one donor, and incorporation of one atom each of oxygen into both donors // inferred from electronic annotation /// 5506 // iron ion binding // inferred from electronic annotation /// 16491 // oxidoreductase ac…	---
221073_s_at	329.494	256.102	0.777259	-0.363533	0.00203831	CARD4	NM_006092	caspase recruitment domain family, member 4	6952 // defense response // traceable author statement /// 6954 // inflammatory response // traceable author statement /// 7165 // signal transduction // traceable author statement /// 9595 // detection of biotic stimulus // traceable author statement /// 42981 // regulation of apoptosis // inferred from electronic annotation /// 43123 // positive regulation of I-kappaB kinase/NF-kappaB cascade /…	5737 // cytoplasm // traceable author statement /// 5622 // intracellular // inferred from electronic annotation	166 // nucleotide binding // inferred from electronic annotation /// 4871 // signal transducer activity // inferred from expression pattern /// 5515 // protein binding // inferred from physical interaction /// 5524 // ATP binding // inferred from electronic annotation /// 8656 // caspase activator activity // traceable author statement /// 42834 // peptidoglycan binding // traceable author statem…	---
1562834_at	200.495	168.485	0.840345	-0.250947	0.0020391	---	BC037537	CDNA clone IMAGE:5284619	---	---	---	---
240495_at	79.3947	65.7629	0.828304	-0.271768	0.00203948	---	AI018790	CDNA clone IMAGE:5266735	---	---	---	---
220115_s_at	206.099	183.09	0.888363	-0.170779	0.00204422	CDH10	NM_006727	cadherin 10, type 2 (T2-cadherin)	7156 // homophilic cell adhesion // non-traceable author statement /// 7155 // cell adhesion // inferred from electronic annotation /// 7156 // homophilic cell adhesion // inferred from electronic annotation /// 16337 // cell-cell adhesion // non-traceable author statement	16020 // membrane // inferred from electronic annotation /// 16021 // integral to membrane // non-traceable author statement /// 16021 // integral to membrane // inferred from electronic annotation	5509 // calcium ion binding // inferred from electronic annotation /// 5515 // protein binding // inferred from electronic annotation	---
224788_at	227.903	271.373	1.19074	0.251857	0.00205952	ARF6	AV700721	ADP-ribosylation factor 6	6364 // rRNA processing // inferred from electronic annotation /// 6888 // ER to Golgi vesicle-mediated transport // inferred from electronic annotation /// 6928 // cell motility // traceable author statement /// 7155 // cell adhesion // traceable author statement /// 7264 // small GTPase mediated signal transduction // inferred from electronic annotation /// 15031 // protein transport // inferre…	1726 // ruffle // inferred from direct assay /// 5622 // intracellular // inferred from electronic annotation /// 5768 // endosome // traceable author statement /// 5795 // Golgi stack // inferred from electronic annotation /// 5886 // plasma membrane // inferred from direct assay /// 5938 // cell cortex // inferred from direct assay	166 // nucleotide binding // inferred from electronic annotation /// 5515 // protein binding // inferred from physical interaction /// 5525 // GTP binding // traceable author statement /// 5525 // GTP binding // inferred from electronic annotation	---
244324_at	51.8302	39.7716	0.767343	-0.382057	0.00206153	C18orf54	BG283921	chromosome 18 open reading frame 54	---	---	---	---
237398_at	79.6433	66.7256	0.837805	-0.255314	0.00206685	---	AA890487	Transcribed locus	---	---	---	---
1555659_a_at	160.977	133.427	0.828858	-0.270804	0.0020709	TREML1	AF534823	triggering receptor expressed on myeloid cells-like 1	---	---	4872 // receptor activity // inferred from electronic annotation	---
229757_at	291.617	229.514	0.78704	-0.34549	0.00207694	LOC92345	AI741365	Hypothetical protein BC008207	---	---	---	---
224500_s_at	228.38	198.937	0.87108	-0.199122	0.00209576	MON1A	BC006299	MON1 homolog A (yeast) /// MON1 homolog A (yeast)	6810 // transport // inferred from electronic annotation	---	---	---
218224_at	150.152	193.257	1.28707	0.364089	0.00209851	PNMA1	NM_006029	paraneoplastic antigen MA1	7283 // spermatogenesis // traceable author statement /// 7417 // central nervous system development // traceable author statement	5634 // nucleus // inferred from electronic annotation /// 5730 // nucleolus // traceable author statement /// 5737 // cytoplasm // traceable author statement	5515 // protein binding // inferred from physical interaction	---
226808_at	50.4074	41.6372	0.826013	-0.275763	0.00210163	LOC643641	AW771007	Hypothetical protein LOC643641	6118 // electron transport // inferred from electronic annotation /// 6355 // regulation of transcription, DNA-dependent // inferred from electronic annotation /// 7155 // cell adhesion // inferred from electronic annotation	5576 // extracellular region // inferred from electronic annotation /// 5622 // intracellular // inferred from electronic annotation	3676 // nucleic acid binding // inferred from electronic annotation /// 4867 // serine-type endopeptidase inhibitor activity // inferred from electronic annotation /// 5179 // hormone activity // inferred from electronic annotation /// 5507 // copper ion binding // inferred from electronic annotation /// 46983 // protein dimerization activity // inferred from electronic annotation	---
1562844_at	173.514	142.682	0.822306	-0.282252	0.00210406	LOC339822	BC043553	hypothetical protein LOC339822	---	---	---	---
203612_at	379.684	325.043	0.856087	-0.224171	0.00211154	BYSL	NM_004053	bystin-like	7155 // cell adhesion // traceable author statement /// 7565 // pregnancy // traceable author statement /// 7155 // cell adhesion // inferred from electronic annotation	5737 // cytoplasm // traceable author statement	5515 // protein binding // inferred from electronic annotation	---
235310_at	115.317	91.5211	0.793651	-0.333423	0.0021367	GCET2	W94993	germinal center expressed transcript 2	---	---	---	---
200052_s_at	186.791	215.861	1.15563	0.20868	0.00213967	ILF2	NM_004515	interleukin enhancer binding factor 2, 45kDa /// interleukin enhancer binding factor 2, 45kDa	6350 // transcription // inferred from electronic annotation /// 6955 // immune response // inferred from electronic annotation /// 45893 // positive regulation of transcription, DNA-dependent // inferred from direct assay /// 6355 // regulation of transcription, DNA-dependent // inferred from electronic annotation	5634 // nucleus // inferred from direct assay /// 5730 // nucleolus // inferred from direct assay /// 5634 // nucleus // inferred from electronic annotation	3677 // DNA binding // inferred from direct assay /// 3702 // RNA polymerase II transcription factor activity // traceable author statement /// 3723 // RNA binding // inferred from electronic annotation /// 3725 // double-stranded RNA binding // inferred from direct assay /// 5515 // protein binding // inferred from physical interaction /// 5524 // ATP binding // inferred from electronic annotati…	---
224402_s_at	83.4961	58.0609	0.695372	-0.524142	0.00214017	FCRL4	AF343660	Fc receptor-like 4 /// Fc receptor-like 4	---	---	4872 // receptor activity // inferred from electronic annotation	---
229470_at	129.432	108.433	0.837761	-0.25539	0.00214592	FAM105B	AW451634	Family with sequence similarity 105, member B	---	---	---	---
200853_at	483.606	587.053	1.21391	0.279658	0.00215481	H2AFZ	NM_002106	H2A histone family, member Z	6334 // nucleosome assembly // inferred from electronic annotation /// 7001 // chromosome organization and biogenesis (sensu Eukaryota) // inferred from electronic annotation	786 // nucleosome // inferred from electronic annotation /// 5634 // nucleus // inferred from electronic annotation /// 5694 // chromosome // inferred from electronic annotation	3677 // DNA binding // inferred from electronic annotation	Proteasome_Degradation // GenMAPP /// Proteasome_Degradation // GenMAPP /// Proteasome_Degradation // GenMAPP
219257_s_at	145.871	126.407	0.866569	-0.206613	0.00216961	SPHK1	NM_021972	sphingosine kinase 1	6670 // sphingosine metabolism // traceable author statement /// 6916 // anti-apoptosis // traceable author statement /// 7186 // G-protein coupled receptor protein signaling pathway // traceable author statement /// 7205 // protein kinase C activation // inferred from electronic annotation /// 7242 // intracellular signaling cascade // inferred from sequence or structural similarity /// 7242 // …	5624 // membrane fraction // inferred from sequence or structural similarity /// 5624 // membrane fraction // traceable author statement /// 5625 // soluble fraction // inferred from direct assay /// 5829 // cytosol // inferred from sequence or structural similarity /// 5829 // cytosol // traceable author statement /// 5624 // membrane fraction // inferred from direct assay /// 5737 // cytoplasm …	166 // nucleotide binding // inferred from electronic annotation /// 287 // magnesium ion binding // inferred from direct assay /// 287 // magnesium ion binding // inferred from sequence or structural similarity /// 3677 // DNA binding // inferred from direct assay /// 4143 // diacylglycerol kinase activity // inferred from electronic annotation /// 5516 // calmodulin binding // inferred from dir…	S1P_Signaling // GenMAPP /// S1P_Signaling // GenMAPP /// S1P_Signaling // GenMAPP /// S1P_Signaling // GenMAPP /// S1P_Signaling // GenMAPP
1569978_x_at	88.7212	68.9532	0.77719	-0.363661	0.00217232	---	BC026857	Homo sapiens, clone IMAGE:4429647, mRNA	---	---	---	---
205648_at	126.068	107.012	0.848842	-0.236432	0.00217359	WNT2	NM_003391	wingless-type MMTV integration site family member 2	7223 // frizzled-2 signaling pathway // inferred from electronic annotation /// 7275 // development // non-traceable author statement /// 7275 // development // inferred from electronic annotation /// 16055 // Wnt receptor signaling pathway // inferred from electronic annotation	5576 // extracellular region // non-traceable author statement /// 5576 // extracellular region // inferred from electronic annotation	4871 // signal transducer activity // inferred from electronic annotation /// 5201 // extracellular matrix structural constituent // non-traceable author statement	Wnt_signaling // GenMAPP
1561171_a_at	1082.31	762.946	0.704925	-0.504459	0.0021739	LOC283767 /// FLJ36131 /// LOC440243 /// LOC440247 /// LOC440320 /// LOC645202 /// LOC646145	AK093450	FLJ40198 protein /// hypothetical protein FLJ36131 /// similar to cis-Golgi matrix protein GM130 /// similar to cis-Golgi matrix protein GM130 /// similar to cis-Golgi matrix protein GM130 /// similar to cis-Golgi matrix protein GM130 /// similar to cis-Golgi matrix protein GM130	---	---	---	---
240276_at	182.441	156.027	0.855217	-0.225637	0.00218961	---	AW290978	Transcribed locus	---	---	---	---
208739_x_at	400.29	467.722	1.16846	0.224607	0.00219543	SUMO2	L76416	SMT3 suppressor of mif two 3 homolog 2 (S. cerevisiae)	6512 // ubiquitin cycle // inferred from electronic annotation /// 6464 // protein modification // inferred from electronic annotation	5634 // nucleus // inferred from electronic annotation	5515 // protein binding // inferred from physical interaction	---
206585_at	102.111	86.5828	0.847928	-0.237986	0.00220828	MKRN3	NM_005664	makorin, ring finger protein, 3	---	30529 // ribonucleoprotein complex // traceable author statement	3676 // nucleic acid binding // inferred from electronic annotation /// 5515 // protein binding // inferred from electronic annotation /// 8270 // zinc ion binding // inferred from electronic annotation /// 46872 // metal ion binding // inferred from electronic annotation	---
1560451_at	201.964	179.538	0.88896	-0.169809	0.00220905	PKN3	BM563673	Protein kinase N3	6468 // protein amino acid phosphorylation // inferred from electronic annotation /// 7165 // signal transduction // inferred from electronic annotation	5634 // nucleus // inferred from electronic annotation /// 5622 // intracellular // inferred from electronic annotation	166 // nucleotide binding // inferred from electronic annotation /// 4674 // protein serine/threonine kinase activity // inferred from electronic annotation /// 5524 // ATP binding // inferred from electronic annotation /// 16740 // transferase activity // inferred from electronic annotation /// 4672 // protein kinase activity // inferred from electronic annotation /// 16301 // kinase activity //…	---
226348_at	111.77	143.628	1.28504	0.361811	0.00220995	---	AK026764	---	---	---	---	---
1554062_at	71.6939	60.599	0.845246	-0.242556	0.00221298	XG	AF380356	Xg blood group	---	16020 // membrane // non-traceable author statement /// 16021 // integral to membrane // inferred from electronic annotation /// 16020 // membrane // inferred from electronic annotation	---	---
205491_s_at	103.219	88.7661	0.859977	-0.217629	0.00221449	GJB3	NM_024009	gap junction protein, beta 3, 31kDa (connexin 31)	7154 // cell communication // non-traceable author statement /// 7605 // sensory perception of sound // inferred from electronic annotation /// 7154 // cell communication // inferred from electronic annotation	5922 // connexon complex // inferred from electronic annotation /// 16020 // membrane // inferred from electronic annotation /// 16021 // integral to membrane // inferred from electronic annotation /// 5921 // gap junction // inferred from electronic annotation /// 5921 // gap junction // non-traceable author statement	15285 // connexon channel activity // inferred from electronic annotation /// 5243 // gap-junction forming channel activity // non-traceable author statement	Calcium_regulation_in_cardiac_cells // GenMAPP
206039_at	129.287	114.207	0.883361	-0.178925	0.00221915	RAB33A	NM_004794	RAB33A, member RAS oncogene family	7264 // small GTPase mediated signal transduction // inferred from electronic annotation /// 15031 // protein transport // inferred from electronic annotation	16020 // membrane // inferred from electronic annotation	166 // nucleotide binding // inferred from electronic annotation /// 3924 // GTPase activity // traceable author statement /// 5525 // GTP binding // inferred from electronic annotation	---
244475_at	90.443	80.7176	0.892469	-0.164126	0.00223791	LOC646951	AW296024	Similar to CG14142-PA	---	---	---	---
241822_at	107.056	90.5678	0.845989	-0.24129	0.00223829	SIX5	AW297226	Sine oculis homeobox homolog 5 (Drosophila)	6355 // regulation of transcription, DNA-dependent // inferred from electronic annotation /// 7275 // development // inferred from electronic annotation /// 6350 // transcription // inferred from electronic annotation /// 45449 // regulation of transcription // inferred from electronic annotation	5634 // nucleus // inferred from electronic annotation	3700 // transcription factor activity // inferred from electronic annotation /// 43565 // sequence-specific DNA binding // inferred from electronic annotation /// 3677 // DNA binding // inferred from electronic annotation	---
219528_s_at	59.3118	48.572	0.818927	-0.288194	0.00223997	BCL11B	NM_022898	B-cell CLL/lymphoma 11B (zinc finger protein)	6350 // transcription // inferred from electronic annotation /// 6355 // regulation of transcription, DNA-dependent // inferred from electronic annotation	5634 // nucleus // inferred from electronic annotation	3676 // nucleic acid binding // inferred from electronic annotation /// 8270 // zinc ion binding // inferred from electronic annotation /// 46872 // metal ion binding // inferred from electronic annotation	---
241584_at	95.7114	79.3634	0.829195	-0.270217	0.00224606	GHR	AA682452	Growth hormone receptor	1501 // skeletal development // traceable author statement /// 6897 // endocytosis // inferred from electronic annotation /// 40007 // growth // traceable author statement	5887 // integral to plasma membrane // traceable author statement /// 16020 // membrane // inferred from electronic annotation /// 16021 // integral to membrane // inferred from electronic annotation	4872 // receptor activity // inferred from electronic annotation /// 4903 // growth hormone receptor activity // traceable author statement /// 5515 // protein binding // inferred from physical interaction /// 4896 // hematopoietin/interferon-class (D200-domain) cytokine receptor activity // inferred from electronic annotation	---
223884_at	219.339	178.763	0.815008	-0.295114	0.00224946	OPTC	AF161702	opticin	---	5578 // extracellular matrix (sensu Metazoa) // traceable author statement /// 5578 // extracellular matrix (sensu Metazoa) // inferred from electronic annotation	5201 // extracellular matrix structural constituent // traceable author statement	---
240704_at	82.1984	70.7552	0.860785	-0.216274	0.00225494	FLJ23235	AA648486	Hypothetical protein FLJ23235	---	---	---	---
216034_at	139.383	120.284	0.862981	-0.2126	0.00226889	SUHW1	AA558468	suppressor of hairy wing homolog 1 (Drosophila)	6350 // transcription // inferred from electronic annotation /// 6355 // regulation of transcription, DNA-dependent // inferred from electronic annotation	5634 // nucleus // inferred from electronic annotation	3677 // DNA binding // inferred from electronic annotation /// 8270 // zinc ion binding // inferred from electronic annotation /// 46872 // metal ion binding // inferred from electronic annotation /// 3676 // nucleic acid binding // inferred from electronic annotation	---
204985_s_at	113.175	103.353	0.91321	-0.130981	0.00227677	TRAPPC6A	NM_024108	trafficking protein particle complex 6A	---	---	---	---
204559_s_at	161.899	192.306	1.18782	0.248313	0.00227973	LSM7	NM_016199	LSM7 homolog, U6 small nuclear RNA associated (S. cerevisiae)	398 // nuclear mRNA splicing, via spliceosome // non-traceable author statement /// 398 // nuclear mRNA splicing, via spliceosome // inferred from electronic annotation /// 6397 // mRNA processing // inferred from electronic annotation	5634 // nucleus // non-traceable author statement /// 5732 // small nucleolar ribonucleoprotein complex // inferred from electronic annotation /// 5634 // nucleus // inferred from electronic annotation /// 30529 // ribonucleoprotein complex // inferred from electronic annotation	3723 // RNA binding // inferred from electronic annotation /// 5515 // protein binding // inferred from physical interaction /// 17070 // U6 snRNA binding // non-traceable author statement	mRNA_processing_Reactome // GenMAPP
213218_at	214.974	177.111	0.823873	-0.279507	0.00228255	ZNF187	AV705032	zinc finger protein 187	6355 // regulation of transcription, DNA-dependent // non-traceable author statement /// 6355 // regulation of transcription, DNA-dependent // inferred from electronic annotation	5634 // nucleus // inferred from electronic annotation /// 5634 // nucleus // non-traceable author statement	3676 // nucleic acid binding // inferred from electronic annotation /// 3700 // transcription factor activity // non-traceable author statement /// 8270 // zinc ion binding // inferred from electronic annotation /// 46872 // metal ion binding // inferred from electronic annotation /// 3700 // transcription factor activity // inferred from electronic annotation	---
210596_at	134.724	109.61	0.81359	-0.297626	0.00229103	---	AF130104	---	---	---	---	---
226276_at	80.6699	98.3274	1.21889	0.285564	0.00229593	MGC23909	BF439522	hypothetical protein MGC23909	---	---	---	---
229004_at	154.108	132.894	0.862341	-0.21367	0.00230898	---	AI970797	CDNA FLJ26557 fis, clone LNF01992	---	---	---	---
226426_at	114.209	140.078	1.22651	0.294553	0.00230922	---	BG149849	---	---	---	---	---
221084_at	95.4988	85.0169	0.890241	-0.167733	0.00231379	HTR3B	NM_006028	5-hydroxytryptamine (serotonin) receptor 3B	6811 // ion transport // inferred from electronic annotation /// 7268 // synaptic transmission // traceable author statement /// 6810 // transport // inferred from electronic annotation /// 6810 // transport // traceable author statement	5887 // integral to plasma membrane // traceable author statement /// 45211 // postsynaptic membrane // inferred from electronic annotation /// 16020 // membrane // inferred from electronic annotation /// 16021 // integral to membrane // inferred from electronic annotation	4993 // serotonin receptor activity // traceable author statement /// 5216 // ion channel activity // traceable author statement /// 5230 // extracellular ligand-gated ion channel activity // inferred from electronic annotation /// 5232 // serotonin-activated cation-selective channel activity // traceable author statement /// 30594 // neurotransmitter receptor activity // inferred from electronic…	---
223517_at	122.17	105.674	0.864969	-0.20928	0.00231894	FBXO44	AV722616	F-box protein 44	6512 // ubiquitin cycle // inferred from electronic annotation /// 30163 // protein catabolism // inferred from electronic annotation	---	5515 // protein binding // inferred from electronic annotation	---
229054_at	158.414	129.362	0.816604	-0.292291	0.00232255	FLJ39779	AI935766	FLJ39779 protein	---	---	---	---
221146_at	195.979	155.246	0.792156	-0.336143	0.00232769	---	NM_018532	---	---	---	---	---
244394_at	119.935	107.065	0.892693	-0.163763	0.00234971	BLK	AI440386	B lymphoid tyrosine kinase	6468 // protein amino acid phosphorylation // inferred from electronic annotation /// 7242 // intracellular signaling cascade // inferred from electronic annotation /// 7243 // protein kinase cascade // traceable author statement	---	166 // nucleotide binding // inferred from electronic annotation /// 4713 // protein-tyrosine kinase activity // inferred from electronic annotation /// 4713 // protein-tyrosine kinase activity // traceable author statement /// 5524 // ATP binding // inferred from electronic annotation /// 16740 // transferase activity // inferred from electronic annotation /// 4672 // protein kinase activity // …	---
224140_at	95.6242	84.0657	0.879125	-0.185859	0.00235384	NPCDR1	AF134979	nasopharyngeal carcinoma, down-regulated 1	---	---	---	---
242354_at	231.341	167.268	0.723036	-0.467861	0.00236387	---	AI191905	---	---	---	---	---
1556464_a_at	265.728	217.678	0.819175	-0.287756	0.00237519	LOC257407	AF086098	hypothetical protein LOC257407	---	---	---	---
203529_at	649.262	563.21	0.867461	-0.205128	0.00238854	PPP6C	NM_016294	protein phosphatase 6, catalytic subunit	82 // G1/S transition of mitotic cell cycle // traceable author statement /// 6470 // protein amino acid dephosphorylation // traceable author statement	---	4722 // protein serine/threonine phosphatase activity // traceable author statement /// 5506 // iron ion binding // inferred from electronic annotation /// 16787 // hydrolase activity // inferred from electronic annotation /// 30145 // manganese ion binding // inferred from electronic annotation /// 46872 // metal ion binding // inferred from electronic annotation /// 4721 // phosphoprotein phosp…	---
219542_at	149.933	130.334	0.869278	-0.20211	0.00239243	NEK11	NM_024800	NIMA (never in mitosis gene a)- related kinase 11	6468 // protein amino acid phosphorylation // inferred from direct assay /// 7049 // cell cycle // inferred from electronic annotation /// 7243 // protein kinase cascade // inferred from direct assay /// 31573 // intra-S DNA damage checkpoint // inferred from direct assay /// 6468 // protein amino acid phosphorylation // inferred from electronic annotation	5634 // nucleus // inferred from electronic annotation /// 5730 // nucleolus // inferred from direct assay	166 // nucleotide binding // inferred from electronic annotation /// 287 // magnesium ion binding // inferred from electronic annotation /// 4674 // protein serine/threonine kinase activity // inferred from direct assay /// 5524 // ATP binding // inferred from direct assay /// 16740 // transferase activity // inferred from electronic annotation /// 30145 // manganese ion binding // inferred from …	---
238285_at	70.7311	61.2923	0.866554	-0.206638	0.00239295	SOX5	BE467463	SRY (sex determining region Y)-box 5	6350 // transcription // inferred from electronic annotation /// 6355 // regulation of transcription, DNA-dependent // inferred from electronic annotation /// 6366 // transcription from RNA polymerase II promoter // traceable author statement /// 16049 // cell growth // traceable author statement	5634 // nucleus // inferred from electronic annotation	3700 // transcription factor activity // traceable author statement /// 3677 // DNA binding // inferred from electronic annotation /// 5026 // transforming growth factor beta receptor activity, type II // traceable author statement	---
213592_at	358.411	265.682	0.741277	-0.431914	0.00239571	AGTRL1	X89271	angiotensin II receptor-like 1	7165 // signal transduction // inferred from electronic annotation /// 7186 // G-protein coupled receptor protein signaling pathway // inferred from electronic annotation /// 7186 // G-protein coupled receptor protein signaling pathway // traceable author statement	5886 // plasma membrane // traceable author statement /// 5887 // integral to plasma membrane // traceable author statement /// 16020 // membrane // inferred from electronic annotation /// 16021 // integral to membrane // inferred from electronic annotation	1584 // rhodopsin-like receptor activity // inferred from electronic annotation /// 4872 // receptor activity // inferred from electronic annotation /// 4872 // receptor activity // traceable author statement /// 4871 // signal transducer activity // inferred from electronic annotation /// 4930 // G-protein coupled receptor activity // inferred from electronic annotation /// 4930 // G-protein cou…	GPCRDB_Class_A_Rhodopsin-like // GenMAPP /// GPCRDB_Class_A_Rhodopsin-like // GenMAPP
222094_at	128.309	104.894	0.817507	-0.290697	0.00239918	SULT1A3	AI580112	sulfotransferase family, cytosolic, 1A, phenol-preferring, member 3	6584 // catecholamine metabolism // inferred from electronic annotation /// 6629 // lipid metabolism // inferred from electronic annotation /// 7268 // synaptic transmission // not recorded /// 8202 // steroid metabolism // inferred from electronic annotation	5737 // cytoplasm // traceable author statement	4062 // aryl sulfotransferase activity // traceable author statement /// 16740 // transferase activity // inferred from electronic annotation /// 4062 // aryl sulfotransferase activity // inferred from electronic annotation /// 8146 // sulfotransferase activity // inferred from electronic annotation	Sulfur metabolism // KEGG
1557487_at	95.0343	123.669	1.30131	0.379962	0.00239918	---	BC030754	CDNA clone IMAGE:4797099	---	---	---	---
226163_at	155.172	134.621	0.867556	-0.204971	0.00239926	ZBTB9	AW291499	zinc finger and BTB domain containing 9	6350 // transcription // inferred from electronic annotation /// 6355 // regulation of transcription, DNA-dependent // inferred from electronic annotation	5634 // nucleus // inferred from electronic annotation	3677 // DNA binding // inferred from electronic annotation /// 5515 // protein binding // inferred from electronic annotation /// 8270 // zinc ion binding // inferred from electronic annotation /// 46872 // metal ion binding // inferred from electronic annotation /// 3676 // nucleic acid binding // inferred from electronic annotation /// 5096 // GTPase activator activity // inferred from electron…	---
227786_at	156.626	136.006	0.86835	-0.203651	0.00241538	THRAP6	AI026938	thyroid hormone receptor associated protein 6	6367 // transcription initiation from RNA polymerase II promoter // inferred from direct assay /// 30518 // steroid hormone receptor signaling pathway // inferred from direct assay /// 30521 // androgen receptor signaling pathway // inferred from direct assay	119 // mediator complex // inferred from direct assay /// 5634 // nucleus // inferred from direct assay	3712 // transcription cofactor activity // inferred from direct assay /// 4872 // receptor activity // inferred from direct assay /// 16455 // RNA polymerase II transcription mediator activity // inferred from direct assay /// 16563 // transcriptional activator activity // inferred from direct assay /// 46966 // thyroid hormone receptor binding // inferred from direct assay /// 30374 // ligand-de…	Apoptosis // GenMAPP
1569030_s_at	405.374	323.595	0.798263	-0.325064	0.00241705	NYREN18	BC034716	NEDD8 ultimate buster-1	---	5634 // nucleus // inferred from electronic annotation	5488 // binding // inferred from electronic annotation	---
237176_at	191.93	158.078	0.823624	-0.279943	0.00242054	LCP1	AW205969	Lymphocyte cytosolic protein 1 (L-plastin)	---	5829 // cytosol // inferred from direct assay /// 5737 // cytoplasm // non-traceable author statement	3779 // actin binding // inferred from electronic annotation /// 3779 // actin binding // non-traceable author statement /// 5509 // calcium ion binding // inferred from electronic annotation /// 5509 // calcium ion binding // non-traceable author statement /// 5515 // protein binding // inferred from physical interaction	---
225749_at	172.076	191.586	1.11338	0.154942	0.00242972	LOC283951	BE889319	Hypothetical protein LOC283951	---	---	---	---
220521_s_at	71.1946	62.7883	0.881926	-0.18127	0.00244218	ATG16L1	NM_017974	ATG16 autophagy related 16-like 1 (S. cerevisiae)	6914 // autophagy // inferred from electronic annotation /// 15031 // protein transport // inferred from electronic annotation /// 6810 // transport // inferred from electronic annotation	16020 // membrane // inferred from electronic annotation	---	---
1554116_s_at	90.581	75.4124	0.832542	-0.264406	0.00244287	PARP11	BC031073	poly (ADP-ribose) polymerase family, member 11	6471 // protein amino acid ADP-ribosylation // inferred from electronic annotation	5634 // nucleus // inferred from electronic annotation	3950 // NAD+ ADP-ribosyltransferase activity // inferred from electronic annotation	---
1565849_a_at	68.9813	56.9549	0.825657	-0.276386	0.00244453	C19orf37	BG720339	Chromosome 19 open reading frame 37	---	5634 // nucleus // inferred from electronic annotation	3676 // nucleic acid binding // inferred from electronic annotation /// 8270 // zinc ion binding // inferred from electronic annotation /// 46872 // metal ion binding // inferred from electronic annotation	---
53912_at	174.157	154.335	0.886184	-0.174321	0.00246032	SNX11	AI668643	sorting nexin 11	7242 // intracellular signaling cascade // inferred from electronic annotation /// 15031 // protein transport // inferred from electronic annotation /// 6810 // transport // inferred from electronic annotation	---	5515 // protein binding // inferred from electronic annotation /// 35091 // phosphoinositide binding // inferred from electronic annotation	---
242747_at	68.909	55.7424	0.808928	-0.305916	0.00246912	---	AW129128	---	---	---	---	---
41329_at	53.9797	65.4948	1.21332	0.278964	0.00247683	SCYL3	AI458463	SCY1-like 3 (S. cerevisiae)	6468 // protein amino acid phosphorylation // inferred from electronic annotation /// 16477 // cell migration // non-traceable author statement	5795 // Golgi stack // inferred from electronic annotation /// 30027 // lamellipodium // inferred from direct assay /// 5737 // cytoplasm // inferred from direct assay /// 5794 // Golgi apparatus // inferred from direct assay	4672 // protein kinase activity // inferred from electronic annotation /// 5515 // protein binding // inferred from physical interaction /// 5524 // ATP binding // inferred from electronic annotation /// 16301 // kinase activity // inferred from direct assay /// 5488 // binding // inferred from electronic annotation	---
232464_at	193.384	151.244	0.782092	-0.354589	0.00247885	TRIMP1	AF230412	tripartite motif-containing pseudogene 1	---	---	---	---
1559776_at	70.317	89.9454	1.27914	0.355177	0.00247949	---	H41167	CDNA FLJ36989 fis, clone BRACE2006753	---	---	---	---
1561532_at	114.026	100.098	0.877854	-0.187946	0.00248445	---	BC043434	CDNA clone IMAGE:5296188	---	---	---	---
211617_at	78.2579	66.2092	0.846039	-0.241204	0.00249339	ALDOAP2	M21191	aldolase A, fructose-bisphosphate pseudogene 2 /// aldolase A, fructose-bisphosphate pseudogene 2	---	---	---	---
1556919_at	70.7432	61.9688	0.875968	-0.19105	0.00249351	LEPR	BC035120	leptin receptor	6112 // energy reserve metabolism // traceable author statement /// 7166 // cell surface receptor linked signal transduction // traceable author statement /// 7275 // development // traceable author statement	5887 // integral to plasma membrane // not recorded /// 16020 // membrane // inferred from electronic annotation /// 16021 // integral to membrane // inferred from electronic annotation /// 5887 // integral to plasma membrane // non-traceable author statement	4896 // hematopoietin/interferon-class (D200-domain) cytokine receptor activity // inferred from electronic annotation /// 4872 // receptor activity // inferred from electronic annotation /// 4888 // transmembrane receptor activity // traceable author statement	---
207449_s_at	76.2416	67.4738	0.885	-0.176251	0.00250259	POFUT2	NM_015227	protein O-fucosyltransferase 2	5975 // carbohydrate metabolism // inferred from electronic annotation /// 6004 // fucose metabolism // inferred from electronic annotation	---	16757 // transferase activity, transferring glycosyl groups // inferred from electronic annotation /// 46922 // peptide-O-fucosyltransferase activity // inferred from electronic annotation /// 16740 // transferase activity // inferred from electronic annotation	---
235927_at	79.9138	70.9526	0.887864	-0.17159	0.00251741	---	BE350122	---	---	---	---	---
226967_at	752.122	627.065	0.833728	-0.262351	0.00252094	FLJ14768	BG231981	hypothetical protein FLJ14768	6350 // transcription // inferred from electronic annotation /// 6355 // regulation of transcription, DNA-dependent // inferred from electronic annotation	5634 // nucleus // inferred from sequence or structural similarity /// 5737 // cytoplasm // inferred from sequence or structural similarity /// 5634 // nucleus // inferred from electronic annotation	3676 // nucleic acid binding // inferred from electronic annotation /// 5102 // receptor binding // inferred from sequence or structural similarity /// 8270 // zinc ion binding // inferred from electronic annotation /// 19901 // protein kinase binding // inferred from sequence or structural similarity /// 46872 // metal ion binding // inferred from electronic annotation	---
216085_at	56.325	49.6571	0.881618	-0.181775	0.00253794	DKFZP434C153	AL080128	DKFZP434C153 protein	---	---	---	---
206186_at	97.1209	82.6126	0.850616	-0.233421	0.00253937	MPP3	NM_001932	membrane protein, palmitoylated 3 (MAGUK p55 subfamily member 3)	7165 // signal transduction // traceable author statement	5887 // integral to plasma membrane // traceable author statement /// 9986 // cell surface // inferred from expression pattern	4385 // guanylate kinase activity // traceable author statement /// 5515 // protein binding // inferred from electronic annotation	---
220732_at	117.961	99.2569	0.841438	-0.249071	0.00256583	DEPDC2	NM_025170	DEP domain containing 2	7186 // G-protein coupled receptor protein signaling pathway // inferred from direct assay /// 7242 // intracellular signaling cascade // inferred from electronic annotation /// 35023 // regulation of Rho protein signal transduction // inferred from electronic annotation	5622 // intracellular // inferred from electronic annotation /// 5856 // cytoskeleton // inferred from electronic annotation	30675 // Rac GTPase activator activity // inferred from direct assay /// 30676 // Rac guanyl-nucleotide exchange factor activity // inferred from direct assay /// 5085 // guanyl-nucleotide exchange factor activity // inferred from electronic annotation /// 5515 // protein binding // inferred from electronic annotation /// 5089 // Rho guanyl-nucleotide exchange factor activity // inferred from ele…	---
209001_s_at	856.781	775.901	0.9056	-0.143054	0.00258105	ANAPC13	BC005398	anaphase promoting complex subunit 13	---	---	---	---
244079_at	104.847	89.5006	0.853629	-0.228319	0.00260521	LOC442512	BF059617	similar to U2 small nuclear ribonucleoprotein A (U2 snRNP-A)	---	---	---	---
1570531_at	145.886	131.409	0.900767	-0.150774	0.00261237	KCNJ5	BC018531	Potassium inwardly-rectifying channel, subfamily J, member 5	6811 // ion transport // inferred from electronic annotation /// 6813 // potassium ion transport // traceable author statement /// 6810 // transport // inferred from electronic annotation /// 6813 // potassium ion transport // inferred from electronic annotation	8076 // voltage-gated potassium channel complex // traceable author statement /// 16020 // membrane // inferred from electronic annotation /// 16021 // integral to membrane // inferred from electronic annotation	5244 // voltage-gated ion channel activity // inferred from electronic annotation /// 5267 // potassium channel activity // inferred from electronic annotation /// 15273 // G-protein enhanced inward rectifier potassium channel activity // traceable author statement /// 15467 // G-protein activated inward rectifier potassium channel activity // inferred from electronic annotation /// 30955 // pota…	Calcium_regulation_in_cardiac_cells // GenMAPP
221187_s_at	149.037	134.406	0.901828	-0.149075	0.00262501	FLJ22688	NM_025129	hypothetical protein FLJ22688	---	---	---	---
219114_at	318.124	276.358	0.868714	-0.203048	0.00262634	C3orf18	NM_016210	chromosome 3 open reading frame 18	---	---	---	---
1554388_at	177.441	160.485	0.904443	-0.144899	0.00263922	VPS29	BC032462	vacuolar protein sorting 29 (yeast)	15031 // protein transport // inferred from electronic annotation /// 6810 // transport // inferred from electronic annotation	---	16787 // hydrolase activity // inferred from electronic annotation	---
1556722_a_at	132.754	115.774	0.8721	-0.197435	0.002643	FLJ33706	AK091025	hypothetical protein FLJ33706	---	---	---	---
243584_at	216.697	183.383	0.846263	-0.240822	0.00264533	PRSS23	AW976035	Protease, serine, 23	6508 // proteolysis // inferred from electronic annotation /// 7165 // signal transduction // inferred from electronic annotation /// 7186 // G-protein coupled receptor protein signaling pathway // inferred from electronic annotation	16020 // membrane // inferred from electronic annotation /// 16021 // integral to membrane // inferred from electronic annotation	4252 // serine-type endopeptidase activity // inferred from electronic annotation /// 8233 // peptidase activity // inferred from electronic annotation /// 16787 // hydrolase activity // inferred from electronic annotation /// 1584 // rhodopsin-like receptor activity // inferred from electronic annotation /// 4871 // signal transducer activity // inferred from electronic annotation /// 4872 // re…	---
234249_at	122.773	104.229	0.848955	-0.23624	0.00265535	---	AL157467	---	---	---	---	---
240769_at	73.6711	64.519	0.875771	-0.191375	0.00266598	---	AI733395	Transcribed locus	---	---	---	---
231643_s_at	83.7261	74.2389	0.886687	-0.173502	0.00267329	---	BE045541	Transcribed locus	---	---	---	---
218938_at	62.3771	73.2766	1.17473	0.232335	0.00267621	FBXL15	NM_024326	F-box and leucine-rich repeat protein 15	6512 // ubiquitin cycle // inferred from electronic annotation	---	---	---
1559820_at	278.306	240.48	0.864087	-0.210751	0.00267828	ATG10	BC018651	ATG10 autophagy related 10 homolog (S. cerevisiae)	6512 // ubiquitin cycle // inferred from electronic annotation /// 6914 // autophagy // inferred from electronic annotation /// 15031 // protein transport // inferred from electronic annotation /// 6810 // transport // inferred from electronic annotation	---	---	---
229854_at	1227.15	1051.58	0.856934	-0.222745	0.002679	OBSCN	AW614056	obscurin, cytoskeletal calmodulin and titin-interacting RhoGEF	7155 // cell adhesion // inferred from electronic annotation	16020 // membrane // inferred from electronic annotation	5515 // protein binding // inferred from electronic annotation	---
204706_at	302.925	263.941	0.871306	-0.198749	0.00268216	INPP5E	NM_019892	inositol polyphosphate-5-phosphatase, 72 kDa	6629 // lipid metabolism // inferred from electronic annotation	5795 // Golgi stack // inferred from electronic annotation	4439 // phosphoinositide 5-phosphatase activity // inferred from electronic annotation /// 4445 // inositol-polyphosphate 5-phosphatase activity // traceable author statement /// 16787 // hydrolase activity // inferred from electronic annotation /// 4437 // inositol or phosphatidylinositol phosphatase activity // inferred from electronic annotation	---
201224_s_at	613.501	485.63	0.791571	-0.337209	0.00268796	SRRM1	AU147713	serine/arginine repetitive matrix 1	398 // nuclear mRNA splicing, via spliceosome // inferred from electronic annotation /// 6397 // mRNA processing // inferred from electronic annotation	5634 // nucleus // inferred from electronic annotation	3677 // DNA binding // inferred from electronic annotation /// 3723 // RNA binding // inferred from electronic annotation	mRNA_processing_Reactome // GenMAPP
242380_at	83.4886	70.0873	0.839484	-0.252425	0.00269678	CCT8	AA283816	Chaperonin containing TCP1, subunit 8 (theta)	6457 // protein folding // inferred from electronic annotation /// 44267 // cellular protein metabolism // inferred from electronic annotation	5829 // cytosol // not recorded	166 // nucleotide binding // inferred from electronic annotation /// 5524 // ATP binding // inferred from electronic annotation /// 42623 // ATPase activity, coupled // traceable author statement /// 51082 // unfolded protein binding // inferred from electronic annotation /// 5515 // protein binding // inferred from electronic annotation	---
216774_at	101.898	87.9818	0.863431	-0.211848	0.00270109	---	AK025325	CDNA: FLJ21672 fis, clone COL09025	---	---	---	---
239987_at	111.362	98.608	0.88547	-0.175485	0.00270645	---	AV700714	Transcribed locus, moderately similar to XP_420095.1 PREDICTED: similar to protein disulfide-isomerase (EC 5.3.4.1) precursor - chicken [Gallus gallus]	---	---	---	---
243493_at	74.6881	64.8437	0.868193	-0.203913	0.00271734	---	T97977	Transcribed locus	---	---	---	---
215956_at	126.417	107.997	0.854286	-0.227209	0.00271778	RAB5A	AK022065	RAB5A, member RAS oncogene family	6897 // endocytosis // traceable author statement /// 7264 // small GTPase mediated signal transduction // inferred from electronic annotation /// 15031 // protein transport // inferred from electronic annotation /// 6810 // transport // inferred from electronic annotation	5769 // early endosome // inferred from direct assay /// 16020 // membrane // inferred from electronic annotation /// 5769 // early endosome // traceable author statement	166 // nucleotide binding // inferred from electronic annotation /// 3924 // GTPase activity // traceable author statement /// 5515 // protein binding // inferred from physical interaction /// 5515 // protein binding // non-traceable author statement /// 5525 // GTP binding // inferred from electronic annotation	---
1555922_at	250.421	214.416	0.856222	-0.223943	0.00271808	C10orf114	BQ007522	chromosome 10 open reading frame 114	---	---	---	---
233200_at	89.202	76.4377	0.856905	-0.222792	0.00273359	---	AF161364	---	---	---	---	---
220458_at	64.0578	51.8906	0.810059	-0.303902	0.00273714	FLJ10246	NM_018038	FLJ10246	---	---	---	---
243772_at	135.687	105.703	0.779021	-0.360266	0.00273859	SDCCAG8	BG531853	serologically defined colon cancer antigen 8	---	---	---	---
236712_at	62.3478	52.6946	0.845171	-0.242684	0.00274326	---	AI668706	Transcribed locus	---	---	---	---
1569516_at	79.6747	67.8109	0.851097	-0.232604	0.00274526	C6orf153	BM469250	Chromosome 6 open reading frame 153	---	---	---	---
1563062_at	105.271	84.9018	0.806503	-0.310247	0.00275228	---	BC042802	Homo sapiens, clone IMAGE:3891572, mRNA	---	---	---	---
1555078_at	224.787	192.171	0.854903	-0.226168	0.00275951	MGC46336	BC036762	hypothetical protein MGC46336	---	5634 // nucleus // inferred from electronic annotation	3676 // nucleic acid binding // inferred from electronic annotation /// 8270 // zinc ion binding // inferred from electronic annotation /// 46872 // metal ion binding // inferred from electronic annotation	---
234363_at	79.1124	70.1628	0.886874	-0.173199	0.00275958	OR6B1	AC004853	olfactory receptor, family 6, subfamily B, member 1	7165 // signal transduction // inferred from electronic annotation /// 7186 // G-protein coupled receptor protein signaling pathway // inferred from electronic annotation /// 7608 // sensory perception of smell // inferred from electronic annotation /// 50896 // response to stimulus // inferred from electronic annotation	16020 // membrane // inferred from electronic annotation /// 16021 // integral to membrane // inferred from electronic annotation	4872 // receptor activity // inferred from electronic annotation /// 4984 // olfactory receptor activity // inferred from electronic annotation	---
1569325_at	152.899	132.165	0.864395	-0.210238	0.00276854	ARPC5	BC034231	Actin related protein 2/3 complex, subunit 5, 16kDa	6928 // cell motility // traceable author statement /// 30036 // actin cytoskeleton organization and biogenesis // traceable author statement /// 30833 // regulation of actin filament polymerization // inferred from electronic annotation	5737 // cytoplasm // traceable author statement /// 5856 // cytoskeleton // inferred from electronic annotation /// 5885 // Arp2/3 protein complex // traceable author statement /// 15629 // actin cytoskeleton // traceable author statement	5200 // structural constituent of cytoskeleton // traceable author statement	---
1564028_s_at	119.197	99.4982	0.834738	-0.260604	0.00277039	FLJ40722	AK098041	hypothetical protein FLJ40722	6508 // proteolysis // inferred from electronic annotation	---	8237 // metallopeptidase activity // inferred from electronic annotation /// 8270 // zinc ion binding // inferred from electronic annotation	---
1566994_at	241.414	194.479	0.805583	-0.311894	0.00277332	---	AF454553	Clone GCRG114 mRNA sequence	---	---	---	---
1553313_s_at	129.923	98.2194	0.755979	-0.403581	0.00278284	SLC5A3	NM_006933	solute carrier family 5 (inositol transporters), member 3	6811 // ion transport // inferred from electronic annotation /// 6814 // sodium ion transport // inferred from electronic annotation	5887 // integral to plasma membrane // traceable author statement /// 16020 // membrane // inferred from electronic annotation	5215 // transporter activity // inferred from electronic annotation /// 5367 // myo-inositol:sodium symporter activity // traceable author statement /// 15293 // symporter activity // inferred from electronic annotation /// 31402 // sodium ion binding // inferred from electronic annotation	---
211661_x_at	140.876	128.34	0.911009	-0.134463	0.00278405	PTAFR	M80436	platelet-activating factor receptor /// platelet-activating factor receptor	6935 // chemotaxis // traceable author statement /// 6954 // inflammatory response // traceable author statement /// 7165 // signal transduction // inferred from electronic annotation /// 7186 // G-protein coupled receptor protein signaling pathway // inferred from mutant phenotype /// 19735 // antimicrobial humoral response (sensu Vertebrata) // traceable author statement /// 48015 // phosphoino…	5887 // integral to plasma membrane // traceable author statement /// 16020 // membrane // inferred from direct assay /// 16020 // membrane // inferred from electronic annotation /// 16021 // integral to membrane // inferred from electronic annotation /// 16021 // integral to membrane // non-traceable author statement	4872 // receptor activity // inferred from electronic annotation /// 4992 // platelet activating factor receptor activity // inferred from direct assay /// 5543 // phospholipid binding // inferred from direct assay /// 1584 // rhodopsin-like receptor activity // inferred from electronic annotation /// 4871 // signal transducer activity // inferred from electronic annotation /// 4930 // G-protein …	GPCRDB_Class_A_Rhodopsin-like // GenMAPP /// Small_ligand_GPCRs // GenMAPP
237293_at	131.54	111.872	0.850485	-0.233642	0.00278788	VMD2	AI808844	Vitelliform macular dystrophy 2 (Best disease, bestrophin)	6811 // ion transport // inferred from electronic annotation /// 7601 // visual perception // traceable author statement /// 50896 // response to stimulus // inferred from electronic annotation /// 6810 // transport // inferred from electronic annotation /// 7601 // visual perception // inferred from electronic annotation	5624 // membrane fraction // traceable author statement /// 16020 // membrane // inferred from electronic annotation /// 16021 // integral to membrane // traceable author statement /// 16323 // basolateral plasma membrane // inferred from direct assay /// 16021 // integral to membrane // inferred from electronic annotation	5216 // ion channel activity // inferred from electronic annotation /// 5509 // calcium ion binding // inferred from electronic annotation	---
239840_at	77.4943	65.7028	0.84784	-0.238136	0.00278961	---	BE327722	CDNA clone IMAGE:4814828	---	---	---	---
214148_at	156.729	132.668	0.846484	-0.240445	0.00279227	---	U90917	Clone 23641 mRNA sequence	---	---	---	---
244756_at	246.009	203.424	0.826895	-0.274224	0.00279537	ANKRD13D	AI885453	ankyrin repeat domain 13 family, member D	---	---	---	---
239379_at	130.05	116.792	0.898056	-0.155123	0.00279701	LRRFIP1	AW449624	Leucine rich repeat (in FLII) interacting protein 1	6357 // regulation of transcription from RNA polymerase II promoter // traceable author statement /// 16481 // negative regulation of transcription // non-traceable author statement	5634 // nucleus // non-traceable author statement /// 5634 // nucleus // traceable author statement /// 5737 // cytoplasm // traceable author statement /// 5856 // cytoskeleton // traceable author statement	3702 // RNA polymerase II transcription factor activity // not recorded /// 3725 // double-stranded RNA binding // traceable author statement /// 16564 // transcriptional repressor activity // non-traceable author statement	---
229208_at	146.33	120.109	0.82081	-0.28488	0.00279944	CEP27	AK022939	centrosomal protein 27kDa	---	5813 // centrosome // inferred from direct assay	---	---
1563563_at	110.341	98.5661	0.893283	-0.162811	0.0028028	CCDC40	AL713758	coiled-coil domain containing 40	6614 // SRP-dependent cotranslational protein targeting to membrane // inferred from electronic annotation	5786 // signal recognition particle (sensu Eukaryota) // inferred from electronic annotation	3723 // RNA binding // inferred from electronic annotation /// 5525 // GTP binding // inferred from electronic annotation	---
235826_at	80.7044	68.4231	0.847823	-0.238164	0.00280606	---	AI693281	MRNA; cDNA DKFZp564E202 (from clone DKFZp564E202) /// CDNA FLJ44257 fis, clone TKIDN2015263	---	---	---	---
222618_at	193.226	217.532	1.12579	0.17094	0.00281402	SMU1	AI611315	Smu-1 suppressor of mec-8 and unc-52 homolog (C. elegans)	---	---	---	---
1559746_a_at	92.2992	76.2841	0.826487	-0.274936	0.0028156	ZNF718	AK096662	zinc finger protein 718	6355 // regulation of transcription, DNA-dependent // inferred from electronic annotation	5634 // nucleus // inferred from electronic annotation /// 5622 // intracellular // inferred from electronic annotation	3676 // nucleic acid binding // inferred from electronic annotation /// 8270 // zinc ion binding // inferred from electronic annotation	---
213815_x_at	100.519	112.355	1.11775	0.160598	0.00281872	C19orf29	AI913329	chromosome 19 open reading frame 29	---	---	5515 // protein binding // inferred from physical interaction	---
1564336_at	73.4111	62.7746	0.85511	-0.225819	0.00282638	---	AK056734	CDNA FLJ32172 fis, clone PLACE6000555	---	---	---	---
221995_s_at	490.662	372.633	0.75945	-0.396974	0.00283003	---	BF195165	---	---	---	---	---
243964_at	117.882	94.3747	0.800587	-0.320869	0.00283312	---	AI631201	Transcribed locus	---	---	---	---
235669_at	99.4373	82.1638	0.826287	-0.275285	0.00283343	HNRPAB	BF000693	Heterogeneous nuclear ribonucleoprotein A/B	6381 // mRNA editing // traceable author statement	5634 // nucleus // inferred from electronic annotation	166 // nucleotide binding // inferred from electronic annotation /// 3724 // RNA helicase activity // not recorded /// 3729 // mRNA binding // traceable author statement /// 8483 // transaminase activity // inferred from electronic annotation /// 30170 // pyridoxal phosphate binding // inferred from electronic annotation	---
227484_at	60.5903	50.7193	0.837086	-0.256552	0.00283421	---	BF508615	CDNA FLJ41690 fis, clone HCASM2009405	---	---	---	---
224767_at	412.754	340.914	0.825951	-0.275872	0.00285012	RPL37	AL044126	Ribosomal protein L37	6412 // protein biosynthesis // inferred from electronic annotation	5622 // intracellular // inferred from electronic annotation /// 5840 // ribosome // inferred from electronic annotation /// 30529 // ribonucleoprotein complex // inferred from electronic annotation	3735 // structural constituent of ribosome // inferred from electronic annotation /// 8270 // zinc ion binding // inferred from electronic annotation /// 19843 // rRNA binding // inferred from electronic annotation /// 46872 // metal ion binding // inferred from electronic annotation /// 3723 // RNA binding // inferred from electronic annotation	Ribosomal_Proteins // GenMAPP /// Ribosomal_Proteins // GenMAPP
47608_at	274.116	251.293	0.916738	-0.125419	0.00285548	TJAP1	AI697401	tight junction associated protein 1 (peripheral)	---	5795 // Golgi stack // inferred from electronic annotation /// 5923 // tight junction // inferred from electronic annotation	5515 // protein binding // inferred from physical interaction	---
216589_at	51.5447	65.1947	1.26482	0.338931	0.00285561	LOC390998	AL031276	similar to 60S ribosomal protein L10 (QM protein) (Tumor suppressor QM) (Laminin receptor homolog)	---	---	---	---
235892_at	53.8356	41.9899	0.779966	-0.358517	0.00285885	---	AI620881	Transcribed locus, weakly similar to NP_060312.1 hypothetical protein FLJ20489 [Homo sapiens]	---	---	---	---
221980_at	260.534	199.237	0.764725	-0.386988	0.0028617	EMILIN2	AL117592	Elastin microfibril interfacer 2	7155 // cell adhesion // inferred from electronic annotation	5578 // extracellular matrix (sensu Metazoa) // inferred from electronic annotation /// 5576 // extracellular region // inferred from direct assay	5515 // protein binding // inferred from physical interaction /// 30023 // extracellular matrix constituent conferring elasticity // non-traceable author statement /// 5515 // protein binding // inferred from electronic annotation	---
244744_at	153.075	117.182	0.765518	-0.385492	0.00287377	---	AI368807	CDNA FLJ44884 fis, clone BRAMY2037609	---	---	---	---
227060_at	399.024	305.562	0.765774	-0.385009	0.00288202	TNFRSF19L	AW571669	tumor necrosis factor receptor superfamily, member 19-like	---	16020 // membrane // inferred from electronic annotation /// 16021 // integral to membrane // inferred from electronic annotation	4872 // receptor activity // inferred from electronic annotation	---
203832_at	212.25	250.242	1.179	0.23756	0.00289257	SNRPF	NM_003095	small nuclear ribonucleoprotein polypeptide F	398 // nuclear mRNA splicing, via spliceosome // inferred from electronic annotation /// 6096 // glycolysis // inferred from electronic annotation /// 6350 // transcription // inferred from electronic annotation /// 6355 // regulation of transcription, DNA-dependent // inferred from electronic annotation /// 6397 // mRNA processing // inferred from electronic annotation	5634 // nucleus // inferred from electronic annotation /// 5732 // small nucleolar ribonucleoprotein complex // inferred from electronic annotation /// 15 // phosphopyruvate hydratase complex // inferred from electronic annotation /// 30529 // ribonucleoprotein complex // inferred from electronic annotation	3723 // RNA binding // inferred from electronic annotation /// 287 // magnesium ion binding // inferred from electronic annotation /// 3677 // DNA binding // inferred from electronic annotation /// 4634 // phosphopyruvate hydratase activity // inferred from electronic annotation /// 8243 // plasminogen activator activity // inferred from electronic annotation /// 16829 // lyase activity // inferr…	Glycolysis_and_Gluconeogenesis // GenMAPP /// mRNA_processing_Reactome // GenMAPP /// mRNA_processing_binding_Reactome // GenMAPP
213556_at	141.231	120.055	0.850062	-0.23436	0.00290417	LOC390940	BE673445	similar to R28379_1	---	---	---	---
224084_at	131.323	103.889	0.7911	-0.338069	0.00291673	---	AF118077	---	---	---	---	---
211908_x_at	84.0641	72.148	0.85825	-0.220531	0.00292336	---	M87268	IgG heavy chain variable region (Vh26) /// IgG heavy chain variable region (Vh26)	---	---	---	---
220752_at	74.1692	60.0194	0.809223	-0.305391	0.0029401	LOC51145	NM_016158	erythrocyte transmembrane protein	---	16021 // integral to membrane // inferred from electronic annotation	---	---
241878_at	226.765	195.027	0.86004	-0.217524	0.00294964	MTHFD1L	R37691	Methylenetetrahydrofolate dehydrogenase (NADP+ dependent) 1-like	9396 // folic acid and derivative biosynthesis // inferred from electronic annotation	---	3824 // catalytic activity // inferred from electronic annotation /// 4329 // formate-tetrahydrofolate ligase activity // inferred from electronic annotation /// 5524 // ATP binding // inferred from electronic annotation /// 4488 // methylenetetrahydrofolate dehydrogenase (NADP+) activity // inferred from electronic annotation /// 16491 // oxidoreductase activity // inferred from electronic annot…	Glyoxylate and dicarboxylate metabolism // KEGG /// One carbon pool by folate // KEGG /// Glyoxylate and dicarboxylate metabolism // KEGG /// One carbon pool by folate // KEGG /// Glyoxylate and dicarboxylate metabolism // KEGG /// One carbon pool by folate // KEGG
201708_s_at	355.29	312.581	0.879794	-0.184763	0.00296118	NIPSNAP1	AW083371	nipsnap homolog 1 (C. elegans)	---	5739 // mitochondrion // inferred from sequence or structural similarity	---	---
204689_at	135.637	99.8776	0.736357	-0.441522	0.00296594	HHEX	NM_001529	homeobox, hematopoietically expressed	6355 // regulation of transcription, DNA-dependent // inferred from electronic annotation /// 7275 // development // traceable author statement /// 19735 // antimicrobial humoral response (sensu Vertebrata) // traceable author statement /// 7275 // development // inferred from electronic annotation /// 45449 // regulation of transcription // inferred from electronic annotation /// 6350 // transcr…	5634 // nucleus // inferred from electronic annotation /// 5634 // nucleus // not recorded	3700 // transcription factor activity // traceable author statement /// 43565 // sequence-specific DNA binding // inferred from electronic annotation /// 3677 // DNA binding // inferred from electronic annotation /// 3700 // transcription factor activity // inferred from electronic annotation /// 3677 // DNA binding // traceable author statement	---
228516_at	211.173	171.976	0.814381	-0.296223	0.00297847	CDAN1	AI122852	congenital dyserythropoietic anemia, type I	---	---	---	Cell_cycle_KEGG // GenMAPP
213784_at	94.3599	84.589	0.896451	-0.157704	0.00298663	RABL4	AL037167	RAB, member of RAS oncogene family-like 4	7264 // small GTPase mediated signal transduction // inferred from electronic annotation	---	166 // nucleotide binding // inferred from electronic annotation /// 5525 // GTP binding // inferred from electronic annotation	---
227208_at	300.14	249.607	0.831635	-0.265977	0.0029878	CCDC84	BF446390	coiled-coil domain containing 84	---	---	166 // nucleotide binding // inferred from electronic annotation /// 19843 // rRNA binding // inferred from electronic annotation	---
230662_at	137.052	113.542	0.828462	-0.271493	0.00299751	LOC644942 /// LOC649694	BG413584	similar to ring finger protein 187 /// similar to ring finger protein 187	---	---	---	---
234208_at	116.388	105.747	0.908569	-0.138332	0.00300025	ADAM19	AK025252	ADAM metallopeptidase domain 19 (meltrin beta)	6508 // proteolysis // inferred from electronic annotation	16020 // membrane // inferred from electronic annotation /// 16021 // integral to membrane // inferred from electronic annotation	4222 // metalloendopeptidase activity // inferred from electronic annotation /// 8270 // zinc ion binding // inferred from electronic annotation /// 46872 // metal ion binding // inferred from electronic annotation /// 8233 // peptidase activity // inferred from electronic annotation /// 8237 // metallopeptidase activity // inferred from electronic annotation /// 16787 // hydrolase activity // in…	---
218082_s_at	210.71	258.125	1.22503	0.292815	0.00300047	UBP1	NM_014517	upstream binding protein 1 (LBP-1a)	6357 // regulation of transcription from RNA polymerase II promoter // traceable author statement /// 16481 // negative regulation of transcription // traceable author statement /// 19079 // viral genome replication // traceable author statement	5634 // nucleus // traceable author statement	3700 // transcription factor activity // traceable author statement /// 3714 // transcription corepressor activity // traceable author statement /// 16566 // specific transcriptional repressor activity // traceable author statement /// 3677 // DNA binding // traceable author statement	---
1556923_at	76.169	65.4284	0.85899	-0.219286	0.00300083	ACOX1	AW051321	Acyl-Coenzyme A oxidase 1, palmitoyl	6118 // electron transport // inferred from electronic annotation /// 6629 // lipid metabolism // traceable author statement /// 6635 // fatty acid beta-oxidation // inferred from electronic annotation /// 6693 // prostaglandin metabolism // non-traceable author statement /// 6629 // lipid metabolism // inferred from electronic annotation /// 6631 // fatty acid metabolism // inferred from electro…	5777 // peroxisome // non-traceable author statement /// 5777 // peroxisome // inferred from electronic annotation /// 5777 // peroxisome // traceable author statement	3995 // acyl-CoA dehydrogenase activity // inferred from electronic annotation /// 3997 // acyl-CoA oxidase activity // non-traceable author statement /// 9053 // electron donor activity // not recorded /// 16491 // oxidoreductase activity // inferred from electronic annotation /// 50660 // FAD binding // inferred from electronic annotation /// 3997 // acyl-CoA oxidase activity // inferred from e…	Fatty acid metabolism // KEGG
218631_at	136.972	125.247	0.914401	-0.129101	0.003003	AVPI1	NM_021732	arginine vasopressin-induced 1	---	---	---	---
1562546_at	58.8676	44.0832	0.748854	-0.417243	0.00300592	LOC441920	AK094548	Similar to F-box only protein 25 isoform 2	---	---	---	---
234404_at	63.919	56.1888	0.879062	-0.185963	0.00300602	LOC152286	AL117431	Hypothetical protein LOC152286	---	---	---	---
226309_at	127.481	103.74	0.813771	-0.297305	0.00300843	C14orf168	AK026653	chromosome 14 open reading frame 168	---	---	---	---
206954_at	97.5619	87.2196	0.893992	-0.161666	0.00301099	WIT1	NM_015855	Wilms tumor upstream neighbor 1	8283 // cell proliferation // non-traceable author statement	---	---	---
207516_at	52.0878	37.5638	0.721163	-0.471603	0.00301712	CHRNB4	NM_000750	cholinergic receptor, nicotinic, beta 4	6811 // ion transport // inferred from electronic annotation /// 7165 // signal transduction // traceable author statement /// 7271 // synaptic transmission, cholinergic // traceable author statement /// 6810 // transport // inferred from electronic annotation /// 6810 // transport // traceable author statement	5892 // nicotinic acetylcholine-gated receptor-channel complex // traceable author statement /// 16021 // integral to membrane // inferred from electronic annotation /// 45211 // postsynaptic membrane // inferred from electronic annotation /// 16020 // membrane // inferred from electronic annotation	4889 // nicotinic acetylcholine-activated cation-selective channel activity // inferred from electronic annotation /// 5216 // ion channel activity // inferred from electronic annotation /// 5230 // extracellular ligand-gated ion channel activity // inferred from electronic annotation /// 15267 // channel or pore class transporter activity // traceable author statement /// 15464 // acetylcholine …	---
1570107_at	137.781	117.786	0.854882	-0.226203	0.0030175	---	BC029332	---	---	---	---	---
231476_at	165.195	145.943	0.88346	-0.178763	0.00302492	PEA15	AW138265	Phosphoprotein enriched in astrocytes 15	6810 // transport // traceable author statement /// 6916 // anti-apoptosis // inferred from direct assay /// 42981 // regulation of apoptosis // inferred from direct assay /// 42981 // regulation of apoptosis // inferred from electronic annotation /// 46325 // negative regulation of glucose import // inferred from direct assay /// 6810 // transport // inferred from electronic annotation /// 6915 …	5875 // microtubule associated complex // non-traceable author statement	5351 // sugar porter activity // inferred from electronic annotation /// 5515 // protein binding // inferred from electronic annotation /// 5515 // protein binding // inferred from physical interaction	Calcium_regulation_in_cardiac_cells // GenMAPP /// Calcium_regulation_in_cardiac_cells // GenMAPP /// Calcium_regulation_in_cardiac_cells // GenMAPP
1556387_at	78.971	65.6541	0.83137	-0.266438	0.00302514	---	AK096143	CDNA FLJ38824 fis, clone LIVER2008945	---	---	---	---
205143_at	131.841	93.4231	0.708606	-0.496944	0.00302967	CSPG3	NM_004386	chondroitin sulfate proteoglycan 3 (neurocan)	6928 // cell motility // not recorded /// 7155 // cell adhesion // inferred from electronic annotation	---	5509 // calcium ion binding // inferred from electronic annotation /// 5529 // sugar binding // inferred from electronic annotation /// 5540 // hyaluronic acid binding // inferred from electronic annotation	---
1555084_at	168.825	133.93	0.793303	-0.334056	0.00303463	---	BC011231	---	---	---	---	---
243280_at	126.281	113.074	0.895414	-0.159373	0.00303471	MAPK8	AW444619	Mitogen-activated protein kinase 8	6468 // protein amino acid phosphorylation // inferred from electronic annotation /// 6928 // cell motility // traceable author statement /// 6950 // response to stress // traceable author statement /// 7165 // signal transduction // traceable author statement /// 7254 // JNK cascade // inferred from direct assay	---	166 // nucleotide binding // inferred from electronic annotation /// 4674 // protein serine/threonine kinase activity // inferred from electronic annotation /// 4705 // JUN kinase activity // inferred from direct assay /// 4707 // MAP kinase activity // inferred from electronic annotation /// 5515 // protein binding // inferred from physical interaction /// 5524 // ATP binding // inferred from el…	---
212111_at	142.816	163.3	1.14343	0.193366	0.00303948	STX12	AA628051	syntaxin 12	6886 // intracellular protein transport // inferred from electronic annotation /// 6810 // transport // inferred from electronic annotation /// 15031 // protein transport // inferred from electronic annotation	5795 // Golgi stack // inferred from electronic annotation /// 16020 // membrane // inferred from electronic annotation /// 16021 // integral to membrane // inferred from electronic annotation	8565 // protein transporter activity // inferred from electronic annotation	---
230491_at	67.2237	55.6566	0.827931	-0.272418	0.00306382	---	BF111884	MRNA; cDNA DKFZp686J01116 (from clone DKFZp686J01116)	---	---	---	---
218367_x_at	152.169	169.786	1.11577	0.158042	0.00306618	USP21	NM_012475	ubiquitin specific peptidase 21	6511 // ubiquitin-dependent protein catabolism // inferred from electronic annotation /// 6512 // ubiquitin cycle // inferred from electronic annotation /// 6464 // protein modification // non-traceable author statement	---	4197 // cysteine-type endopeptidase activity // inferred from electronic annotation /// 4221 // ubiquitin thiolesterase activity // inferred from electronic annotation /// 4221 // ubiquitin thiolesterase activity // traceable author statement /// 5515 // protein binding // inferred from physical interaction /// 8233 // peptidase activity // inferred from electronic annotation /// 8234 // cysteine…	---
237515_at	176.188	257.583	1.46198	0.547923	0.00307164	TMEM56	AA054642	Transmembrane protein 56	---	16021 // integral to membrane // inferred from electronic annotation	---	---
241605_at	72.6672	59.153	0.814026	-0.296853	0.00307886	TRUB1	BE736287	TruB pseudouridine (psi) synthase homolog 1 (E. coli)	8033 // tRNA processing // inferred from electronic annotation /// 6396 // RNA processing // inferred from electronic annotation	---	4730 // pseudouridylate synthase activity // inferred from electronic annotation	---
235993_at	170.58	140.938	0.826228	-0.275388	0.00307973	---	T81639	---	---	---	---	---
232890_at	83.9232	64.5387	0.76902	-0.378906	0.00311101	C14orf135	AK021423	Chromosome 14 open reading frame 135	---	16021 // integral to membrane // inferred from electronic annotation	---	---
227139_s_at	61.3939	74.0684	1.20645	0.270764	0.00311316	HPS3	AA219354	Hermansky-Pudlak syndrome 3	---	---	---	---
214990_at	140.402	118.484	0.843891	-0.244871	0.00312723	PIGO	AC004472	Phosphatidylinositol glycan, class O	6506 // GPI anchor biosynthesis // inferred from sequence or structural similarity /// 9117 // nucleotide metabolism // inferred from electronic annotation	5789 // endoplasmic reticulum membrane // inferred from sequence or structural similarity /// 16020 // membrane // inferred from electronic annotation /// 16021 // integral to membrane // inferred from electronic annotation /// 5783 // endoplasmic reticulum // inferred from electronic annotation	16787 // hydrolase activity // inferred from electronic annotation	---
226794_at	62.7862	74.6008	1.18817	0.248743	0.00312971	STXBP5	AI825998	syntaxin binding protein 5 (tomosyn)	15031 // protein transport // inferred from electronic annotation /// 16192 // vesicle-mediated transport // inferred from electronic annotation /// 6810 // transport // inferred from electronic annotation	16020 // membrane // inferred from electronic annotation /// 16021 // integral to membrane // inferred from electronic annotation	---	---
229887_at	185.336	161.19	0.869719	-0.201379	0.00312998	ALS2CL	AI672049	ALS2 C-terminal like	---	---	---	---
237372_at	247.565	200.385	0.809426	-0.305029	0.00314004	PSG9	N30169	Pregnancy specific beta-1-glycoprotein 9	6952 // defense response // non-traceable author statement /// 7565 // pregnancy // inferred from electronic annotation /// 7565 // pregnancy // traceable author statement /// 7565 // pregnancy // non-traceable author statement /// 16477 // cell migration // non-traceable author statement	5576 // extracellular region // non-traceable author statement /// 5576 // extracellular region // not recorded /// 5624 // membrane fraction // traceable author statement /// 16020 // membrane // inferred from electronic annotation /// 16021 // integral to membrane // inferred from electronic annotation /// 5615 // extracellular space // not recorded	---	---
210038_at	1209.53	928.785	0.767888	-0.381031	0.00314028	PRKCQ	AL137145	protein kinase C, theta	1558 // regulation of cell growth // non-traceable author statement /// 6468 // protein amino acid phosphorylation // inferred from electronic annotation /// 6468 // protein amino acid phosphorylation // non-traceable author statement /// 7242 // intracellular signaling cascade // inferred from electronic annotation /// 7242 // intracellular signaling cascade // non-traceable author statement ///…	5622 // intracellular // non-traceable author statement	166 // nucleotide binding // inferred from electronic annotation /// 287 // magnesium ion binding // inferred from electronic annotation /// 4674 // protein serine/threonine kinase activity // inferred from electronic annotation /// 4674 // protein serine/threonine kinase activity // non-traceable author statement /// 5515 // protein binding // inferred from physical interaction /// 5524 // ATP b…	G_Protein_Signaling // GenMAPP /// Wnt_signaling // GenMAPP /// Calcium_regulation_in_cardiac_cells // GenMAPP /// Smooth_muscle_contraction // GenMAPP
1561642_at	106.779	88.9918	0.833424	-0.262878	0.00314972	PHACTR1	AF085859	Phosphatase and actin regulator 1	---	---	3779 // actin binding // inferred from electronic annotation /// 4864 // protein phosphatase inhibitor activity // inferred from electronic annotation	---
227839_at	107.292	90.9946	0.848103	-0.237689	0.0031587	MBD5	AI911379	methyl-CpG binding domain protein 5	---	5634 // nucleus // inferred from electronic annotation	3677 // DNA binding // inferred from electronic annotation	---
242736_at	81.8836	67.2222	0.820949	-0.284636	0.00316359	SORBS1	AI377221	Sorbin and SH3 domain containing 1	6810 // transport // inferred from electronic annotation /// 8286 // insulin receptor signaling pathway // inferred from sequence or structural similarity /// 15758 // glucose transport // inferred from sequence or structural similarity /// 43149 // stress fiber formation // inferred from sequence or structural similarity /// 48041 // focal adhesion formation // inferred from sequence or structur…	1725 // stress fiber // inferred from sequence or structural similarity /// 5634 // nucleus // inferred from direct assay /// 5915 // zonula adherens // traceable author statement /// 5924 // cell-substrate adherens junction // inferred from sequence or structural similarity /// 16020 // membrane // inferred from electronic annotation /// 45121 // lipid raft // inferred from sequence or structura…	3779 // actin binding // traceable author statement /// 5158 // insulin receptor binding // inferred from direct assay /// 5515 // protein binding // inferred from physical interaction /// 5515 // protein binding // inferred from sequence or structural similarity /// 8092 // cytoskeletal protein binding // traceable author statement	Integrin-mediated_cell_adhesion_KEGG // GenMAPP
1562476_at	146.758	110.572	0.753433	-0.408449	0.00317418	---	AL833420	MRNA; cDNA DKFZp313C2339 (from clone DKFZp313C2339)	---	---	---	---
1554601_at	51.0001	41.1443	0.80675	-0.309807	0.00319395	TCBA1	AB070452	T-cell lymphoma breakpoint associated target 1	---	---	---	---
210915_x_at	93.3991	77.784	0.832813	-0.263935	0.0032051	TRBV19 /// TRBC1	M15564	T cell receptor beta variable 19 /// T cell receptor beta constant 1	6955 // immune response // non-traceable author statement	16020 // membrane // inferred from electronic annotation /// 16021 // integral to membrane // inferred from electronic annotation /// 16020 // membrane // non-traceable author statement /// 5886 // plasma membrane // non-traceable author statement	4872 // receptor activity // inferred from electronic annotation /// 42287 // MHC protein binding // non-traceable author statement /// 42605 // peptide antigen binding // non-traceable author statement	---
1566779_at	86.7407	75.5957	0.871514	-0.198405	0.00320849	PRRG1	AL359566	Proline rich Gla (G-carboxyglutamic acid) 1	---	5576 // extracellular region // inferred from electronic annotation /// 5887 // integral to plasma membrane // traceable author statement /// 16020 // membrane // inferred from electronic annotation /// 16021 // integral to membrane // inferred from electronic annotation	5509 // calcium ion binding // inferred from electronic annotation	---
1557016_a_at	116.492	99.8536	0.857173	-0.222342	0.00321283	C1orf177	BC039109	chromosome 1 open reading frame 177	---	---	---	---
214070_s_at	138.153	121.35	0.878373	-0.187094	0.00321862	ATP10B	AW006935	ATPase, Class V, type 10B	6812 // cation transport // inferred from electronic annotation	16020 // membrane // inferred from electronic annotation /// 16021 // integral to membrane // inferred from electronic annotation	166 // nucleotide binding // inferred from electronic annotation /// 287 // magnesium ion binding // inferred from electronic annotation /// 4012 // phospholipid-translocating ATPase activity // inferred from electronic annotation /// 5524 // ATP binding // inferred from electronic annotation /// 16787 // hydrolase activity // inferred from electronic annotation /// 16887 // ATPase activity // in…	---
224742_at	169.686	149.025	0.878241	-0.187312	0.00321978	ABHD12	BF570412	abhydrolase domain containing 12	---	---	3824 // catalytic activity // inferred from electronic annotation	---
1559471_s_at	65.4356	55.745	0.851907	-0.231232	0.00322405	D21S2088E	AY063451	D21S2088E	---	---	---	---
242541_at	54.0383	46.4498	0.859571	-0.218311	0.00323577	ABCA9	AV692159	ATP-binding cassette, sub-family A (ABC1), member 9	---	---	166 // nucleotide binding // inferred from electronic annotation /// 5524 // ATP binding // inferred from electronic annotation /// 16887 // ATPase activity // inferred from electronic annotation /// 17111 // nucleoside-triphosphatase activity // inferred from electronic annotation	---
235981_at	5898.79	3729.65	0.632274	-0.661379	0.00324301	C8orf22	N70563	chromosome 8 open reading frame 22	---	---	---	---
204923_at	101.407	87.4896	0.862753	-0.212981	0.00329444	CXorf9	AL023653	chromosome X open reading frame 9	---	---	---	---
238952_x_at	102.731	83.9802	0.817474	-0.290755	0.00330249	DKFZp779O175	BF439163	hypothetical protein DKFZp779O175	6355 // regulation of transcription, DNA-dependent // inferred from electronic annotation	5622 // intracellular // inferred from electronic annotation /// 5634 // nucleus // inferred from electronic annotation	3676 // nucleic acid binding // inferred from electronic annotation /// 8270 // zinc ion binding // inferred from electronic annotation /// 46872 // metal ion binding // inferred from electronic annotation	---
235347_at	95.0999	111.537	1.17284	0.230005	0.00330977	IQCG	BF435591	IQ motif containing G	---	---	---	---
216991_at	67.0643	56.1494	0.837247	-0.256274	0.00332905	ZNF224	BC002889	zinc finger protein 224	6350 // transcription // inferred from electronic annotation /// 6355 // regulation of transcription, DNA-dependent // inferred from electronic annotation	5634 // nucleus // inferred from electronic annotation	3677 // DNA binding // inferred from electronic annotation /// 8270 // zinc ion binding // inferred from electronic annotation /// 46872 // metal ion binding // inferred from electronic annotation	---
237313_at	63.5888	49.6753	0.781197	-0.356243	0.0033352	C1QTNF1	BE856800	C1q and tumor necrosis factor related protein 1	6817 // phosphate transport // inferred from electronic annotation	5737 // cytoplasm // inferred from electronic annotation	---	---
209102_s_at	504.069	401.732	0.796978	-0.327388	0.00333925	HBP1	AF019214	HMG-box transcription factor 1	6350 // transcription // inferred from electronic annotation /// 6355 // regulation of transcription, DNA-dependent // inferred from electronic annotation /// 7050 // cell cycle arrest // non-traceable author statement /// 16055 // Wnt receptor signaling pathway // inferred from electronic annotation	5634 // nucleus // inferred from electronic annotation	3677 // DNA binding // inferred from electronic annotation	---
1556796_at	79.2103	65.4802	0.826663	-0.274629	0.00334231	---	AW187990	CDNA FLJ32776 fis, clone TESTI2002048	---	---	---	---
229322_at	353.407	405.488	1.14737	0.198331	0.00334315	PPP2R5E	BF529715	protein phosphatase 2, regulatory subunit B (B56), epsilon isoform	7165 // signal transduction // inferred from electronic annotation	159 // protein phosphatase type 2A complex // inferred from electronic annotation /// 5737 // cytoplasm // traceable author statement	8601 // protein phosphatase type 2A regulator activity // inferred from electronic annotation /// 8601 // protein phosphatase type 2A regulator activity // traceable author statement	Wnt_signaling // GenMAPP /// Glycogen_Metabolism // GenMAPP /// Wnt_signaling // GenMAPP /// Glycogen_Metabolism // GenMAPP
224031_at	59.1423	49.1336	0.830768	-0.267483	0.00334793	STK17A	AF221846	serine/threonine kinase 17a (apoptosis-inducing)	6468 // protein amino acid phosphorylation // inferred from direct assay /// 6915 // apoptosis // inferred from electronic annotation /// 6917 // induction of apoptosis // inferred from mutant phenotype /// 7243 // protein kinase cascade // inferred from direct assay /// 6468 // protein amino acid phosphorylation // inferred from electronic annotation	5634 // nucleus // inferred from expression pattern /// 5634 // nucleus // inferred from electronic annotation	166 // nucleotide binding // inferred from electronic annotation /// 4674 // protein serine/threonine kinase activity // inferred from direct assay /// 5524 // ATP binding // inferred from direct assay /// 16740 // transferase activity // inferred from electronic annotation /// 4672 // protein kinase activity // inferred from electronic annotation /// 4674 // protein serine/threonine kinase activ…	mTOR signaling pathway // KEGG /// Wnt signaling pathway // KEGG /// Dorso-ventral axis formation // KEGG /// Hedgehog signaling pathway // KEGG /// TGF-beta signaling pathway // KEGG /// Axon guidance // KEGG /// VEGF signaling pathway // KEGG /// Focal adhesion // KEGG /// Adherens junction // KEGG /// Tight junction // KEGG /// Gap junction // KEGG /// B cell receptor signaling pathway // KEGG…
244334_at	74.7582	56.4762	0.755452	-0.404589	0.00334923	TRAM1L1	AA169554	translocation associated membrane protein 1-like 1	---	16021 // integral to membrane // inferred from electronic annotation	---	---
243776_at	69.2901	57.5533	0.830614	-0.26775	0.00335676	---	AW139582	---	---	---	---	---
223373_s_at	733.253	616.042	0.840149	-0.251283	0.00335895	PLA2G12A	AF306567	phospholipase A2, group XIIA	16042 // lipid catabolism // inferred from electronic annotation	5576 // extracellular region // non-traceable author statement /// 5576 // extracellular region // inferred from electronic annotation	5509 // calcium ion binding // inferred from electronic annotation /// 16787 // hydrolase activity // inferred from electronic annotation /// 47498 // calcium-dependent phospholipase A2 activity // non-traceable author statement /// 4623 // phospholipase A2 activity // inferred from electronic annotation /// 46872 // metal ion binding // inferred from electronic annotation	---
232835_at	252.699	183.667	0.72682	-0.460329	0.00336308	JARID2	AA533080	Jumonji, AT rich interactive domain 2	6350 // transcription // inferred from electronic annotation /// 6355 // regulation of transcription, DNA-dependent // inferred from electronic annotation /// 7275 // development // inferred from electronic annotation /// 7417 // central nervous system development // traceable author statement	5634 // nucleus // inferred from electronic annotation /// 5622 // intracellular // inferred from electronic annotation	3677 // DNA binding // inferred from electronic annotation	---
1552621_at	529.59	409.314	0.772888	-0.371668	0.00336651	POLR2J2	BQ613856	DNA directed RNA polymerase II polypeptide J-related gene	6350 // transcription // inferred from electronic annotation /// 7242 // intracellular signaling cascade // inferred from electronic annotation /// 6366 // transcription from RNA polymerase II promoter // traceable author statement	5634 // nucleus // inferred from electronic annotation /// 5665 // DNA-directed RNA polymerase II, core complex // traceable author statement	3677 // DNA binding // inferred from electronic annotation /// 3899 // DNA-directed RNA polymerase activity // inferred from electronic annotation /// 46983 // protein dimerization activity // inferred from electronic annotation /// 5096 // GTPase activator activity // inferred from direct assay /// 5096 // GTPase activator activity // inferred from electronic annotation /// 8270 // zinc ion bind…	RNA_transcription_Reactome // GenMAPP /// RNA_transcription_Reactome // GenMAPP
229114_at	206.844	141.606	0.684602	-0.546662	0.00337023	---	AW237741	CDNA clone IMAGE:4801326	---	---	---	---
1553928_at	100.056	76.0381	0.759952	-0.396019	0.00337095	ELMOD2	NM_153702	ELMO/CED-12 domain containing 2	6909 // phagocytosis // inferred from electronic annotation /// 6915 // apoptosis // inferred from electronic annotation	5856 // cytoskeleton // inferred from electronic annotation	---	---
221184_at	121.506	98.1404	0.807698	-0.308112	0.00337442	---	NM_025089	---	---	---	---	---
1562332_at	143.872	114.342	0.794747	-0.331433	0.00337833	---	BC041966	CDNA clone IMAGE:5302406	---	---	---	---
1557286_at	130.084	98.4284	0.756656	-0.402291	0.00337939	---	AK001007	CDNA FLJ10145 fis, clone HEMBA1003322	---	---	---	---
227715_at	461.031	385.733	0.836676	-0.25726	0.00338165	LOC389830 /// LOC389833 /// LOC642282 /// LOC653071	AL562298	similar to Tektin-3 /// similar to hypothetical protein MGC27019 /// similar to Tektin-3 /// similar to CG32820-PA, isoform A	226 // microtubule cytoskeleton organization and biogenesis // inferred from electronic annotation	5874 // microtubule // inferred from electronic annotation	---	---
237375_at	66.5481	55.5628	0.834926	-0.260279	0.00339423	---	AI768860	---	---	---	---	---
213390_at	551.29	445.969	0.808956	-0.305867	0.00340605	C19orf7	AB028987	chromosome 19 open reading frame 7	---	---	3676 // nucleic acid binding // inferred from electronic annotation /// 8270 // zinc ion binding // inferred from electronic annotation	---
226564_at	328.885	274.742	0.835372	-0.259508	0.0034193	ZNF406 /// LOC654252	BF941325	zinc finger protein 406 /// similar to Zinc finger protein 406	6350 // transcription // inferred from electronic annotation /// 6355 // regulation of transcription, DNA-dependent // inferred from electronic annotation	5634 // nucleus // inferred from electronic annotation	3676 // nucleic acid binding // inferred from electronic annotation /// 3677 // DNA binding // inferred from electronic annotation /// 8270 // zinc ion binding // inferred from electronic annotation /// 46872 // metal ion binding // inferred from electronic annotation	---
237510_at	53.154	46.5106	0.875015	-0.19262	0.00342516	---	AI939472	---	---	---	---	---
209726_at	91.1739	82.5606	0.905529	-0.143168	0.00343368	CA11	AB018195	carbonic anhydrase XI	6730 // one-carbon compound metabolism // inferred from electronic annotation	---	4089 // carbonate dehydratase activity // traceable author statement /// 8270 // zinc ion binding // inferred from electronic annotation /// 4089 // carbonate dehydratase activity // inferred from electronic annotation	---
1494_f_at	209.569	176.348	0.841482	-0.248996	0.00343484	CYP2A6	M33318	cytochrome P450, family 2, subfamily A, polypeptide 6	6118 // electron transport // inferred from electronic annotation	5783 // endoplasmic reticulum // inferred from electronic annotation /// 5792 // microsome // traceable author statement /// 16020 // membrane // inferred from electronic annotation /// 5792 // microsome // inferred from electronic annotation	5506 // iron ion binding // inferred from electronic annotation /// 8389 // coumarin 7-hydroxylase activity // traceable author statement /// 19825 // oxygen binding // traceable author statement /// 20037 // heme binding // inferred from electronic annotation /// 46872 // metal ion binding // inferred from electronic annotation /// 50381 // unspecific monooxygenase activity // inferred from elec…	Fatty acid metabolism // KEGG /// gamma-Hexachlorocyclohexane degradation // KEGG /// Tryptophan metabolism // KEGG /// Arachidonic acid metabolism // KEGG /// Linoleic acid metabolism // KEGG /// Metabolism of xenobiotics by cytochrome P450 // KEGG
227116_at	62.359	73.3353	1.17602	0.233911	0.0034388	---	AI934828	Transcribed locus	---	---	---	---
212137_at	864.272	1014.91	1.17429	0.231794	0.00343984	LARP1	AV746402	La ribonucleoprotein domain family, member 1	---	---	3723 // RNA binding // inferred from electronic annotation	---
213367_at	195.949	159.095	0.811923	-0.300586	0.00344529	LOC155060	AF035281	hypothetical protein LOC155060	6355 // regulation of transcription, DNA-dependent // inferred from electronic annotation	5622 // intracellular // inferred from electronic annotation	3676 // nucleic acid binding // inferred from electronic annotation	---
235634_at	66.7053	57.1802	0.857206	-0.222286	0.00344912	PURG	BE503391	purine-rich element binding protein G	---	---	---	---
1566537_at	130.714	97.7789	0.748036	-0.41882	0.00345778	---	AK091055	CDNA FLJ33736 fis, clone BRAWH2018514	---	---	---	---
224103_at	92.6613	84.0578	0.907151	-0.140586	0.00345884	---	AF130044	Clone FLB1825 PRO0419	---	---	---	---
215084_s_at	88.8763	96.7257	1.08832	0.122099	0.0034638	LRRC42	AL031427	leucine rich repeat containing 42	---	---	---	---
233639_at	166.663	138.716	0.832314	-0.2648	0.00346411	POMGNT1	AK026430	protein O-linked mannose beta1,2-N-acetylglucosaminyltransferase	6487 // protein amino acid N-linked glycosylation // inferred from electronic annotation	139 // Golgi membrane // inferred from electronic annotation /// 5795 // Golgi stack // inferred from electronic annotation /// 16020 // membrane // inferred from electronic annotation /// 16021 // integral to membrane // inferred from electronic annotation	3827 // alpha-1,3-mannosylglycoprotein 2-beta-N-acetylglucosaminyltransferase activity // inferred from electronic annotation /// 16757 // transferase activity, transferring glycosyl groups // inferred from electronic annotation /// 30145 // manganese ion binding // inferred from electronic annotation /// 16740 // transferase activity // inferred from electronic annotation	---
231649_at	151.192	129.263	0.854955	-0.226079	0.0034668	DCHS1	BF509128	Dachsous 1 (Drosophila)	7155 // cell adhesion // inferred from electronic annotation /// 7156 // homophilic cell adhesion // inferred from electronic annotation /// 16339 // calcium-dependent cell-cell adhesion // non-traceable author statement	16020 // membrane // non-traceable author statement /// 16021 // integral to membrane // inferred from electronic annotation /// 16020 // membrane // inferred from electronic annotation	5509 // calcium ion binding // inferred from electronic annotation /// 5515 // protein binding // inferred from electronic annotation	---
1566268_at	106.843	89.2789	0.835606	-0.259106	0.00349024	---	H58743	Full length insert cDNA YR25G06	---	---	---	---
1552450_a_at	130.252	114.096	0.875964	-0.191057	0.00349308	DNAJC5G	NM_173650	DnaJ (Hsp40) homolog, subfamily C, member 5 gamma	6457 // protein folding // inferred from electronic annotation	16020 // membrane // inferred from electronic annotation	31072 // heat shock protein binding // inferred from electronic annotation /// 51082 // unfolded protein binding // inferred from electronic annotation	---
1556352_at	131.196	110.748	0.84414	-0.244445	0.00349598	---	AI692624	CDNA FLJ30440 fis, clone BRACE2009185	---	---	---	---
208399_s_at	69.0948	60.8346	0.880451	-0.183686	0.0034984	EDN3	NM_000114	endothelin 3	7165 // signal transduction // traceable author statement /// 7267 // cell-cell signaling // traceable author statement /// 7605 // sensory perception of sound // inferred from electronic annotation /// 9405 // pathogenesis // inferred from electronic annotation /// 9653 // morphogenesis // not recorded /// 19229 // regulation of vasoconstriction // inferred from electronic annotation /// 42310 /…	5576 // extracellular region // inferred from electronic annotation /// 5625 // soluble fraction // traceable author statement	5102 // receptor binding // traceable author statement	---
217920_at	97.2688	80.8204	0.830898	-0.267257	0.00350824	MAN1A2	H97940	mannosidase, alpha, class 1A, member 2	5975 // carbohydrate metabolism // inferred from electronic annotation /// 6487 // protein amino acid N-linked glycosylation // inferred from electronic annotation /// 6491 // N-glycan processing // traceable author statement	5624 // membrane fraction // traceable author statement /// 5795 // Golgi stack // inferred from electronic annotation /// 16020 // membrane // inferred from electronic annotation /// 16021 // integral to membrane // traceable author statement /// 16021 // integral to membrane // inferred from electronic annotation	4571 // mannosyl-oligosaccharide 1,2-alpha-mannosidase activity // inferred from electronic annotation /// 4571 // mannosyl-oligosaccharide 1,2-alpha-mannosidase activity // traceable author statement /// 5509 // calcium ion binding // inferred from electronic annotation /// 16798 // hydrolase activity, acting on glycosyl bonds // inferred from electronic annotation /// 16787 // hydrolase activit…	---
242876_at	125.848	99.7779	0.792843	-0.334893	0.00351572	AKT3	AW665358	V-akt murine thymoma viral oncogene homolog 3 (protein kinase B, gamma)	6468 // protein amino acid phosphorylation // traceable author statement /// 7165 // signal transduction // traceable author statement /// 6468 // protein amino acid phosphorylation // inferred from electronic annotation	---	166 // nucleotide binding // inferred from electronic annotation /// 4674 // protein serine/threonine kinase activity // inferred from electronic annotation /// 5515 // protein binding // inferred from physical interaction /// 5524 // ATP binding // inferred from electronic annotation /// 16740 // transferase activity // inferred from electronic annotation /// 4672 // protein kinase activity // i…	Integrin-mediated_cell_adhesion_KEGG // GenMAPP /// S1P_Signaling // GenMAPP
228131_at	445.102	326.43	0.733383	-0.44736	0.00353178	ERCC1	BG111047	Excision repair cross-complementing rodent repair deficiency, complementation group 1 (includes overlapping antisense sequence)	6281 // DNA repair // inferred from electronic annotation /// 6289 // nucleotide-excision repair // inferred from direct assay /// 6974 // response to DNA damage stimulus // inferred from electronic annotation	109 // nucleotide-excision repair complex // inferred from direct assay /// 5634 // nucleus // inferred from electronic annotation /// 5622 // intracellular // inferred from electronic annotation	3684 // damaged DNA binding // inferred from electronic annotation /// 4519 // endonuclease activity // inferred from electronic annotation /// 16787 // hydrolase activity // inferred from electronic annotation /// 3677 // DNA binding // inferred from electronic annotation /// 4518 // nuclease activity // inferred from electronic annotation	---
1570627_at	108.399	88.0591	0.812364	-0.299801	0.003539	TCEB3	BC019949	transcription elongation factor B (SIII), polypeptide 3 (110kDa, elongin A)	6357 // regulation of transcription from RNA polymerase II promoter // traceable author statement /// 6952 // defense response // inferred from electronic annotation	5634 // nucleus // inferred from electronic annotation /// 16021 // integral to membrane // inferred from electronic annotation	3711 // transcriptional elongation regulator activity // not recorded /// 5515 // protein binding // traceable author statement	---
205325_at	76.8438	69.0224	0.898218	-0.154863	0.0035393	PHYHIP	NM_014759	phytanoyl-CoA 2-hydroxylase interacting protein	---	---	---	---
219510_at	102.071	84.3606	0.826493	-0.274926	0.00354811	POLQ	NM_006596	polymerase (DNA directed), theta	6260 // DNA replication // inferred from electronic annotation /// 6281 // DNA repair // traceable author statement /// 6281 // DNA repair // inferred from electronic annotation /// 6974 // response to DNA damage stimulus // inferred from electronic annotation	5654 // nucleoplasm // traceable author statement	166 // nucleotide binding // inferred from electronic annotation /// 3684 // damaged DNA binding // traceable author statement /// 3887 // DNA-directed DNA polymerase activity // traceable author statement /// 5524 // ATP binding // inferred from electronic annotation /// 16740 // transferase activity // inferred from electronic annotation /// 3677 // DNA binding // inferred from electronic annot…	Purine metabolism // KEGG /// Pyrimidine metabolism // KEGG /// DNA polymerase // KEGG
1565882_at	148.526	124.885	0.840825	-0.250123	0.00355423	GRLF1	AK022126	Glucocorticoid receptor DNA binding factor 1	6350 // transcription // traceable author statement /// 6355 // regulation of transcription, DNA-dependent // inferred from electronic annotation /// 7049 // cell cycle // inferred from electronic annotation /// 7264 // small GTPase mediated signal transduction // inferred from electronic annotation /// 16481 // negative regulation of transcription // inferred from direct assay /// 42478 // regul…	5634 // nucleus // Unknown /// 5634 // nucleus // inferred from electronic annotation	3677 // DNA binding // traceable author statement /// 3714 // transcription corepressor activity // traceable author statement /// 5096 // GTPase activator activity // inferred from electronic annotation /// 5525 // GTP binding // inferred from electronic annotation /// 16564 // transcriptional repressor activity // inferred from direct assay /// 3677 // DNA binding // inferred from electronic an…	---
241982_at	122.989	100.245	0.815075	-0.294995	0.00356371	TAF1	AI939493	TAF1 RNA polymerase II, TATA box binding protein (TBP)-associated factor, 250kDa	80 // G1 phase of mitotic cell cycle // traceable author statement /// 6350 // transcription // inferred from electronic annotation /// 6352 // transcription initiation // inferred from electronic annotation /// 6355 // regulation of transcription, DNA-dependent // inferred from electronic annotation /// 7049 // cell cycle // inferred from electronic annotation /// 46777 // protein amino acid aut…	5634 // nucleus // traceable author statement /// 5669 // transcription factor TFIID complex // traceable author statement /// 5669 // transcription factor TFIID complex // inferred from direct assay /// 5634 // nucleus // inferred from electronic annotation /// 5669 // transcription factor TFIID complex // inferred from electronic annotation	166 // nucleotide binding // inferred from electronic annotation /// 3677 // DNA binding // inferred from electronic annotation /// 4402 // histone acetyltransferase activity // inferred from direct assay /// 4674 // protein serine/threonine kinase activity // inferred from direct assay /// 5515 // protein binding // inferred from physical interaction /// 5524 // ATP binding // inferred from elec…	---
1560071_a_at	75.5654	59.7136	0.790223	-0.339668	0.0035678	---	T94585	---	---	---	---	---
1562634_at	83.9447	66.0273	0.786558	-0.346375	0.00356993	---	BC043533	Homo sapiens, clone IMAGE:5169164, mRNA	---	---	---	---
239088_at	177.588	158.067	0.89008	-0.167993	0.00357468	---	AI142078	Transcribed locus	---	---	---	---
217291_at	96.5437	84.8423	0.878798	-0.186397	0.0035778	---	Z21818	---	---	---	---	---
229768_at	75.2361	64.992	0.863841	-0.211163	0.00358282	OR51E1	AI694767	olfactory receptor, family 51, subfamily E, member 1	7165 // signal transduction // inferred from electronic annotation /// 7186 // G-protein coupled receptor protein signaling pathway // inferred from electronic annotation /// 7608 // sensory perception of smell // inferred from electronic annotation /// 50896 // response to stimulus // inferred from electronic annotation	16020 // membrane // inferred from electronic annotation /// 16021 // integral to membrane // inferred from electronic annotation	4872 // receptor activity // inferred from electronic annotation /// 4984 // olfactory receptor activity // inferred from electronic annotation /// 1584 // rhodopsin-like receptor activity // inferred from electronic annotation /// 4871 // signal transducer activity // inferred from electronic annotation /// 4930 // G-protein coupled receptor activity // inferred from electronic annotation	---
1554646_at	177.876	146.67	0.824564	-0.278296	0.00358391	OSBPL1A	BC041563	oxysterol binding protein-like 1A	6869 // lipid transport // inferred from electronic annotation /// 8202 // steroid metabolism // inferred from electronic annotation /// 8203 // cholesterol metabolism // non-traceable author statement /// 16192 // vesicle-mediated transport // non-traceable author statement /// 6810 // transport // inferred from electronic annotation	5622 // intracellular // Unknown	5543 // phospholipid binding // non-traceable author statement	---
237799_at	96.4489	87.0883	0.902948	-0.147285	0.00360563	SLC22A12	AI733516	solute carrier family 22 (organic anion/cation transporter), member 12	15747 // urate transport // inferred from sequence or structural similarity /// 19725 // cell homeostasis // inferred from sequence or structural similarity /// 15747 // urate transport // inferred from direct assay /// 6810 // transport // inferred from electronic annotation /// 19725 // cell homeostasis // non-traceable author statement	5886 // plasma membrane // inferred from sequence or structural similarity /// 16021 // integral to membrane // inferred from sequence or structural similarity /// 16324 // apical plasma membrane // inferred from sequence or structural similarity /// 31526 // brush border membrane // inferred from sequence or structural similarity /// 5886 // plasma membrane // inferred from direct assay /// 1602…	30165 // PDZ domain binding // inferred from physical interaction /// 5515 // protein binding // inferred from sequence or structural similarity /// 15143 // urate transporter activity // inferred from sequence or structural similarity /// 30165 // PDZ domain binding // inferred from sequence or structural similarity /// 15143 // urate transporter activity // inferred from direct assay /// 5215 /…	---
240795_at	115.284	93.271	0.809053	-0.305695	0.00361555	---	AA001970	---	---	---	---	---
205907_s_at	52.4548	42.1691	0.803914	-0.314888	0.00362249	OMD	AI765819	osteomodulin	7155 // cell adhesion // inferred from electronic annotation	5578 // extracellular matrix (sensu Metazoa) // inferred from electronic annotation	5515 // protein binding // inferred from electronic annotation	---
229715_at	110.509	91.3386	0.826524	-0.274871	0.00363115	---	AW006182	CDNA FLJ41663 fis, clone FEBRA2027297	---	---	---	---
205338_s_at	116.784	103.216	0.883816	-0.178182	0.00363708	DCT	NM_001922	dopachrome tautomerase (dopachrome delta-isomerase, tyrosine-related protein 2)	6582 // melanin metabolism // non-traceable author statement /// 6583 // melanin biosynthesis from tyrosine // inferred from sequence or structural similarity /// 8152 // metabolism // inferred from electronic annotation /// 8544 // epidermis development // traceable author statement /// 6583 // melanin biosynthesis from tyrosine // inferred from electronic annotation /// 6583 // melanin biosynth…	5792 // microsome // inferred from sequence or structural similarity /// 5829 // cytosol // inferred from sequence or structural similarity /// 16020 // membrane // inferred from electronic annotation /// 16021 // integral to membrane // traceable author statement /// 42470 // melanosome // inferred from sequence or structural similarity /// 16021 // integral to membrane // inferred from electron…	4167 // dopachrome isomerase activity // inferred from sequence or structural similarity /// 4167 // dopachrome isomerase activity // non-traceable author statement /// 5507 // copper ion binding // traceable author statement /// 8270 // zinc ion binding // inferred from electronic annotation /// 16491 // oxidoreductase activity // inferred from electronic annotation /// 16853 // isomerase activi…	Tyrosine metabolism // KEGG
225133_at	120.153	136.792	1.13848	0.187113	0.00364256	---	AA130132	---	---	---	---	---
239747_s_at	123.073	100.658	0.817866	-0.290064	0.00365281	KIAA1199	AA150401	KIAA1199	7605 // sensory perception of sound // inferred from electronic annotation	---	---	---
219885_at	57.0448	40.5613	0.711044	-0.49199	0.00365307	SLFN12	NM_018042	schlafen family member 12	---	---	---	---
207601_at	128.905	99.3588	0.770788	-0.375594	0.00367144	SULT1B1	NM_014465	sulfotransferase family, cytosolic, 1B, member 1	6629 // lipid metabolism // inferred from electronic annotation /// 8202 // steroid metabolism // inferred from electronic annotation /// 18958 // phenol metabolism // inferred from direct assay /// 42403 // thyroid hormone metabolism // inferred from direct assay /// 6576 // biogenic amine metabolism // traceable author statement	5829 // cytosol // non-traceable author statement	8146 // sulfotransferase activity // inferred from direct assay /// 16740 // transferase activity // inferred from electronic annotation /// 8146 // sulfotransferase activity // inferred from electronic annotation /// 8146 // sulfotransferase activity // traceable author statement	---
223420_at	287.089	233.094	0.811924	-0.300583	0.00367985	DNAJC14	AA156470	DnaJ (Hsp40) homolog, subfamily C, member 14	6457 // protein folding // inferred from electronic annotation	---	31072 // heat shock protein binding // inferred from electronic annotation /// 51082 // unfolded protein binding // inferred from electronic annotation /// 4872 // receptor activity // inferred from electronic annotation	---
243840_at	119.164	89.5987	0.751894	-0.411399	0.00368155	LOC642981	BF691634	hypothetical protein LOC642981	---	---	---	---
225302_at	125.187	145.552	1.16268	0.217452	0.00369053	TXNDC10	BE503286	thioredoxin domain containing 10	6118 // electron transport // inferred from electronic annotation	5783 // endoplasmic reticulum // inferred from electronic annotation /// 16020 // membrane // inferred from electronic annotation /// 16021 // integral to membrane // inferred from electronic annotation	3756 // protein disulfide isomerase activity // inferred from electronic annotation /// 5509 // calcium ion binding // inferred from electronic annotation /// 16853 // isomerase activity // inferred from electronic annotation	---
242260_at	120.637	89.2883	0.74014	-0.43413	0.00369763	MATR3	BG283790	Matrin 3	---	5634 // nucleus // inferred from electronic annotation /// 5637 // nuclear inner membrane // traceable author statement	166 // nucleotide binding // inferred from electronic annotation /// 3676 // nucleic acid binding // inferred from electronic annotation /// 3723 // RNA binding // inferred from electronic annotation /// 5198 // structural molecule activity // traceable author statement /// 8270 // zinc ion binding // inferred from electronic annotation /// 46872 // metal ion binding // inferred from electronic a…	---
215566_x_at	210.696	180.729	0.857773	-0.221332	0.0037009	LYPLA2	AK024724	lysophospholipase II	6629 // lipid metabolism // inferred from electronic annotation /// 6631 // fatty acid metabolism // inferred from electronic annotation	---	3824 // catalytic activity // inferred from electronic annotation /// 16787 // hydrolase activity // inferred from electronic annotation	Glycerophospholipid metabolism // KEGG
205699_at	184.434	159.842	0.866667	-0.206451	0.00370526	---	U39657	---	---	---	---	---
235013_at	241.788	209.334	0.865777	-0.207933	0.00371004	SLC31A1	AI754064	solute carrier family 31 (copper transporters), member 1	6811 // ion transport // inferred from electronic annotation /// 6825 // copper ion transport // inferred from electronic annotation /// 6825 // copper ion transport // traceable author statement /// 6810 // transport // inferred from electronic annotation	5887 // integral to plasma membrane // traceable author statement /// 16020 // membrane // inferred from electronic annotation /// 16021 // integral to membrane // inferred from electronic annotation	5375 // copper ion transporter activity // inferred from electronic annotation /// 5375 // copper ion transporter activity // traceable author statement /// 5507 // copper ion binding // inferred from electronic annotation	---
1557311_at	126.219	110.692	0.87698	-0.189384	0.00372718	FLJ32569	BM128807	Hypothetical protein FLJ32569	6508 // proteolysis // inferred from electronic annotation	---	4180 // carboxypeptidase activity // inferred from electronic annotation /// 4226 // Gly-X carboxypeptidase activity // inferred from electronic annotation /// 8237 // metallopeptidase activity // inferred from electronic annotation /// 16787 // hydrolase activity // inferred from electronic annotation /// 46983 // protein dimerization activity // inferred from electronic annotation	---
235924_at	137.53	109.22	0.794151	-0.332514	0.00372753	---	N73742	CDNA FLJ42287 fis, clone TLIVE2005866	---	---	---	---
204551_s_at	86.3582	73.2562	0.848283	-0.237382	0.00373999	AHSG	NM_001622	alpha-2-HS-glycoprotein	1501 // skeletal development // non-traceable author statement /// 6907 // pinocytosis // non-traceable author statement /// 6953 // acute-phase response // inferred from direct assay /// 30502 // negative regulation of bone mineralization // inferred from sequence or structural similarity /// 46627 // negative regulation of insulin receptor signaling pathway // non-traceable author statement ///…	5615 // extracellular space // non-traceable author statement /// 5576 // extracellular region // non-traceable author statement	4869 // cysteine protease inhibitor activity // inferred from electronic annotation /// 19210 // kinase inhibitor activity // non-traceable author statement	---
206804_at	112.891	99.7436	0.883539	-0.178635	0.00376709	CD3G	NM_000073	CD3g molecule, gamma (CD3-TCR complex)	6461 // protein complex assembly // non-traceable author statement /// 7163 // establishment and/or maintenance of cell polarity // inferred from mutant phenotype /// 7166 // cell surface receptor linked signal transduction // inferred from mutant phenotype /// 15031 // protein transport // inferred from mutant phenotype /// 42110 // T cell activation // non-traceable author statement /// 42981 /…	5887 // integral to plasma membrane // non-traceable author statement /// 16020 // membrane // inferred from electronic annotation /// 42101 // T cell receptor complex // non-traceable author statement /// 16021 // integral to membrane // inferred from electronic annotation	4888 // transmembrane receptor activity // inferred from mutant phenotype /// 30159 // receptor signaling complex scaffold activity // non-traceable author statement /// 42608 // T cell receptor binding // non-traceable author statement /// 46982 // protein heterodimerization activity // inferred from physical interaction /// 4872 // receptor activity // inferred from electronic annotation /// 48…	---
225448_at	145.82	174.765	1.19849	0.261221	0.00377752	NAPG	AL519376	N-ethylmaleimide-sensitive factor attachment protein, gamma	6461 // protein complex assembly // non-traceable author statement /// 6886 // intracellular protein transport // inferred from electronic annotation /// 6888 // ER to Golgi vesicle-mediated transport // inferred from electronic annotation /// 6891 // intra-Golgi vesicle-mediated transport // traceable author statement /// 6944 // membrane fusion // traceable author statement /// 50821 // protein…	5624 // membrane fraction // non-traceable author statement /// 5739 // mitochondrion // inferred from direct assay /// 5783 // endoplasmic reticulum // inferred from electronic annotation /// 5794 // Golgi apparatus // inferred from electronic annotation	5478 // intracellular transporter activity // inferred from electronic annotation /// 5515 // protein binding // inferred from physical interaction /// 5488 // binding // inferred from electronic annotation	---
244387_at	170.1	127.416	0.749068	-0.416832	0.00378079	---	AW979271	Transcribed locus	---	---	---	---
220466_at	98.3689	80.0509	0.813783	-0.297285	0.00379066	CCDC15	NM_025004	coiled-coil domain containing 15	---	---	---	---
238728_at	163.492	145.37	0.889154	-0.169495	0.00379469	---	AA194266	Transcribed locus, moderately similar to NP_055301.1 neuronal thread protein AD7c-NTP [Homo sapiens]	---	---	---	---
1561572_at	143.21	127.779	0.892254	-0.164474	0.00380558	---	BC032891	CDNA clone IMAGE:5259428	---	---	---	---
223472_at	46.0942	51.3648	1.11434	0.156193	0.00382463	WHSC1	AF071594	Wolf-Hirschhorn syndrome candidate 1	6355 // regulation of transcription, DNA-dependent // inferred from electronic annotation /// 9653 // morphogenesis // traceable author statement	---	3677 // DNA binding // inferred from electronic annotation /// 5515 // protein binding // inferred from electronic annotation /// 8270 // zinc ion binding // inferred from electronic annotation	---
238536_at	140.973	113.687	0.806445	-0.310352	0.00383403	LOC653394	AW968465	Similar to phosphoglucomutase 5	5975 // carbohydrate metabolism // inferred from electronic annotation /// 6508 // proteolysis // inferred from electronic annotation	---	4252 // serine-type endopeptidase activity // inferred from electronic annotation /// 16868 // intramolecular transferase activity, phosphotransferases // inferred from electronic annotation	---
213191_at	73.3629	86.7976	1.18313	0.242604	0.0038361	TICAM1	AF070530	toll-like receptor adaptor molecule 1	43123 // positive regulation of I-kappaB kinase/NF-kappaB cascade // inferred from mutant phenotype	16020 // membrane // inferred from electronic annotation	4871 // signal transducer activity // inferred from mutant phenotype /// 5515 // protein binding // inferred from physical interaction /// 4888 // transmembrane receptor activity // inferred from electronic annotation	---
1568558_x_at	633.947	455.579	0.71864	-0.476659	0.0038432	---	AF267807	---	---	---	---	---
241226_at	62.8243	56.2482	0.895325	-0.159516	0.00384399	---	AA947596	Transcribed locus	---	---	---	---
1569415_at	221.29	198.188	0.895605	-0.159065	0.00384541	---	BC034930	---	---	---	---	---
226789_at	198.512	159.272	0.802329	-0.317734	0.00384827	---	W84421	CDNA FLJ46881 fis, clone UTERU3015647, moderately similar to Embigin precursor	---	---	---	---
1559495_at	71.6549	58.7496	0.819896	-0.286487	0.00384988	NECAP1	BC039122	NECAP endocytosis associated 1	6897 // endocytosis // inferred from electronic annotation /// 15031 // protein transport // inferred from electronic annotation /// 6810 // transport // inferred from electronic annotation	16020 // membrane // inferred from electronic annotation	---	---
1562433_at	125.71	107.346	0.85392	-0.227828	0.00385919	FLJ10489	AK001351	hypothetical protein FLJ10489	---	---	---	---
243904_at	112.68	133.385	1.18375	0.243369	0.00385947	---	AA204752	CDNA clone IMAGE:5287121	---	---	---	---
241646_s_at	53.1372	46.3249	0.871797	-0.197935	0.00386146	LOC641748 /// LOC646579	AW470942	hypothetical protein LOC641748 /// hypothetical protein LOC646579	---	---	---	---
244122_at	217.108	149.58	0.688964	-0.537499	0.00386453	MGST3	AA129724	Microsomal glutathione S-transferase 3	6629 // lipid metabolism // traceable author statement /// 7165 // signal transduction // traceable author statement /// 19735 // antimicrobial humoral response (sensu Vertebrata) // not recorded	5624 // membrane fraction // traceable author statement /// 5783 // endoplasmic reticulum // inferred from electronic annotation /// 5792 // microsome // traceable author statement /// 16020 // membrane // inferred from electronic annotation /// 16021 // integral to membrane // inferred from electronic annotation /// 5792 // microsome // inferred from electronic annotation	4364 // glutathione transferase activity // traceable author statement /// 4601 // peroxidase activity // traceable author statement /// 16740 // transferase activity // inferred from electronic annotation /// 4364 // glutathione transferase activity // inferred from electronic annotation	Glutathione metabolism // KEGG /// Metabolism of xenobiotics by cytochrome P450 // KEGG
234465_at	180.269	156.153	0.866219	-0.207196	0.00387932	EME1	AK021607	essential meiotic endonuclease 1 homolog 1 (S. pombe)	6281 // DNA repair // inferred from electronic annotation /// 6310 // DNA recombination // inferred from electronic annotation /// 6974 // response to DNA damage stimulus // inferred from electronic annotation	5634 // nucleus // inferred from electronic annotation	287 // magnesium ion binding // inferred from electronic annotation /// 4519 // endonuclease activity // inferred from electronic annotation /// 16787 // hydrolase activity // inferred from electronic annotation /// 4518 // nuclease activity // inferred from electronic annotation /// 46872 // metal ion binding // inferred from electronic annotation	---
1557731_at	104.374	87.4111	0.837481	-0.255872	0.0038797	LOC400620	BC035399	hypothetical gene supported by BC035399	---	---	---	---
210226_at	127.31	114.472	0.899155	-0.153359	0.00388028	NR4A1	D85245	nuclear receptor subfamily 4, group A, member 1	6350 // transcription // inferred from electronic annotation /// 6355 // regulation of transcription, DNA-dependent // inferred from electronic annotation /// 7165 // signal transduction // traceable author statement	5634 // nucleus // inferred from electronic annotation	3700 // transcription factor activity // inferred from electronic annotation /// 3707 // steroid hormone receptor activity // inferred from electronic annotation /// 4879 // ligand-dependent nuclear receptor activity // inferred from electronic annotation /// 8270 // zinc ion binding // inferred from electronic annotation /// 43565 // sequence-specific DNA binding // inferred from electronic anno…	Nuclear_Receptors // GenMAPP /// Nuclear_Receptors // GenMAPP /// Nuclear_Receptors // GenMAPP
217345_at	52.7352	45.5789	0.864297	-0.210401	0.00388093	---	U91640	---	---	---	---	---
228159_at	247.748	203.583	0.821736	-0.283253	0.00388326	---	N45312	CDNA FLJ38039 fis, clone CTONG2013934	---	---	---	---
231300_at	115.688	91.0202	0.786773	-0.34598	0.00388334	LOC90835	AI188143	hypothetical protein LOC90835	---	---	---	---
211768_at	78.6884	65.0343	0.826479	-0.27495	0.00389146	LAT2	BC006080	linker for activation of T cells family, member 2 /// linker for activation of T cells family, member 2	6955 // immune response // inferred from electronic annotation /// 7242 // intracellular signaling cascade // inferred from genetic interaction /// 19722 // calcium-mediated signaling // inferred from genetic interaction /// 42113 // B cell activation // traceable author statement /// 43303 // mast cell degranulation // inferred from electronic annotation	16020 // membrane // inferred from electronic annotation /// 16021 // integral to membrane // inferred from electronic annotation /// 45121 // lipid raft // inferred from direct assay	5515 // protein binding // inferred from physical interaction /// 42169 // SH2 domain binding // inferred from mutant phenotype	---
211755_s_at	4805.36	4112.22	0.855758	-0.224726	0.00389253	ATP5F1	BC005960	ATP synthase, H+ transporting, mitochondrial F0 complex, subunit B1 /// ATP synthase, H+ transporting, mitochondrial F0 complex, subunit B1	6811 // ion transport // inferred from electronic annotation /// 15986 // ATP synthesis coupled proton transport // inferred from electronic annotation /// 15992 // proton transport // inferred from electronic annotation /// 6810 // transport // inferred from electronic annotation	5624 // membrane fraction // not recorded /// 5739 // mitochondrion // traceable author statement /// 5759 // mitochondrial matrix // traceable author statement /// 16469 // proton-transporting two-sector ATPase complex // inferred from electronic annotation /// 45263 // proton-transporting ATP synthase complex, coupling factor F(o) // inferred from electronic annotation /// 5739 // mitochondrion…	5215 // transporter activity // non-traceable author statement /// 46933 // hydrogen-transporting ATP synthase activity, rotational mechanism // inferred from electronic annotation /// 46961 // hydrogen-transporting ATPase activity, rotational mechanism // inferred from electronic annotation /// 15078 // hydrogen ion transporter activity // inferred from electronic annotation	Electron_Transport_Chain // GenMAPP /// Oxidative phosphorylation // KEGG /// ATP synthesis // KEGG /// Photosynthesis // KEGG /// Flagellar assembly // KEGG /// Type III secretion system // KEGG /// Epithelial cell signaling in Helicobacter pylori // KEGG /// Purine metabolism // KEGG
207110_at	354.29	504.768	1.42473	0.510688	0.00389482	KCNJ12	NM_021012	potassium inwardly-rectifying channel, subfamily J, member 12	6811 // ion transport // inferred from electronic annotation /// 6813 // potassium ion transport // traceable author statement /// 6936 // muscle contraction // traceable author statement /// 8016 // regulation of heart contraction // traceable author statement /// 6810 // transport // inferred from electronic annotation /// 6813 // potassium ion transport // inferred from electronic annotation /…	5624 // membrane fraction // not recorded /// 5887 // integral to plasma membrane // not recorded /// 16020 // membrane // inferred from electronic annotation /// 16021 // integral to membrane // inferred from electronic annotation	5242 // inward rectifier potassium channel activity // inferred from electronic annotation /// 5242 // inward rectifier potassium channel activity // traceable author statement /// 5244 // voltage-gated ion channel activity // inferred from electronic annotation /// 5267 // potassium channel activity // inferred from electronic annotation /// 8200 // ion channel inhibitor activity // traceable au…	---
238072_at	103.628	88.5858	0.854845	-0.226265	0.00390058	---	AI073865	CDNA FLJ38016 fis, clone CTONG2012724	---	---	---	---
206243_at	394.662	323.334	0.819267	-0.287594	0.00390166	TIMP4	NM_003256	TIMP metallopeptidase inhibitor 4	---	5578 // extracellular matrix (sensu Metazoa) // inferred from electronic annotation /// 5576 // extracellular region // non-traceable author statement	4857 // enzyme inhibitor activity // inferred from electronic annotation /// 8191 // metalloendopeptidase inhibitor activity // non-traceable author statement /// 8191 // metalloendopeptidase inhibitor activity // inferred from electronic annotation	Matrix_Metalloproteinases // GenMAPP
240261_at	123.886	90.7039	0.732154	-0.449781	0.00390246	TOM1L1	AA913079	Target of myb1-like 1 (chicken)	6886 // intracellular protein transport // inferred from electronic annotation /// 6810 // transport // inferred from electronic annotation /// 15031 // protein transport // inferred from electronic annotation	5622 // intracellular // inferred from electronic annotation /// 5764 // lysosome // traceable author statement /// 5768 // endosome // traceable author statement /// 5795 // Golgi stack // inferred from electronic annotation /// 16020 // membrane // inferred from electronic annotation	---	---
1556661_at	90.6234	78.9194	0.87085	-0.199504	0.00391133	LOC150384	BC015721	Hypothetical protein LOC150384	---	---	---	---
226541_at	333.532	286.049	0.857634	-0.221565	0.00392257	FBXO30	AI808182	F-box protein 30	6512 // ubiquitin cycle // inferred from electronic annotation	---	8270 // zinc ion binding // inferred from electronic annotation /// 46872 // metal ion binding // inferred from electronic annotation	---
1562793_at	52.0352	40.444	0.777243	-0.363563	0.00392795	---	BC042005	CDNA clone IMAGE:5311285	---	---	---	---
233993_at	114.67	98.4907	0.858905	-0.219429	0.00394118	---	AF007192	---	7586 // digestion // non-traceable author statement	5576 // extracellular region // non-traceable author statement	30197 // extracellular matrix constituent, lubricant activity // non-traceable author statement	---
206650_at	75.806	65.0348	0.857911	-0.221101	0.0039528	IQCC	NM_018134	IQ motif containing C	---	---	---	---
241376_at	120.616	92.1663	0.764133	-0.388104	0.00395482	---	AV685992	---	---	---	---	---
213709_at	144.307	114.922	0.796373	-0.328484	0.00398551	BHLHB9	H11725	basic helix-loop-helix domain containing, class B, 9	---	16020 // membrane // inferred from electronic annotation /// 16021 // integral to membrane // inferred from electronic annotation	5488 // binding // inferred from electronic annotation	---
229587_at	158.678	131.975	0.831717	-0.265835	0.00399558	UBA2	AA974493	SUMO-1 activating enzyme subunit 2	6512 // ubiquitin cycle // inferred from electronic annotation /// 6464 // protein modification // inferred from electronic annotation	---	166 // nucleotide binding // inferred from electronic annotation /// 4839 // ubiquitin activating enzyme activity // inferred from electronic annotation /// 5524 // ATP binding // inferred from electronic annotation /// 8047 // enzyme activator activity // traceable author statement /// 8642 // ubiquitin-like activating enzyme activity // traceable author statement /// 16874 // ligase activity //…	---
233828_at	63.3346	49.6857	0.784495	-0.350163	0.0039966	---	AK026761	CDNA: FLJ23108 fis, clone LNG07742	---	---	---	---
221957_at	70.922	58.9934	0.831807	-0.265679	0.00399681	PDK3	BF939522	Pyruvate dehydrogenase kinase, isozyme 3	6006 // glucose metabolism // traceable author statement /// 6468 // protein amino acid phosphorylation // inferred from electronic annotation /// 16310 // phosphorylation // inferred from electronic annotation	5739 // mitochondrion // traceable author statement /// 5739 // mitochondrion // inferred from electronic annotation	4740 // [pyruvate dehydrogenase (lipoamide)] kinase activity // traceable author statement /// 5524 // ATP binding // inferred from electronic annotation /// 4740 // [pyruvate dehydrogenase (lipoamide)] kinase activity // inferred from electronic annotation /// 16301 // kinase activity // inferred from electronic annotation /// 16740 // transferase activity // inferred from electronic annotation …	Krebs-TCA_Cycle // GenMAPP
224091_at	92.724	80.3407	0.86645	-0.206812	0.00400338	---	AF116642	---	---	---	---	---
228247_at	241.216	211.873	0.878354	-0.187126	0.00400679	LOC283788	H43637	hypothetical protein LOC283788	---	---	---	---
234371_at	148.171	127.393	0.859768	-0.217981	0.00401765	---	Z84476	---	6350 // transcription // inferred from electronic annotation /// 6355 // regulation of transcription, DNA-dependent // inferred from electronic annotation /// 7283 // spermatogenesis // traceable author statement /// 8283 // cell proliferation // traceable author statement	5622 // intracellular // inferred from electronic annotation /// 5634 // nucleus // inferred from electronic annotation /// 5624 // membrane fraction // traceable author statement /// 5887 // integral to plasma membrane // traceable author statement	3677 // DNA binding // inferred from electronic annotation /// 5515 // protein binding // inferred from electronic annotation /// 8270 // zinc ion binding // inferred from electronic annotation /// 46872 // metal ion binding // inferred from electronic annotation /// 3676 // nucleic acid binding // inferred from electronic annotation /// 3676 // nucleic acid binding // traceable author statement …	---
242531_at	61.1798	52.8263	0.863461	-0.211798	0.00402772	RRAGC	H56010	Ras-related GTP binding C	7264 // small GTPase mediated signal transduction // traceable author statement /// 6350 // transcription // non-traceable author statement /// 6915 // apoptosis // non-traceable author statement /// 8380 // RNA splicing // non-traceable author statement /// 16049 // cell growth // non-traceable author statement	5634 // nucleus // inferred from direct assay /// 5737 // cytoplasm // inferred from direct assay /// 5634 // nucleus // inferred from electronic annotation /// 5737 // cytoplasm // inferred from electronic annotation	5515 // protein binding // inferred from physical interaction /// 46982 // protein heterodimerization activity // inferred from physical interaction /// 3924 // GTPase activity // inferred from direct assay /// 19003 // GDP binding // inferred from direct assay /// 5525 // GTP binding // inferred from electronic annotation /// 287 // magnesium ion binding // non-traceable author statement	---
218291_at	235.073	258.383	1.09916	0.136398	0.0040302	MAPBPIP	NM_014017	mitogen-activated protein-binding protein-interacting protein	---	5795 // Golgi stack // inferred from electronic annotation /// 16020 // membrane // inferred from electronic annotation /// 16021 // integral to membrane // inferred from electronic annotation	4653 // polypeptide N-acetylgalactosaminyltransferase activity // inferred from electronic annotation /// 5509 // calcium ion binding // inferred from electronic annotation /// 5529 // sugar binding // inferred from electronic annotation /// 16740 // transferase activity // inferred from electronic annotation /// 16757 // transferase activity, transferring glycosyl groups // inferred from electro…	---
234067_at	55.2077	43.5386	0.788632	-0.342575	0.00403298	NMD3	AK001076	NMD3 homolog (S. cerevisiae)	---	---	---	---
215932_at	52.5738	43.639	0.830053	-0.268725	0.00403883	MAGEC2	AL031073	melanoma antigen family C, 2	74 // regulation of progression through cell cycle // inferred from expression pattern	5634 // nucleus // inferred from direct assay /// 5737 // cytoplasm // inferred from direct assay /// 5634 // nucleus // inferred from electronic annotation	---	---
238918_at	58.8919	47.0498	0.798918	-0.323881	0.00405025	---	AI985021	CDNA FLJ42015 fis, clone SPLEN2032813	---	---	---	---
1555886_at	157.833	131.843	0.835334	-0.259575	0.0040515	PDSS2	BC029491	prenyl (decaprenyl) diphosphate synthase, subunit 2	6744 // ubiquinone biosynthesis // inferred from electronic annotation /// 8299 // isoprenoid biosynthesis // inferred from electronic annotation	---	16740 // transferase activity // inferred from electronic annotation	---
210414_at	146.345	116.367	0.795154	-0.330694	0.00405297	FLRT1	AF169675	fibronectin leucine rich transmembrane protein 1	7155 // cell adhesion // inferred from electronic annotation	16020 // membrane // inferred from electronic annotation /// 16021 // integral to membrane // inferred from electronic annotation /// 5578 // extracellular matrix (sensu Metazoa) // non-traceable author statement /// 5887 // integral to plasma membrane // non-traceable author statement	5515 // protein binding // inferred from electronic annotation /// 5057 // receptor signaling protein activity // non-traceable author statement /// 30674 // protein binding, bridging // non-traceable author statement	---
215149_at	88.1493	74.2223	0.842007	-0.248096	0.00407116	---	AF052109	CDNA clone IMAGE:5260262	---	---	---	---
201135_at	1409.26	1193.78	0.847095	-0.239405	0.00407133	ECHS1	NM_004092	enoyl Coenzyme A hydratase, short chain, 1, mitochondrial	6091 // generation of precursor metabolites and energy // not recorded /// 6629 // lipid metabolism // inferred from electronic annotation /// 6631 // fatty acid metabolism // inferred from electronic annotation /// 6635 // fatty acid beta-oxidation // traceable author statement /// 8152 // metabolism // inferred from electronic annotation	5739 // mitochondrion // traceable author statement /// 5739 // mitochondrion // inferred from electronic annotation	4300 // enoyl-CoA hydratase activity // traceable author statement /// 16829 // lyase activity // inferred from electronic annotation /// 3824 // catalytic activity // inferred from electronic annotation /// 4300 // enoyl-CoA hydratase activity // inferred from electronic annotation	Fatty acid elongation in mitochondria // KEGG /// Fatty acid metabolism // KEGG /// Valine, leucine and isoleucine degradation // KEGG /// Lysine degradation // KEGG /// Tryptophan metabolism // KEGG /// beta-Alanine metabolism // KEGG /// Benzoate degradation via CoA ligation // KEGG /// Propanoate metabolism // KEGG /// Butanoate metabolism // KEGG /// Limonene and pinene degradation // KEGG //…
236648_at	237.973	198.132	0.83258	-0.264339	0.00407232	---	AI684467	Transcribed locus, strongly similar to XP_130877.2 PREDICTED: guanine monphosphate synthetase [Mus musculus]	---	---	---	---
221142_s_at	129.08	109.868	0.851163	-0.232492	0.00408122	PECR	NM_018441	peroxisomal trans-2-enoyl-CoA reductase	6633 // fatty acid biosynthesis // inferred from electronic annotation /// 8152 // metabolism // inferred from electronic annotation /// 8610 // lipid biosynthesis // inferred from electronic annotation	5777 // peroxisome // inferred from electronic annotation	16491 // oxidoreductase activity // inferred from electronic annotation /// 19166 // trans-2-enoyl-CoA reductase (NADPH) activity // inferred from electronic annotation	Mitochondrial_fatty_acid_betaoxidation // GenMAPP
213023_at	99.6944	86.1582	0.864223	-0.210525	0.00408402	UTRN	NM_007124	utrophin (homologous to dystrophin)	6936 // muscle contraction // traceable author statement /// 7517 // muscle development // traceable author statement	5624 // membrane fraction // traceable author statement /// 5856 // cytoskeleton // traceable author statement /// 5886 // plasma membrane // traceable author statement /// 5856 // cytoskeleton // inferred from electronic annotation	3779 // actin binding // inferred from electronic annotation /// 5198 // structural molecule activity // inferred from electronic annotation /// 5509 // calcium ion binding // inferred from electronic annotation /// 5515 // protein binding // inferred from physical interaction /// 8270 // zinc ion binding // inferred from electronic annotation /// 46872 // metal ion binding // inferred from elect…	---
232047_at	95.0262	85.1541	0.896112	-0.158249	0.00408738	---	AA913635	---	---	---	---	---
229395_at	131.825	112.202	0.851145	-0.232523	0.00411228	---	BF939292	---	---	---	---	---
219306_at	75.4041	63.5544	0.842851	-0.24665	0.00412441	KIF15	NM_020242	kinesin family member 15	160 // two-component signal transduction system (phosphorelay) // inferred from electronic annotation /// 7018 // microtubule-based movement // inferred from electronic annotation /// 7067 // mitosis // traceable author statement /// 8283 // cell proliferation // traceable author statement	5875 // microtubule associated complex // inferred from electronic annotation /// 16021 // integral to membrane // inferred from electronic annotation /// 5813 // centrosome // traceable author statement /// 5873 // plus-end kinesin complex // traceable author statement	155 // two-component sensor activity // inferred from electronic annotation /// 3777 // microtubule motor activity // inferred from electronic annotation /// 5524 // ATP binding // inferred from electronic annotation /// 4872 // receptor activity // inferred from electronic annotation /// 3677 // DNA binding // traceable author statement /// 3774 // motor activity // traceable author statement	---
1563577_at	162.241	139.924	0.862448	-0.213491	0.0041279	---	AL833881	MRNA; cDNA DKFZp434L1127 (from clone DKFZp434L1127)	---	---	---	---
244353_s_at	175.577	145.691	0.829785	-0.26919	0.004134	SLC2A12	AI675682	solute carrier family 2 (facilitated glucose transporter), member 12	6810 // transport // inferred from electronic annotation /// 8643 // carbohydrate transport // inferred from electronic annotation	16020 // membrane // inferred from electronic annotation /// 16021 // integral to membrane // inferred from electronic annotation	5215 // transporter activity // inferred from electronic annotation /// 5351 // sugar porter activity // inferred from electronic annotation	---
242419_at	84.0882	74.5298	0.886328	-0.174087	0.004135	---	AW003369	Transcribed locus	---	---	---	---
231567_s_at	124.148	110.376	0.889072	-0.169627	0.00414414	CCDC62	AI027946	coiled-coil domain containing 62	---	---	---	---
1554736_at	88.1873	73.1624	0.829625	-0.269468	0.00417062	ARHGAP29	BC022483	Rho GTPase activating protein 29	7242 // intracellular signaling cascade // inferred from electronic annotation /// 7266 // Rho protein signal transduction // traceable author statement /// 46080 // dUTP metabolism // inferred from electronic annotation	---	5100 // Rho GTPase activator activity // traceable author statement	---
204151_x_at	474.74	698.296	1.4709	0.5567	0.00418593	AKR1C1	NM_001353	aldo-keto reductase family 1, member C1 (dihydrodiol dehydrogenase 1; 20-alpha (3-alpha)-hydroxysteroid dehydrogenase)	6805 // xenobiotic metabolism // traceable author statement	5737 // cytoplasm // not recorded	4033 // aldo-keto reductase activity // traceable author statement /// 5488 // binding // traceable author statement /// 15125 // bile acid transporter activity // traceable author statement /// 16491 // oxidoreductase activity // inferred from electronic annotation /// 47006 // 20-alpha-hydroxysteroid dehydrogenase activity // inferred from electronic annotation /// 47115 // trans-1,2-dihydroben…	Metabolism of xenobiotics by cytochrome P450 // KEGG
241474_at	52.3354	43.388	0.829037	-0.270492	0.00418841	---	AA928233	---	---	---	---	---
242998_at	80.3213	71.1719	0.886089	-0.174476	0.0041982	RDH12	AI796235	retinol dehydrogenase 12 (all-trans/9-cis/11-cis)	8152 // metabolism // inferred from electronic annotation /// 42572 // retinol metabolism // inferred from direct assay /// 45494 // photoreceptor maintenance // traceable author statement /// 50896 // response to stimulus // inferred from electronic annotation /// 7601 // visual perception // inferred from electronic annotation /// 7601 // visual perception // traceable author statement	5622 // intracellular // inferred from direct assay	4745 // retinol dehydrogenase activity // inferred from direct assay /// 16491 // oxidoreductase activity // inferred from electronic annotation	---
1553809_a_at	226.874	198.204	0.873633	-0.194901	0.00420011	C9orf71	NM_153237	chromosome 9 open reading frame 71	---	16020 // membrane // inferred from electronic annotation /// 16021 // integral to membrane // inferred from electronic annotation	---	---
235541_at	89.8622	77.7149	0.864823	-0.209524	0.00420525	LAS1L	AL042052	LAS1-like (S. cerevisiae)	---	5634 // nucleus // inferred from electronic annotation	---	---
216743_at	120.734	106.592	0.882865	-0.179735	0.00420771	ADCY6	AK024915	Adenylate cyclase 6	6171 // cAMP biosynthesis // inferred from electronic annotation /// 7242 // intracellular signaling cascade // inferred from electronic annotation /// 9190 // cyclic nucleotide biosynthesis // inferred from electronic annotation	16020 // membrane // inferred from electronic annotation /// 16021 // integral to membrane // inferred from electronic annotation	287 // magnesium ion binding // inferred from electronic annotation /// 4016 // adenylate cyclase activity // inferred from electronic annotation /// 16829 // lyase activity // inferred from electronic annotation /// 16849 // phosphorus-oxygen lyase activity // inferred from electronic annotation /// 46872 // metal ion binding // inferred from electronic annotation	G_Protein_Signaling // GenMAPP /// Calcium_regulation_in_cardiac_cells // GenMAPP /// Smooth_muscle_contraction // GenMAPP /// Purine metabolism // KEGG /// Calcium signaling pathway // KEGG /// Gap junction // KEGG /// Long-term potentiation // KEGG /// Olfactory transduction // KEGG /// Taste transduction // KEGG
203707_at	149.599	124.686	0.83347	-0.262798	0.00420809	ZNF263	NM_005741	zinc finger protein 263	6350 // transcription // inferred from electronic annotation /// 6355 // regulation of transcription, DNA-dependent // traceable author statement /// 6355 // regulation of transcription, DNA-dependent // inferred from electronic annotation	5634 // nucleus // inferred from electronic annotation /// 5622 // intracellular // inferred from electronic annotation	3700 // transcription factor activity // traceable author statement /// 8270 // zinc ion binding // inferred from electronic annotation /// 46872 // metal ion binding // inferred from electronic annotation /// 3676 // nucleic acid binding // inferred from electronic annotation /// 3677 // DNA binding // inferred from electronic annotation /// 3700 // transcription factor activity // inferred from…	---
220505_at	114.929	96.339	0.838251	-0.254545	0.00421723	C9orf53	NM_016349	chromosome 9 open reading frame 53	---	---	---	---
232789_at	156.375	129.45	0.827814	-0.272621	0.00421942	---	AK024380	---	---	---	---	---
230348_at	171.126	142.931	0.835239	-0.25974	0.00421959	LATS2	AI745254	LATS, large tumor suppressor, homolog 2 (Drosophila)	82 // G1/S transition of mitotic cell cycle // inferred from direct assay /// 6468 // protein amino acid phosphorylation // inferred from direct assay /// 7049 // cell cycle // inferred from electronic annotation /// 7067 // mitosis // inferred from electronic annotation /// 7243 // protein kinase cascade // inferred from direct assay /// 9755 // hormone-mediated signaling // inferred from direct…	922 // spindle pole // inferred from direct assay /// 5634 // nucleus // non-traceable author statement	166 // nucleotide binding // inferred from electronic annotation /// 287 // magnesium ion binding // inferred from electronic annotation /// 4674 // protein serine/threonine kinase activity // inferred from direct assay /// 4674 // protein serine/threonine kinase activity // non-traceable author statement /// 5524 // ATP binding // inferred from direct assay /// 5524 // ATP binding // non-traceab…	---
207038_at	125.181	97.706	0.780519	-0.357494	0.00422635	SLC16A6	NM_004694	solute carrier family 16 (monocarboxylic acid transporters), member 6	6810 // transport // inferred from electronic annotation /// 15718 // monocarboxylic acid transport // traceable author statement	5624 // membrane fraction // traceable author statement /// 5887 // integral to plasma membrane // traceable author statement /// 16020 // membrane // inferred from electronic annotation /// 16021 // integral to membrane // inferred from electronic annotation	5215 // transporter activity // inferred from electronic annotation /// 8028 // monocarboxylic acid transporter activity // traceable author statement /// 15293 // symporter activity // inferred from electronic annotation	---
225218_at	211.952	182.743	0.86219	-0.213923	0.00422785	ZFYVE27	AA205754	zinc finger, FYVE domain containing 27	---	---	8270 // zinc ion binding // inferred from electronic annotation	---
210262_at	94.6451	79.2678	0.837526	-0.255793	0.00423435	CRISP2	M25532	cysteine-rich secretory protein 2	---	5576 // extracellular region // inferred from electronic annotation /// 5615 // extracellular space // traceable author statement	---	---
228168_at	369.288	313.886	0.849974	-0.234509	0.00424986	ATP5G3	AU153583	ATP synthase, H+ transporting, mitochondrial F0 complex, subunit C3 (subunit 9)	6091 // generation of precursor metabolites and energy // not recorded /// 6811 // ion transport // inferred from electronic annotation /// 15986 // ATP synthesis coupled proton transport // inferred from electronic annotation /// 15992 // proton transport // inferred from electronic annotation /// 6810 // transport // inferred from electronic annotation	5624 // membrane fraction // not recorded /// 5739 // mitochondrion // inferred from electronic annotation /// 5753 // proton-transporting ATP synthase complex (sensu Eukaryota) // traceable author statement /// 16020 // membrane // inferred from electronic annotation /// 16469 // proton-transporting two-sector ATPase complex // inferred from electronic annotation /// 45263 // proton-transporting…	5215 // transporter activity // non-traceable author statement /// 5515 // protein binding // inferred from physical interaction /// 8289 // lipid binding // inferred from electronic annotation /// 46933 // hydrogen-transporting ATP synthase activity, rotational mechanism // inferred from electronic annotation /// 46961 // hydrogen-transporting ATPase activity, rotational mechanism // inferred fr…	Electron_Transport_Chain // GenMAPP /// Oxidative phosphorylation // KEGG /// ATP synthesis // KEGG /// Photosynthesis // KEGG /// Flagellar assembly // KEGG /// Type III secretion system // KEGG /// Epithelial cell signaling in Helicobacter pylori // KEGG /// Purine metabolism // KEGG
1562253_at	69.4304	55.8522	0.804434	-0.313954	0.0042547	LOC641364	BC040999	hypothetical protein LOC641364	---	---	---	---
203578_s_at	102.311	87.8923	0.859073	-0.219147	0.00425858	SLC7A6	BG230586	solute carrier family 7 (cationic amino acid transporter, y+ system), member 6	6461 // protein complex assembly // traceable author statement /// 6520 // amino acid metabolism // traceable author statement /// 6810 // transport // inferred from electronic annotation /// 6810 // transport // traceable author statement /// 6865 // amino acid transport // inferred from electronic annotation	5886 // plasma membrane // traceable author statement /// 5887 // integral to plasma membrane // traceable author statement /// 16020 // membrane // inferred from electronic annotation /// 16021 // integral to membrane // inferred from electronic annotation	5279 // amino acid-polyamine transporter activity // inferred from electronic annotation /// 15171 // amino acid transporter activity // traceable author statement	---
227193_at	69.536	76.4591	1.09956	0.136928	0.0042712	---	AI955713	CDNA FLJ37631 fis, clone BRCOC2015944	---	---	---	---
39854_r_at	2960.5	2480.2	0.837766	-0.255381	0.00428164	PNPLA2	AF055000	patatin-like phospholipase domain containing 2	6629 // lipid metabolism // inferred from electronic annotation	---	---	---
204232_at	111.932	97.7322	0.873143	-0.195711	0.0042911	FCER1G	NM_004106	Fc fragment of IgE, high affinity I, receptor for; gamma polypeptide	6955 // immune response // not recorded /// 7166 // cell surface receptor linked signal transduction // inferred from electronic annotation	5886 // plasma membrane // traceable author statement /// 5887 // integral to plasma membrane // traceable author statement /// 16020 // membrane // inferred from electronic annotation /// 16021 // integral to membrane // inferred from electronic annotation	4888 // transmembrane receptor activity // inferred from electronic annotation /// 5057 // receptor signaling protein activity // not recorded /// 5515 // protein binding // inferred from physical interaction /// 19863 // IgE binding // inferred from electronic annotation /// 4872 // receptor activity // inferred from electronic annotation	---
234674_at	144.523	125.793	0.870401	-0.200247	0.00432667	RAB28	AK027027	RAB28, member RAS oncogene family	7264 // small GTPase mediated signal transduction // inferred from electronic annotation /// 6886 // intracellular protein transport // inferred from electronic annotation /// 15031 // protein transport // inferred from electronic annotation	16020 // membrane // inferred from electronic annotation /// 178 // exosome (RNase complex) // inferred from electronic annotation /// 5622 // intracellular // inferred from electronic annotation	166 // nucleotide binding // inferred from electronic annotation /// 3924 // GTPase activity // traceable author statement /// 5525 // GTP binding // inferred from electronic annotation	---
205643_s_at	118.656	104.487	0.880592	-0.183454	0.00433179	PPP2R2B	NM_004576	protein phosphatase 2 (formerly 2A), regulatory subunit B (PR 52), beta isoform	7165 // signal transduction // inferred from electronic annotation	159 // protein phosphatase type 2A complex // inferred from electronic annotation	8601 // protein phosphatase type 2A regulator activity // inferred from electronic annotation /// 8601 // protein phosphatase type 2A regulator activity // traceable author statement	Glycogen_Metabolism // GenMAPP /// Calcium signaling pathway // KEGG /// Apoptosis // KEGG /// Wnt signaling pathway // KEGG /// TGF-beta signaling pathway // KEGG /// Axon guidance // KEGG /// VEGF signaling pathway // KEGG /// Focal adhesion // KEGG /// Tight junction // KEGG /// T cell receptor signaling pathway // KEGG /// B cell receptor signaling pathway // KEGG /// Long-term potentiation /…
1558348_at	97.8294	85.3674	0.872615	-0.196583	0.00433613	MRPL46	AA806003	Mitochondrial ribosomal protein L46	---	5739 // mitochondrion // inferred from electronic annotation /// 30529 // ribonucleoprotein complex // inferred from electronic annotation	---	---
213279_at	181.035	151.476	0.836722	-0.25718	0.00433659	DHRS1	AL050217	dehydrogenase/reductase (SDR family) member 1	8152 // metabolism // inferred from electronic annotation	---	16491 // oxidoreductase activity // inferred from electronic annotation	---
238424_at	429.316	367.798	0.856706	-0.223127	0.00433714	ADAL	BE788266	adenosine deaminase-like	9168 // purine ribonucleoside monophosphate biosynthesis // inferred from electronic annotation	---	19239 // deaminase activity // inferred from electronic annotation	---
243911_at	124.605	109.87	0.881744	-0.181568	0.00434405	ARPC4	AI658485	Actin related protein 2/3 complex, subunit 4, 20kDa	30041 // actin filament polymerization // inferred from electronic annotation /// 45010 // actin nucleation // traceable author statement /// 6464 // protein modification // inferred from electronic annotation	5856 // cytoskeleton // inferred from electronic annotation /// 5885 // Arp2/3 protein complex // traceable author statement	5200 // structural constituent of cytoskeleton // traceable author statement /// 30674 // protein binding, bridging // traceable author statement /// 51015 // actin filament binding // traceable author statement /// 4835 // tubulin-tyrosine ligase activity // inferred from electronic annotation /// 16874 // ligase activity // inferred from electronic annotation	---
232245_at	564.037	326.437	0.57875	-0.788988	0.00434992	SLC25A34	AU151211	solute carrier family 25, member 34	6810 // transport // inferred from electronic annotation	16020 // membrane // inferred from electronic annotation /// 16021 // integral to membrane // inferred from electronic annotation	5488 // binding // inferred from electronic annotation	---
235223_at	44.8501	53.6183	1.1955	0.257615	0.00435321	---	AW515799	---	---	---	---	---
212861_at	83.4636	94.6276	1.13376	0.181114	0.0043734	MFSD5	BF690150	major facilitator superfamily domain containing 5	---	---	---	---
234324_at	89.7672	74.4093	0.828914	-0.270705	0.00437823	NHSL1	AK000699	NHS-like 1	---	---	---	---
202241_at	456.839	614.623	1.34538	0.428015	0.00438941	TRIB1	NM_025195	tribbles homolog 1 (Drosophila)	6468 // protein amino acid phosphorylation // traceable author statement /// 43405 // regulation of MAPK activity // inferred from direct assay /// 6468 // protein amino acid phosphorylation // inferred from electronic annotation	---	4672 // protein kinase activity // traceable author statement /// 4860 // protein kinase inhibitor activity // inferred from electronic annotation /// 5515 // protein binding // inferred from physical interaction /// 5524 // ATP binding // traceable author statement /// 4672 // protein kinase activity // inferred from electronic annotation /// 4674 // protein serine/threonine kinase activity // i…	---
204598_at	194.871	213.729	1.09677	0.133266	0.00439242	UBOX5	NM_014948	U-box domain containing 5	16567 // protein ubiquitination // inferred from electronic annotation /// 6512 // ubiquitin cycle // inferred from electronic annotation /// 6915 // apoptosis // inferred from electronic annotation	151 // ubiquitin ligase complex // inferred from electronic annotation /// 5634 // nucleus // inferred from electronic annotation	4842 // ubiquitin-protein ligase activity // inferred from electronic annotation /// 5515 // protein binding // inferred from electronic annotation /// 8270 // zinc ion binding // inferred from electronic annotation /// 46872 // metal ion binding // inferred from electronic annotation /// 4672 // protein kinase activity // inferred from electronic annotation /// 5524 // ATP binding // inferred fr…	---
244506_at	79.5408	66.4362	0.835247	-0.259725	0.00439524	TMTC1 /// LOC653626	BE297946	transmembrane and tetratricopeptide repeat containing 1 /// similar to ARG99 protein	---	---	5488 // binding // inferred from electronic annotation /// 16757 // transferase activity, transferring glycosyl groups // inferred from electronic annotation /// 16740 // transferase activity // inferred from electronic annotation	---
217026_at	158.05	120.831	0.764513	-0.387387	0.00439712	CFTR	M96936	cystic fibrosis transmembrane conductance regulator, ATP-binding cassette (sub-family C, member 7)	6811 // ion transport // inferred from electronic annotation /// 7585 // respiratory gaseous exchange // traceable author statement /// 6810 // transport // inferred from electronic annotation /// 6810 // transport // traceable author statement	16020 // membrane // inferred from electronic annotation /// 16021 // integral to membrane // inferred from electronic annotation /// 16323 // basolateral plasma membrane // non-traceable author statement /// 16324 // apical plasma membrane // non-traceable author statement	166 // nucleotide binding // inferred from electronic annotation /// 5216 // ion channel activity // inferred from electronic annotation /// 5224 // ATP-binding and phosphorylation-dependent chloride channel activity // traceable author statement /// 5260 // channel-conductance-controlling ATPase activity // non-traceable author statement /// 5515 // protein binding // inferred from physical inte…	---
44696_at	348.073	307.189	0.882542	-0.180263	0.00440846	TBC1D13	AA915989	TBC1 domain family, member 13	---	---	5096 // GTPase activator activity // inferred from electronic annotation	---
216075_at	102.293	84.3649	0.824735	-0.277998	0.00441189	ST3GAL5	AF119418	---	---	---	---	---
201941_at	169.184	138.671	0.819646	-0.286926	0.00442191	CPD	BE349147	carboxypeptidase D	6508 // proteolysis // inferred from electronic annotation	5624 // membrane fraction // traceable author statement /// 16020 // membrane // inferred from electronic annotation /// 16021 // integral to membrane // inferred from electronic annotation	4180 // carboxypeptidase activity // inferred from electronic annotation /// 4182 // carboxypeptidase A activity // inferred from electronic annotation /// 4187 // carboxypeptidase D activity // traceable author statement /// 8237 // metallopeptidase activity // inferred from electronic annotation /// 8270 // zinc ion binding // inferred from electronic annotation /// 8472 // metallocarboxypeptid…	---
239130_at	66.1287	58.4586	0.884012	-0.177862	0.00443072	---	AA905821	---	---	---	---	---
203015_s_at	50.455	58.3023	1.15553	0.208556	0.00443148	SSX2IP	AW136988	synovial sarcoma, X breakpoint 2 interacting protein	7155 // cell adhesion // inferred from electronic annotation	5634 // nucleus // inferred from electronic annotation	5515 // protein binding // inferred from electronic annotation	---
1569665_at	93.0129	80.7283	0.867926	-0.204356	0.00443818	SLC37A3	BC035773	Solute carrier family 37 (glycerol-3-phosphate transporter), member 3	6810 // transport // inferred from electronic annotation	16020 // membrane // inferred from electronic annotation /// 16021 // integral to membrane // inferred from electronic annotation	5215 // transporter activity // inferred from electronic annotation	---
1554219_at	288.907	202.862	0.702171	-0.510105	0.00444496	---	BC027448	---	---	---	---	---
213484_at	178.019	140.499	0.789238	-0.341468	0.00444804	---	AI097640	Clone 23700 mRNA sequence	---	---	---	---
240359_at	116.31	100.13	0.860885	-0.216107	0.00445046	C20orf71	AI638623	chromosome 20 open reading frame 71	---	---	8289 // lipid binding // inferred from electronic annotation	---
205075_at	87.3454	72.4236	0.829162	-0.270273	0.00445309	SERPINF2	NM_000934	serpin peptidase inhibitor, clade F (alpha-2 antiplasmin, pigment epithelium derived factor), member 2	6953 // acute-phase response // inferred from electronic annotation	5576 // extracellular region // non-traceable author statement /// 5794 // Golgi apparatus // not recorded	4867 // serine-type endopeptidase inhibitor activity // non-traceable author statement /// 5515 // protein binding // inferred from physical interaction /// 4866 // endopeptidase inhibitor activity // inferred from electronic annotation /// 4867 // serine-type endopeptidase inhibitor activity // inferred from electronic annotation /// 4866 // endopeptidase inhibitor activity // traceable author s…	Blood_Clotting_Cascade // GenMAPP /// Blood_Clotting_Cascade // GenMAPP
205786_s_at	161.533	127.792	0.79112	-0.338032	0.00445332	ITGAM	NM_000632	integrin, alpha M (complement component 3 receptor 3 subunit) /// integrin, alpha M (complement component 3 receptor 3 subunit)	7155 // cell adhesion // inferred from electronic annotation /// 7155 // cell adhesion // traceable author statement /// 7229 // integrin-mediated signaling pathway // inferred from electronic annotation	8305 // integrin complex // inferred from electronic annotation /// 8305 // integrin complex // traceable author statement /// 16020 // membrane // inferred from electronic annotation /// 16021 // integral to membrane // inferred from electronic annotation	287 // magnesium ion binding // inferred from electronic annotation /// 1948 // glycoprotein binding // inferred from physical interaction /// 4872 // receptor activity // inferred from electronic annotation /// 5509 // calcium ion binding // inferred from electronic annotation /// 5515 // protein binding // inferred from electronic annotation	Integrin-mediated_cell_adhesion_KEGG // GenMAPP
243423_at	438.453	350.9	0.800314	-0.321362	0.00446525	---	AF150368	Transcribed locus	---	---	---	---
244221_at	156.517	131	0.836967	-0.256757	0.00446803	---	AV647829	---	---	---	---	---
1552497_a_at	105.863	86.2777	0.814993	-0.295141	0.00446806	SLAMF6	NM_052931	SLAM family member 6	---	16020 // membrane // inferred from electronic annotation /// 16021 // integral to membrane // inferred from electronic annotation	4872 // receptor activity // inferred from electronic annotation	---
1563086_at	123.676	108.483	0.877158	-0.189091	0.00448115	---	BC039472	CDNA clone IMAGE:5526877	---	---	---	---
210394_x_at	116.55	98.2947	0.84337	-0.245763	0.00449706	SSX4 /// SSX4B	BC005325	synovial sarcoma, X breakpoint 4 /// synovial sarcoma, X breakpoint 4B	6350 // transcription // inferred from electronic annotation /// 6355 // regulation of transcription, DNA-dependent // inferred from electronic annotation	5622 // intracellular // inferred from electronic annotation	3676 // nucleic acid binding // inferred from electronic annotation	---
243185_at	349.216	291.353	0.834307	-0.261349	0.00449986	---	AA804267	Full-length cDNA clone CS0DL010YP06 of B cells (Ramos cell line) Cot 25-normalized of Homo sapiens (human)	---	---	---	---
1563471_at	61.7206	54.961	0.890481	-0.167343	0.00450583	KIAA1632	AL833448	KIAA1632	---	---	---	---
222093_s_at	182.671	149.042	0.8159	-0.293535	0.00451416	ZNHIT4	BF223045	zinc finger, HIT type 4	---	5634 // nucleus // inferred from electronic annotation	8270 // zinc ion binding // inferred from electronic annotation /// 46872 // metal ion binding // inferred from electronic annotation	---
1557207_s_at	478.744	401.193	0.838012	-0.254957	0.00451545	LOC283177	AI743605	hypothetical protein LOC283177	---	---	---	---
207224_s_at	146.202	132.417	0.90571	-0.142878	0.00454493	SIGLEC7	NM_016543	sialic acid binding Ig-like lectin 7	7155 // cell adhesion // inferred from electronic annotation	5887 // integral to plasma membrane // traceable author statement /// 16020 // membrane // inferred from electronic annotation /// 16021 // integral to membrane // inferred from electronic annotation	4872 // receptor activity // traceable author statement /// 5515 // protein binding // inferred from electronic annotation /// 5529 // sugar binding // traceable author statement /// 5529 // sugar binding // inferred from electronic annotation	---
236589_at	207.848	183.115	0.881005	-0.182777	0.00456362	---	AI762884	---	---	---	---	---
1557478_at	103.237	84.3362	0.816916	-0.29174	0.00456669	LOC554248	BM977131	Hypothetical LOC554248	---	---	---	---
244463_at	60.2081	80.7071	1.34047	0.422738	0.0045802	ADAM23	AI879064	ADAM metallopeptidase domain 23	6508 // proteolysis // inferred from electronic annotation /// 7155 // cell adhesion // inferred from electronic annotation /// 7417 // central nervous system development // traceable author statement	5887 // integral to plasma membrane // traceable author statement /// 16020 // membrane // inferred from electronic annotation /// 16021 // integral to membrane // inferred from electronic annotation	4222 // metalloendopeptidase activity // inferred from electronic annotation /// 5178 // integrin binding // traceable author statement /// 5515 // protein binding // inferred from electronic annotation /// 8237 // metallopeptidase activity // traceable author statement	---
212765_at	125.305	141.126	1.12626	0.171536	0.00458661	CAMSAP1L1	AB029001	calmodulin regulated spectrin-associated protein 1-like 1	---	---	---	---
203094_at	390.964	321.22	0.821608	-0.283477	0.00458975	MAD2L1BP	NM_014628	MAD2L1 binding protein	7096 // regulation of exit from mitosis // inferred from electronic annotation	5634 // nucleus // inferred from direct assay /// 5634 // nucleus // inferred from electronic annotation /// 5737 // cytoplasm // inferred from direct assay	5515 // protein binding // inferred from physical interaction	---
215922_at	93.9559	83.7203	0.89106	-0.166406	0.00459424	REPS1	AL049259	RALBP1 associated Eps domain containing 1	---	---	5509 // calcium ion binding // inferred from electronic annotation	---
235989_at	294.4	255.239	0.866982	-0.205925	0.00459584	---	BE894306	Transcribed locus	---	---	---	---
242648_at	248.413	279.302	1.12435	0.169085	0.00459866	KLHL8	BE858995	kelch-like 8 (Drosophila)	---	---	5515 // protein binding // inferred from electronic annotation	---
215758_x_at	527.566	397.288	0.753057	-0.409168	0.00459963	ZNF93	AC007204	zinc finger protein 93	6350 // transcription // inferred from electronic annotation /// 6355 // regulation of transcription, DNA-dependent // inferred from electronic annotation /// 6355 // regulation of transcription, DNA-dependent // non-traceable author statement	5622 // intracellular // inferred from electronic annotation /// 5634 // nucleus // non-traceable author statement /// 5634 // nucleus // inferred from electronic annotation	3676 // nucleic acid binding // inferred from electronic annotation /// 3700 // transcription factor activity // non-traceable author statement /// 8270 // zinc ion binding // non-traceable author statement /// 46872 // metal ion binding // inferred from electronic annotation /// 3677 // DNA binding // inferred from electronic annotation /// 8270 // zinc ion binding // inferred from electronic an…	---
41856_at	298.682	269.625	0.902717	-0.147655	0.00461243	---	AL049370	Full-length cDNA clone CL0BB018ZE07 of Neuroblastoma of Homo sapiens (human)	---	---	---	---
227854_at	361.466	300.955	0.832594	-0.264314	0.00462467	FANCL	BE620258	Fanconi anemia, complementation group L	6281 // DNA repair // inferred from electronic annotation /// 6512 // ubiquitin cycle // inferred from electronic annotation /// 6974 // response to DNA damage stimulus // inferred from electronic annotation	5634 // nucleus // inferred from electronic annotation	8270 // zinc ion binding // inferred from electronic annotation /// 16874 // ligase activity // inferred from electronic annotation /// 46872 // metal ion binding // inferred from electronic annotation	---
232501_at	234.245	189.118	0.807351	-0.308732	0.00464603	---	AU144956	CDNA FLJ10151 fis, clone HEMBA1003402	---	---	---	---
1558995_at	107.006	89.9607	0.840705	-0.250328	0.00464778	ZNF547	BC042681	zinc finger protein 547	6350 // transcription // inferred from electronic annotation /// 6355 // regulation of transcription, DNA-dependent // inferred from electronic annotation /// 6355 // regulation of transcription, DNA-dependent // inferred from direct assay /// 6810 // transport // inferred from electronic annotation /// 6888 // ER to Golgi vesicle-mediated transport // inferred from electronic annotation /// 1501…	5634 // nucleus // inferred from electronic annotation /// 5622 // intracellular // inferred from electronic annotation /// 5783 // endoplasmic reticulum // inferred from electronic annotation /// 5795 // Golgi stack // inferred from electronic annotation	3677 // DNA binding // inferred from electronic annotation /// 8270 // zinc ion binding // inferred from electronic annotation /// 46872 // metal ion binding // inferred from electronic annotation /// 8134 // transcription factor binding // inferred from physical interaction /// 5478 // intracellular transporter activity // inferred from electronic annotation /// 3676 // nucleic acid binding // i…	---
203133_at	289.625	327.481	1.13071	0.177225	0.00465803	SEC61B	NM_006808	Sec61 beta subunit	6605 // protein targeting // inferred from electronic annotation /// 15031 // protein transport // inferred from electronic annotation /// 6810 // transport // inferred from electronic annotation	5783 // endoplasmic reticulum // inferred from electronic annotation /// 16020 // membrane // inferred from electronic annotation /// 16021 // integral to membrane // inferred from electronic annotation	---	---
205994_at	112.289	91.7147	0.816772	-0.291995	0.00467172	ELK4	NM_001973	ELK4, ETS-domain protein (SRF accessory protein 1)	6355 // regulation of transcription, DNA-dependent // inferred from electronic annotation /// 6366 // transcription from RNA polymerase II promoter // not recorded	5634 // nucleus // inferred from electronic annotation	3700 // transcription factor activity // non-traceable author statement /// 3712 // transcription cofactor activity // traceable author statement /// 5515 // protein binding // traceable author statement /// 43565 // sequence-specific DNA binding // inferred from electronic annotation /// 3677 // DNA binding // inferred from electronic annotation /// 3700 // transcription factor activity // infer…	---
239718_at	121.698	102.314	0.840717	-0.250307	0.00468002	---	R42552	CDNA FLJ42310 fis, clone TRACH2007733	---	---	---	---
223428_s_at	114.09	131.982	1.15682	0.210162	0.00469832	KIAA1160	AI761808	KIAA1160 protein	---	---	---	---
1556279_at	97.3129	86.2038	0.885841	-0.17488	0.00470383	TSEN2	AF086155	TRNA splicing endonuclease 2 homolog (S. cerevisiae)	6388 // tRNA splicing // inferred from electronic annotation /// 6397 // mRNA processing // inferred from electronic annotation /// 8033 // tRNA processing // inferred from electronic annotation	214 // tRNA-intron endonuclease complex // inferred from electronic annotation /// 5634 // nucleus // inferred from electronic annotation	213 // tRNA-intron endonuclease activity // inferred from electronic annotation /// 4519 // endonuclease activity // inferred from electronic annotation /// 16787 // hydrolase activity // inferred from electronic annotation /// 4518 // nuclease activity // inferred from electronic annotation	---
1562719_at	166.462	135.28	0.812678	-0.299243	0.00470406	---	BC043293	CDNA clone IMAGE:5297905	---	---	---	---
1554420_at	274.047	237.54	0.866786	-0.206252	0.00470546	ATF3	AB078026	activating transcription factor 3	6350 // transcription // inferred from electronic annotation /// 6355 // regulation of transcription, DNA-dependent // inferred from electronic annotation	5634 // nucleus // inferred from electronic annotation	3677 // DNA binding // inferred from electronic annotation /// 3700 // transcription factor activity // traceable author statement /// 3714 // transcription corepressor activity // traceable author statement /// 43565 // sequence-specific DNA binding // inferred from electronic annotation /// 46983 // protein dimerization activity // inferred from electronic annotation	Hypertrophy_model // GenMAPP /// Smooth_muscle_contraction // GenMAPP /// Hypertrophy_model // GenMAPP /// Hypertrophy_model // GenMAPP /// Hypertrophy_model // GenMAPP /// Hypertrophy_model // GenMAPP /// Smooth_muscle_contraction // GenMAPP /// Smooth_muscle_contraction // GenMAPP /// Smooth_muscle_contraction // GenMAPP /// Smooth_muscle_contraction // GenMAPP
205456_at	122.095	107.774	0.882703	-0.179999	0.004717	CD3E	NM_000733	CD3e molecule, epsilon (CD3-TCR complex)	6461 // protein complex assembly // non-traceable author statement /// 7172 // signal complex formation // traceable author statement /// 7186 // G-protein coupled receptor protein signaling pathway // traceable author statement /// 42102 // positive regulation of T cell proliferation // inferred from mutant phenotype /// 42110 // T cell activation // non-traceable author statement /// 42981 // r…	5887 // integral to plasma membrane // non-traceable author statement /// 9897 // external side of plasma membrane // inferred from direct assay /// 42101 // T cell receptor complex // non-traceable author statement /// 5886 // plasma membrane // inferred from direct assay /// 42101 // T cell receptor complex // inferred from direct assay /// 16020 // membrane // inferred from electronic annotati…	4888 // transmembrane receptor activity // non-traceable author statement /// 17124 // SH3 domain binding // inferred from physical interaction /// 19901 // protein kinase binding // non-traceable author statement /// 30159 // receptor signaling complex scaffold activity // non-traceable author statement /// 42608 // T cell receptor binding // non-traceable author statement /// 46982 // protein h…	---
213648_at	195.818	170.58	0.871111	-0.199071	0.00471821	EXOSC7	AW614427	exosome component 7	6364 // rRNA processing // traceable author statement /// 6401 // RNA catabolism // non-traceable author statement /// 6364 // rRNA processing // inferred from electronic annotation /// 6396 // RNA processing // inferred from electronic annotation	178 // exosome (RNase complex) // traceable author statement /// 5634 // nucleus // inferred from electronic annotation /// 178 // exosome (RNase complex) // inferred from electronic annotation	175 // 3'-5'-exoribonuclease activity // traceable author statement /// 3723 // RNA binding // traceable author statement /// 4527 // exonuclease activity // inferred from electronic annotation /// 5515 // protein binding // inferred from physical interaction /// 16787 // hydrolase activity // inferred from electronic annotation /// 175 // 3'-5'-exoribonuclease activity // inferred from electroni…	---
1561682_at	62.8252	55.9823	0.891081	-0.166372	0.0047186	TTLL7	BC042527	Tubulin tyrosine ligase-like family, member 7	6464 // protein modification // inferred from electronic annotation	---	4835 // tubulin-tyrosine ligase activity // inferred from electronic annotation /// 16874 // ligase activity // inferred from electronic annotation	---
1564883_a_at	111.891	88.7076	0.792806	-0.334959	0.00472183	TAS1R1	AF387620	taste receptor, type 1, member 1	7165 // signal transduction // inferred from electronic annotation /// 7186 // G-protein coupled receptor protein signaling pathway // inferred from electronic annotation /// 50896 // response to stimulus // inferred from electronic annotation /// 50917 // sensory perception of umami taste // inferred from direct assay	16020 // membrane // inferred from electronic annotation /// 16021 // integral to membrane // Unknown /// 16021 // integral to membrane // inferred from electronic annotation	4872 // receptor activity // inferred from electronic annotation /// 8067 // metabotropic glutamate, GABA-B-like receptor activity // inferred from electronic annotation /// 8527 // taste receptor activity // inferred from direct assay /// 46982 // protein heterodimerization activity // non-traceable author statement /// 4871 // signal transducer activity // inferred from electronic annotation //…	---
232253_at	97.5362	84.3383	0.864687	-0.20975	0.0047394	RAD50	AL564637	RAD50 homolog (S. cerevisiae)	19 // regulation of mitotic recombination // traceable author statement /// 6302 // double-strand break repair // traceable author statement /// 7004 // telomerase-dependent telomere maintenance // traceable author statement /// 7049 // cell cycle // inferred from electronic annotation /// 7126 // meiosis // inferred from electronic annotation /// 7131 // meiotic recombination // traceable author…	781 // chromosome, telomeric region // inferred from electronic annotation /// 30870 // Mre11 complex // traceable author statement /// 5694 // chromosome // inferred from electronic annotation /// 30870 // Mre11 complex // inferred from electronic annotation /// 5634 // nucleus // inferred from electronic annotation	14 // single-stranded DNA specific endodeoxyribonuclease activity // traceable author statement /// 166 // nucleotide binding // inferred from electronic annotation /// 3677 // DNA binding // traceable author statement /// 4518 // nuclease activity // inferred from electronic annotation /// 5524 // ATP binding // inferred from electronic annotation /// 8270 // zinc ion binding // inferred from el…	---
238501_at	58.9923	43.5021	0.73742	-0.439442	0.00474412	---	AA992936	Transcribed locus	---	---	---	---
219458_s_at	62.8971	56.3544	0.895978	-0.158464	0.00474491	NSUN3	NM_022072	NOL1/NOP2/Sun domain family, member 3	---	---	---	---
1552498_at	213.308	171.73	0.805076	-0.312803	0.00474503	ZNF31	NM_145238	zinc finger protein 31	6355 // regulation of transcription, DNA-dependent // inferred from electronic annotation /// 6350 // transcription // inferred from electronic annotation	5634 // nucleus // inferred from electronic annotation	3700 // transcription factor activity // inferred from electronic annotation /// 8270 // zinc ion binding // inferred from electronic annotation /// 3676 // nucleic acid binding // inferred from electronic annotation /// 3677 // DNA binding // inferred from electronic annotation /// 46872 // metal ion binding // inferred from electronic annotation	---
239426_at	98.2966	87.4984	0.890148	-0.167883	0.004752	SLC2A8	AA812746	Solute carrier family 2, (facilitated glucose transporter) member 8	5975 // carbohydrate metabolism // traceable author statement /// 6810 // transport // inferred from electronic annotation /// 8643 // carbohydrate transport // inferred from electronic annotation /// 15758 // glucose transport // traceable author statement /// 15904 // tetracycline transport // inferred from electronic annotation	5887 // integral to plasma membrane // traceable author statement /// 16020 // membrane // inferred from electronic annotation /// 16021 // integral to membrane // inferred from electronic annotation	5215 // transporter activity // inferred from electronic annotation /// 5351 // sugar porter activity // inferred from electronic annotation /// 5355 // glucose transporter activity // inferred from electronic annotation /// 5355 // glucose transporter activity // traceable author statement /// 15520 // tetracycline:hydrogen antiporter activity // inferred from electronic annotation	---
210221_at	93.6116	80.8583	0.863764	-0.21129	0.00475808	CHRNA3	BC000513	cholinergic receptor, nicotinic, alpha 3	6811 // ion transport // inferred from electronic annotation /// 7165 // signal transduction // traceable author statement /// 6810 // transport // inferred from electronic annotation /// 6810 // transport // traceable author statement	5892 // nicotinic acetylcholine-gated receptor-channel complex // traceable author statement /// 16021 // integral to membrane // inferred from electronic annotation /// 45211 // postsynaptic membrane // inferred from electronic annotation /// 16020 // membrane // inferred from electronic annotation	4889 // nicotinic acetylcholine-activated cation-selective channel activity // inferred from electronic annotation /// 4889 // nicotinic acetylcholine-activated cation-selective channel activity // traceable author statement /// 5215 // transporter activity // traceable author statement /// 5216 // ion channel activity // inferred from electronic annotation /// 5230 // extracellular ligand-gated …	---
232135_at	57.5663	51.3138	0.891385	-0.165879	0.00476506	LOC56755	BF112166	hypothetical protein LOC56755	---	---	---	---
222183_x_at	209.056	187.527	0.897019	-0.156789	0.00477536	SNW1	AL390153	CDNA FLJ35189 fis, clone PLACE6016210 /// SNW domain containing 1	398 // nuclear mRNA splicing, via spliceosome // inferred from direct assay /// 6357 // regulation of transcription from RNA polymerase II promoter // traceable author statement /// 16481 // negative regulation of transcription // inferred from direct assay /// 398 // nuclear mRNA splicing, via spliceosome // inferred from electronic annotation /// 6397 // mRNA processing // inferred from electro…	5681 // spliceosome complex // inferred from direct assay /// 5634 // nucleus // inferred from electronic annotation /// 5681 // spliceosome complex // inferred from electronic annotation /// 5634 // nucleus // traceable author statement	3713 // transcription coactivator activity // traceable author statement /// 5112 // Notch binding // inferred from physical interaction /// 5515 // protein binding // inferred from physical interaction	---
226004_at	272.202	235.041	0.863479	-0.211767	0.00477946	CABLES2	AI910855	Cdk5 and Abl enzyme substrate 2	51302 // regulation of cell division // inferred from electronic annotation /// 51726 // regulation of cell cycle // inferred from electronic annotation /// 7049 // cell cycle // inferred from electronic annotation /// 51301 // cell division // inferred from electronic annotation	---	16538 // cyclin-dependent protein kinase regulator activity // inferred from electronic annotation	---
237773_at	188.446	150.482	0.798538	-0.324566	0.00478404	FRMPD4	R38633	FERM and PDZ domain containing 4	---	5856 // cytoskeleton // inferred from electronic annotation	5515 // protein binding // inferred from electronic annotation /// 5488 // binding // inferred from electronic annotation	---
235671_at	211.048	179.563	0.850813	-0.233086	0.0047925	---	AW575926	---	---	---	---	---
228975_at	152.253	130.504	0.857154	-0.222374	0.0047989	SP6	AI817264	Sp6 transcription factor	6350 // transcription // inferred from electronic annotation /// 6355 // regulation of transcription, DNA-dependent // inferred from electronic annotation	5634 // nucleus // inferred from electronic annotation	3677 // DNA binding // inferred from electronic annotation /// 8270 // zinc ion binding // inferred from electronic annotation /// 46872 // metal ion binding // inferred from electronic annotation /// 3676 // nucleic acid binding // inferred from electronic annotation	---
218998_at	470.015	379.948	0.808374	-0.306905	0.00479893	C9orf6	NM_017832	chromosome 9 open reading frame 6	---	---	---	---
228525_at	168.954	134.035	0.793319	-0.334026	0.00481186	---	AL583533	Transcribed locus	---	---	---	---
1564360_a_at	68.2228	51.2318	0.750948	-0.413215	0.00481448	LOC339260	AK057473	Hypothetical protein LOC339260	---	---	---	---
207856_s_at	105.539	125.247	1.18673	0.246996	0.0048294	NSMASE3 /// FLJ41352	NM_017951	neutral sphingomyelinase 3 /// FLJ41352 protein	---	---	5515 // protein binding // inferred from physical interaction	---
228875_at	151.172	121.216	0.801843	-0.318609	0.00482979	C6orf189	AI540210	chromosome 6 open reading frame 189	---	---	---	---
1556829_at	89.0218	72.7622	0.817353	-0.290969	0.00483081	TIPARP	BC033324	TCDD-inducible poly(ADP-ribose) polymerase	---	---	---	---
239057_at	4860.88	3617.87	0.744283	-0.426077	0.00483349	LMOD2	BF438844	leiomodin 2 (cardiac)	---	5856 // cytoskeleton // inferred from electronic annotation	5523 // tropomyosin binding // inferred from electronic annotation	---
204318_s_at	65.4236	53.6798	0.820496	-0.285431	0.00483595	GTSE1	NM_016426	G-2 and S-phase expressed 1	85 // G2 phase of mitotic cell cycle // non-traceable author statement /// 6977 // DNA damage response, signal transduction by p53 class mediator resulting in cell cycle arrest // non-traceable author statement /// 7017 // microtubule-based process // non-traceable author statement	5881 // cytoplasmic microtubule // non-traceable author statement /// 5874 // microtubule // inferred from electronic annotation	---	---
244536_at	69.6621	58.6981	0.842612	-0.24706	0.00484768	TP53BP2	AA702963	Tumor protein p53 binding protein, 2	6915 // apoptosis // inferred from electronic annotation /// 6917 // induction of apoptosis // inferred from direct assay /// 7049 // cell cycle // inferred from electronic annotation /// 7165 // signal transduction // traceable author statement /// 45786 // negative regulation of progression through cell cycle // traceable author statement /// 74 // regulation of progression through cell cycle /…	5737 // cytoplasm // traceable author statement	5070 // SH3/SH2 adaptor activity // traceable author statement /// 5515 // protein binding // inferred from physical interaction /// 51059 // NF-kappaB binding // inferred from physical interaction	---
230585_at	53.3203	45.8288	0.859499	-0.218432	0.00486068	---	AI632692	Transcribed locus	---	---	---	---
242657_at	283.562	236.819	0.835158	-0.259878	0.00489918	IGFBP4	AI078033	Insulin-like growth factor binding protein 4	1501 // skeletal development // traceable author statement /// 1558 // regulation of cell growth // inferred from electronic annotation /// 6259 // DNA metabolism // traceable author statement /// 7165 // signal transduction // traceable author statement /// 8283 // cell proliferation // traceable author statement	5576 // extracellular region // inferred from electronic annotation	5520 // insulin-like growth factor binding // inferred from electronic annotation /// 19838 // growth factor binding // inferred from electronic annotation	Smooth_muscle_contraction // GenMAPP
225862_at	456.981	392.852	0.859667	-0.21815	0.00491479	SLC25A26	AA928255	solute carrier family 25, member 26	6810 // transport // inferred from electronic annotation	5743 // mitochondrial inner membrane // inferred from electronic annotation /// 16020 // membrane // inferred from electronic annotation /// 16021 // integral to membrane // inferred from electronic annotation	5488 // binding // inferred from electronic annotation	---
222992_s_at	6596.12	5931.56	0.89925	-0.153206	0.00491554	NDUFB9	AF261090	NADH dehydrogenase (ubiquinone) 1 beta subcomplex, 9, 22kDa	6120 // mitochondrial electron transport, NADH to ubiquinone // traceable author statement /// 7605 // sensory perception of sound // traceable author statement	5739 // mitochondrion // inferred from electronic annotation /// 5743 // mitochondrial inner membrane // traceable author statement	3954 // NADH dehydrogenase activity // inferred from electronic annotation /// 8137 // NADH dehydrogenase (ubiquinone) activity // traceable author statement /// 16491 // oxidoreductase activity // inferred from electronic annotation	Electron_Transport_Chain // GenMAPP /// Electron_Transport_Chain // GenMAPP
229335_at	143.403	96.9186	0.675845	-0.565235	0.00491677	IGSF4C	BE645821	immunoglobulin superfamily, member 4C	---	16020 // membrane // inferred from electronic annotation /// 16021 // integral to membrane // inferred from electronic annotation	4872 // receptor activity // inferred from electronic annotation	---
1562458_at	66.9119	56.5367	0.844942	-0.243076	0.00492255	UBE2W	AL833723	ubiquitin-conjugating enzyme E2W (putative)	6355 // regulation of transcription, DNA-dependent // inferred from electronic annotation /// 6512 // ubiquitin cycle // inferred from electronic annotation /// 6464 // protein modification // inferred from electronic annotation	5634 // nucleus // inferred from electronic annotation	3700 // transcription factor activity // inferred from electronic annotation /// 4842 // ubiquitin-protein ligase activity // inferred from electronic annotation /// 43565 // sequence-specific DNA binding // inferred from electronic annotation	---
226078_at	119.223	106.32	0.891773	-0.165251	0.00492411	RPUSD1	AL031033	RNA pseudouridylate synthase domain containing 1	6396 // RNA processing // inferred from electronic annotation	---	3723 // RNA binding // inferred from electronic annotation /// 9982 // pseudouridine synthase activity // inferred from electronic annotation	---
218808_at	110.735	88.5939	0.800056	-0.321828	0.00492493	DALRD3 /// LOC651575	NM_018114	DALR anticodon binding domain containing 3 /// similar to DALR anticodon binding domain containing 3 isoform 1	6420 // arginyl-tRNA aminoacylation // inferred from electronic annotation	---	4814 // arginine-tRNA ligase activity // inferred from electronic annotation /// 5524 // ATP binding // inferred from electronic annotation	---
1555520_at	67.1363	57.8099	0.861082	-0.215777	0.00492595	PTCH	BC043542	patched homolog (Drosophila)	7049 // cell cycle // inferred from electronic annotation /// 7165 // signal transduction // traceable author statement /// 8283 // cell proliferation // traceable author statement /// 9653 // morphogenesis // traceable author statement /// 45786 // negative regulation of progression through cell cycle // inferred from electronic annotation	5887 // integral to plasma membrane // traceable author statement /// 16020 // membrane // inferred from electronic annotation /// 16021 // integral to membrane // inferred from electronic annotation	4872 // receptor activity // traceable author statement /// 8158 // hedgehog receptor activity // inferred from electronic annotation /// 4872 // receptor activity // inferred from electronic annotation	---
1560298_at	92.1427	80.1207	0.869528	-0.201695	0.00493338	---	BC030121	CDNA clone IMAGE:4814133	---	---	---	---
243350_at	98.9061	88.2656	0.892418	-0.164209	0.00494011	C5orf15	BE675229	Chromosome 5 open reading frame 15	---	16020 // membrane // inferred from electronic annotation /// 16021 // integral to membrane // inferred from electronic annotation	---	---
1560903_at	58.5646	49.6811	0.848314	-0.23733	0.00494029	---	BM353437	CDNA FLJ30214 fis, clone BRACE2001677	---	---	---	---
1565562_at	250.894	207.098	0.825443	-0.276759	0.00494366	FLJ21687	T49766	PDZ domain containing, X chromosome	---	---	5515 // protein binding // inferred from electronic annotation	---
241467_at	190.036	165.033	0.868432	-0.203516	0.00494933	OSBPL5	AW204093	Oxysterol binding protein-like 5	6869 // lipid transport // inferred from electronic annotation /// 6893 // Golgi to plasma membrane transport // non-traceable author statement /// 8202 // steroid metabolism // inferred from electronic annotation /// 8203 // cholesterol metabolism // non-traceable author statement /// 30301 // cholesterol transport // non-traceable author statement /// 6810 // transport // inferred from electron…	5829 // cytosol // non-traceable author statement	8142 // oxysterol binding // non-traceable author statement	---
1555435_at	152.611	129.209	0.846657	-0.24015	0.00495673	AFF4	BC025700	AF4/FMR2 family, member 4	6366 // transcription from RNA polymerase II promoter // traceable author statement	---	3700 // transcription factor activity // traceable author statement	---
1564264_at	108.326	94.6199	0.873477	-0.195158	0.00495843	---	BC036799	Homo sapiens, clone IMAGE:5590162, mRNA	---	---	---	---
234344_at	42.3106	52.6777	1.24502	0.316174	0.00496012	RAP2C	AF093744	RAP2C, member of RAS oncogene family	7264 // small GTPase mediated signal transduction // inferred from electronic annotation	5622 // intracellular // inferred from electronic annotation /// 16020 // membrane // inferred from electronic annotation	166 // nucleotide binding // inferred from electronic annotation /// 5525 // GTP binding // inferred from electronic annotation	---
231509_at	116.215	101.984	0.877545	-0.188455	0.00496287	C7orf16	AW614524	Chromosome 7 open reading frame 16	6468 // protein amino acid phosphorylation // traceable author statement /// 7165 // signal transduction // traceable author statement /// 7243 // protein kinase cascade // traceable author statement /// 7417 // central nervous system development // traceable author statement /// 7610 // behavior // traceable author statement	5625 // soluble fraction // traceable author statement	4864 // protein phosphatase inhibitor activity // traceable author statement	---
229265_at	189.059	239.835	1.26857	0.343205	0.00497347	---	AA927480	---	---	---	---	---
227618_at	90.9132	80.3686	0.884014	-0.177859	0.00497422	FLJ44635	AI250910	TPT1-like protein	---	5737 // cytoplasm // inferred from electronic annotation	---	---
53720_at	104.278	93.9849	0.901293	-0.149933	0.00497593	FLJ11286	AI862559	hypothetical protein FLJ11286	---	---	---	---
241565_at	141.859	121.484	0.856377	-0.223682	0.00497927	COL4A4	AV652585	Collagen, type IV, alpha 4	6817 // phosphate transport // inferred from electronic annotation /// 42062 // long-term strengthening of neuromuscular junction // inferred from direct assay	5581 // collagen // inferred from electronic annotation /// 5587 // collagen type IV // inferred from direct assay /// 5737 // cytoplasm // inferred from electronic annotation /// 5578 // extracellular matrix (sensu Metazoa) // inferred from electronic annotation /// 5604 // basement membrane // inferred from electronic annotation	5201 // extracellular matrix structural constituent // inferred from electronic annotation /// 5201 // extracellular matrix structural constituent // traceable author statement /// 5198 // structural molecule activity // inferred from electronic annotation	---
227586_at	151.244	114.746	0.758676	-0.398444	0.0049819	LOC124491	AV699843	LOC124491	---	---	---	---
211022_s_at	106.679	89.6991	0.84083	-0.250114	0.00498817	ATRX	BC002521	alpha thalassemia/mental retardation syndrome X-linked (RAD54 homolog, S. cerevisiae)	6281 // DNA repair // traceable author statement /// 6306 // DNA methylation // traceable author statement /// 6310 // DNA recombination // traceable author statement /// 6355 // regulation of transcription, DNA-dependent // traceable author statement /// 7001 // chromosome organization and biogenesis (sensu Eukaryota) // traceable author statement /// 7605 // sensory perception of sound // infer…	5634 // nucleus // traceable author statement /// 5720 // nuclear heterochromatin // traceable author statement /// 5634 // nucleus // inferred from electronic annotation	166 // nucleotide binding // inferred from electronic annotation /// 3678 // DNA helicase activity // traceable author statement /// 3700 // transcription factor activity // not recorded /// 5524 // ATP binding // inferred from electronic annotation /// 8270 // zinc ion binding // inferred from electronic annotation /// 16787 // hydrolase activity // inferred from electronic annotation /// 46872 …	---
228083_at	156.34	135.417	0.866165	-0.207287	0.00499441	CACNA2D4	AI433691	calcium channel, voltage-dependent, alpha 2/delta subunit 4	---	16020 // membrane // inferred from electronic annotation	---	---
240162_at	81.5621	69.9839	0.858044	-0.220876	0.00499681	---	AI240087	CDNA clone IMAGE:4830758	---	---	---	---
1557222_at	72.2792	60.1143	0.831696	-0.265872	0.00500276	---	AW243038	MRNA; cDNA DKFZp686I23117 (from clone DKFZp686I23117)	---	---	---	---
236109_at	79.5294	68.1899	0.857417	-0.221931	0.00500412	RPUSD4	BE674055	RNA pseudouridylate synthase domain containing 4	6396 // RNA processing // inferred from electronic annotation	---	3723 // RNA binding // inferred from electronic annotation /// 4730 // pseudouridylate synthase activity // inferred from electronic annotation /// 9982 // pseudouridine synthase activity // inferred from electronic annotation	---
218677_at	69.9697	63.0093	0.900524	-0.151164	0.00500932	S100A14	NM_020672	S100 calcium binding protein A14	---	---	5509 // calcium ion binding // inferred from electronic annotation	---
242617_at	233.949	195.975	0.837679	-0.25553	0.00501308	GSTZ1	AI290654	Glutathione transferase zeta 1 (maleylacetoacetate isomerase)	6559 // L-phenylalanine catabolism // traceable author statement /// 6572 // tyrosine catabolism // inferred from electronic annotation /// 9072 // aromatic amino acid family metabolism // inferred from electronic annotation /// 6559 // L-phenylalanine catabolism // inferred from electronic annotation	5737 // cytoplasm // inferred from electronic annotation /// 5739 // mitochondrion // inferred from sequence or structural similarity	3824 // catalytic activity // inferred from electronic annotation /// 4364 // glutathione transferase activity // traceable author statement /// 4602 // glutathione peroxidase activity // traceable author statement /// 16034 // maleylacetoacetate isomerase activity // traceable author statement /// 16740 // transferase activity // inferred from electronic annotation /// 16853 // isomerase activit…	Glutathione metabolism // KEGG /// Metabolism of xenobiotics by cytochrome P450 // KEGG /// Tyrosine metabolism // KEGG /// Styrene degradation // KEGG
1563295_at	113.053	103.397	0.914594	-0.128796	0.00502925	---	AF075107	Full length insert cDNA YU12H01	---	---	---	---
227948_at	346.615	249.516	0.719865	-0.474201	0.00503539	FGD4	AI949549	FYVE, RhoGEF and PH domain containing 4	7010 // cytoskeleton organization and biogenesis // inferred from sequence or structural similarity /// 8360 // regulation of cell shape // inferred from sequence or structural similarity /// 30036 // actin cytoskeleton organization and biogenesis // inferred from sequence or structural similarity /// 35023 // regulation of Rho protein signal transduction // inferred from electronic annotation //…	1726 // ruffle // inferred from sequence or structural similarity /// 5794 // Golgi apparatus // inferred from sequence or structural similarity /// 5856 // cytoskeleton // inferred from electronic annotation /// 30027 // lamellipodium // inferred from sequence or structural similarity /// 5737 // cytoplasm // inferred from sequence or structural similarity	3779 // actin binding // inferred from electronic annotation /// 5089 // Rho guanyl-nucleotide exchange factor activity // inferred from electronic annotation /// 5515 // protein binding // inferred from sequence or structural similarity /// 8270 // zinc ion binding // inferred from electronic annotation /// 31267 // small GTPase binding // inferred from sequence or structural similarity /// 4687…	---
1553718_at	288.672	242.059	0.838524	-0.254077	0.00504315	ZNF548	NM_152909	zinc finger protein 548	6355 // regulation of transcription, DNA-dependent // inferred from electronic annotation	5622 // intracellular // inferred from electronic annotation /// 5634 // nucleus // inferred from electronic annotation	3676 // nucleic acid binding // inferred from electronic annotation /// 8270 // zinc ion binding // inferred from electronic annotation	---
203934_at	166.665	129.126	0.774761	-0.368177	0.00504797	KDR	NM_002253	kinase insert domain receptor (a type III receptor tyrosine kinase)	1525 // angiogenesis // inferred from electronic annotation /// 6468 // protein amino acid phosphorylation // inferred from electronic annotation /// 7169 // transmembrane receptor protein tyrosine kinase signaling pathway // traceable author statement /// 30154 // cell differentiation // inferred from electronic annotation /// 7169 // transmembrane receptor protein tyrosine kinase signaling path…	5887 // integral to plasma membrane // traceable author statement /// 16020 // membrane // inferred from electronic annotation /// 16021 // integral to membrane // inferred from electronic annotation	166 // nucleotide binding // inferred from electronic annotation /// 4872 // receptor activity // inferred from electronic annotation /// 5021 // vascular endothelial growth factor receptor activity // traceable author statement /// 5524 // ATP binding // inferred from electronic annotation /// 16740 // transferase activity // inferred from electronic annotation /// 4672 // protein kinase activit…	---
211934_x_at	278.814	234.323	0.840428	-0.250805	0.00505651	GANAB	W87689	glucosidase, alpha; neutral AB	5975 // carbohydrate metabolism // inferred from electronic annotation	5783 // endoplasmic reticulum // inferred from electronic annotation /// 5795 // Golgi stack // inferred from electronic annotation	4553 // hydrolase activity, hydrolyzing O-glycosyl compounds // inferred from electronic annotation /// 5515 // protein binding // inferred from physical interaction /// 16787 // hydrolase activity // inferred from electronic annotation	Galactose metabolism // KEGG /// Starch and sucrose metabolism // KEGG
1563063_at	264.377	201.793	0.763279	-0.389718	0.00505718	---	BC038529	Homo sapiens, clone IMAGE:5164544, mRNA	---	---	---	---
218214_at	140.192	156.957	1.11959	0.162965	0.00506016	C12orf44	NM_021934	chromosome 12 open reading frame 44	---	---	---	---
243268_at	66.2891	59.569	0.898624	-0.15421	0.00506408	C11orf38	AA884069	chromosome 11 open reading frame 38	---	---	---	---
1557059_at	95.4414	81.5558	0.854511	-0.226829	0.00507115	LOC254128	AK098264	Hypothetical protein LOC254128	---	---	---	---
214482_at	75.4116	64.8124	0.85945	-0.218515	0.00507461	ZBTB25	NM_006977	zinc finger and BTB domain containing 25	6350 // transcription // inferred from electronic annotation /// 6355 // regulation of transcription, DNA-dependent // inferred from electronic annotation	5634 // nucleus // inferred from electronic annotation	3700 // transcription factor activity // traceable author statement /// 5515 // protein binding // inferred from physical interaction /// 8270 // zinc ion binding // inferred from electronic annotation /// 46872 // metal ion binding // inferred from electronic annotation /// 3676 // nucleic acid binding // inferred from electronic annotation /// 3677 // DNA binding // inferred from electronic ann…	---
1557114_a_at	287.093	239.524	0.834308	-0.261347	0.00507695	LOC284385	AI421660	hypothetical protein LOC284385	---	---	---	---
215975_x_at	115.511	103.181	0.893253	-0.162859	0.00507943	GK	X68285	glycerol kinase	5975 // carbohydrate metabolism // inferred from electronic annotation /// 6072 // glycerol-3-phosphate metabolism // inferred from electronic annotation /// 6071 // glycerol metabolism // inferred from electronic annotation /// 6071 // glycerol metabolism // non-traceable author statement	5737 // cytoplasm // non-traceable author statement /// 5741 // mitochondrial outer membrane // non-traceable author statement	166 // nucleotide binding // inferred from electronic annotation /// 4370 // glycerol kinase activity // inferred from electronic annotation /// 4370 // glycerol kinase activity // non-traceable author statement /// 5524 // ATP binding // inferred from electronic annotation /// 16740 // transferase activity // inferred from electronic annotation /// 16301 // kinase activity // inferred from elect…	Glycerolipid metabolism // KEGG
225352_at	295.675	335.654	1.13521	0.182961	0.00508799	TLOC1	AI763287	translocation protein 1	6605 // protein targeting // inferred from electronic annotation /// 6613 // cotranslational protein targeting to membrane // traceable author statement /// 15031 // protein transport // inferred from electronic annotation /// 6810 // transport // inferred from electronic annotation	5783 // endoplasmic reticulum // traceable author statement /// 16020 // membrane // inferred from electronic annotation /// 16021 // integral to membrane // traceable author statement /// 16021 // integral to membrane // inferred from electronic annotation /// 5783 // endoplasmic reticulum // inferred from electronic annotation	4872 // receptor activity // traceable author statement /// 8565 // protein transporter activity // inferred from electronic annotation	---
206657_s_at	209.885	242.744	1.15655	0.209833	0.00511738	MYOD1	NM_002478	myogenic differentiation 1	6355 // regulation of transcription, DNA-dependent // inferred from electronic annotation /// 6357 // regulation of transcription from RNA polymerase II promoter // traceable author statement /// 6468 // protein amino acid phosphorylation // traceable author statement /// 7519 // striated muscle development // inferred from electronic annotation /// 7519 // striated muscle development // traceabl…	5634 // nucleus // inferred from electronic annotation /// 5634 // nucleus // traceable author statement	3677 // DNA binding // inferred from electronic annotation /// 3705 // RNA polymerase II transcription factor activity, enhancer binding // traceable author statement /// 3713 // transcription coactivator activity // traceable author statement /// 5515 // protein binding // inferred from physical interaction /// 30528 // transcription regulator activity // inferred from electronic annotation	---
1562327_at	80.1297	69.3352	0.865288	-0.208748	0.00512307	---	BC041340	CDNA clone IMAGE:4794893	---	---	---	---
237150_at	194.368	146.782	0.755179	-0.405109	0.00512591	---	AI653013	Transcribed locus, weakly similar to NP_081070.1 differentially expressed in B16F10 1 [Mus musculus]	---	---	---	---
240099_at	86.4708	75.622	0.874538	-0.193407	0.00513968	ARSG	AA573201	Arylsulfatase G	8152 // metabolism // inferred from electronic annotation	---	5509 // calcium ion binding // inferred from electronic annotation /// 8484 // sulfuric ester hydrolase activity // inferred from electronic annotation /// 16787 // hydrolase activity // inferred from electronic annotation /// 46872 // metal ion binding // inferred from electronic annotation	---
232058_at	104.322	85.1724	0.816437	-0.292586	0.00514746	ACTN4	AU158358	Actinin, alpha 4	6928 // cell motility // traceable author statement /// 51017 // actin filament bundle formation // not recorded	5634 // nucleus // traceable author statement /// 5737 // cytoplasm // traceable author statement /// 15629 // actin cytoskeleton // traceable author statement /// 5634 // nucleus // inferred from electronic annotation	3779 // actin binding // inferred from electronic annotation /// 5200 // structural constituent of cytoskeleton // traceable author statement /// 5509 // calcium ion binding // inferred from electronic annotation	Striated_muscle_contraction // GenMAPP /// Striated_muscle_contraction // GenMAPP
229626_at	125.419	108.885	0.868171	-0.203949	0.00515446	LOC387856	AI971535	similar to expressed sequence AI836003	---	---	---	---
[truncated: 3,466 more rows]
